# Supplementary material for: Anticancer drug prices and clinical outcomes: a cross-sectional study in Italy
Source: PubMed Central journal article supplement — BMJ Open. 2019 Dec 10;9(12):e033728. doi: 10.1136/bmjopen-2019-033728 (PMC6924817; doi:10.1136/bmjopen-2019-033728), 2019-12-10
Supplement: bmjopen-2019-033728.draft_revisions.pdf [file bmjopen-2019-033728.draft_revisions.pdf]

# BMJ Open

BMJ Open is committed to open peer review. As part of this commitment we make the peer review history of every article we publish publicly available.

When an article is published we post the peer reviewers' comments and the authors' responses online. We also post the versions of the paper that were used during peer review. These are the versions that the peer review comments apply to.

The versions of the paper that follow are the versions that were submitted during the peer review process. They are not the versions of record or the final published versions. They should not be cited or distributed as the published version of this manuscript.

BMJ Open is an open access journal and the full, final, typeset and author-corrected version of record of the manuscript is available on our site with no access controls, subscription charges or pay-per-view fees (<http://bmjopen.bmj.com>).

If you have any questions on BMJ Open's open peer review process please email [info.bmjopen@bmj.com](mailto:info.bmjopen@bmj.com)

# BMJ Open

## Clinical outcomes do not correlate with anticancer drug prices: a cross-sectional study in Italy

|                               |                                                                                                                                                                                                                                                                                                                                                                                                                                                                                                                                                                                                                                                                                                                                                                                                                                    |
|-------------------------------|------------------------------------------------------------------------------------------------------------------------------------------------------------------------------------------------------------------------------------------------------------------------------------------------------------------------------------------------------------------------------------------------------------------------------------------------------------------------------------------------------------------------------------------------------------------------------------------------------------------------------------------------------------------------------------------------------------------------------------------------------------------------------------------------------------------------------------|
| Journal:                      | <i>BMJ Open</i>                                                                                                                                                                                                                                                                                                                                                                                                                                                                                                                                                                                                                                                                                                                                                                                                                    |
| Manuscript ID                 | bmjopen-2019-033728                                                                                                                                                                                                                                                                                                                                                                                                                                                                                                                                                                                                                                                                                                                                                                                                                |
| Article Type:                 | Research                                                                                                                                                                                                                                                                                                                                                                                                                                                                                                                                                                                                                                                                                                                                                                                                                           |
| Date Submitted by the Author: | 19-Aug-2019                                                                                                                                                                                                                                                                                                                                                                                                                                                                                                                                                                                                                                                                                                                                                                                                                        |
| Complete List of Authors:     | Trotta, Francesco; Department of Epidemiology of the Regional Health Service Lazio,<br>Mayer, Flavia; Istituto Superiore di Sanita<br>Barone-Adesi, Francesco; Universita degli Studi del Piemonte Orientale Amedeo Avogadro,<br>Esposito, Immacolata; Research and Health Foundation<br>Punreddy, Ranadhir; Universita degli Studi del Piemonte Orientale Amedeo Avogadro<br>Da Cas, Roberto; Italian National Institute of Health, National Centre for Epidemiology<br>Traversa, Giuseppe; Italian National Institute of Health, National Centre for Epidemiology<br>Perrone, Francesco; Istituto Nazionale Tumori IRCCS Fondazione Pascale<br>Martini, Nello; Research and Health Foundation,<br>Gyawali, Bishal ; Harvard Medical School<br>Addis, Antonio; Department of Epidemiology of the Regional Health Service Lazio, ; |
| Keywords:                     | Drug Costs, Antineoplastic Agents/therapeutic use, Treatment Outcome, Antineoplastic Agents                                                                                                                                                                                                                                                                                                                                                                                                                                                                                                                                                                                                                                                                                                                                        |
|                               |                                                                                                                                                                                                                                                                                                                                                                                                                                                                                                                                                                                                                                                                                                                                                                                                                                    |

SCHOLARONE™  
Manuscripts

1  
2  
3 **Article type:** Original article  
4  
5

6 **Title:** Clinical outcomes do not correlate with anticancer drug prices: a cross-sectional study in  
7  
8 Italy  
9

10  
11 **Authors:** Francesco Trotta<sup>1</sup>, Flavia Mayer<sup>2</sup>, Francesco Barone-Adesi<sup>3</sup>, Immacolata Esposito<sup>4</sup>,  
12 Ranadhir Punreddy<sup>3</sup>, Roberto Da Cas<sup>2</sup>, Giuseppe Traversa<sup>2</sup>, Francesco Perrone<sup>5</sup>, Nello Martini<sup>4</sup>,  
13 Bishal Gyawali<sup>6,7</sup>, Antonio Addis<sup>1</sup>.  
14  
15

16  
17 **Affiliation:**  
18

- 19 1. Department of Epidemiology, Lazio Regional Health Service, Rome, Italy
- 20 2. Italian National Institute of Health, Rome, Italy
- 21 3. University of Eastern Piedmont, Novara, Italy
- 22 4. Research and Health Foundation, Rome, Italy
- 23 5. National Cancer Institute, G. Pascale Foundation - IRCCS, Naples, Italy
- 24 6. Program on Regulation, Therapeutics and Law, Department of Medicine, Brigham and  
25 Women's Hospital and Harvard Medical School, Boston, Massachusetts, USA.
- 26 7. Department of Oncology, and Division of Cancer Care and Epidemiology, Queen's  
27 University, Kingston, Canada  
28  
29

30  
31 **Corresponding Author:**

32 Antonio Addis

33 Department of Epidemiology

34 Lazio Regional Health Service, Rome, Italy Via Cristoforo Colombo 112/Pal.A

35 00143 Roma/ Rome Italy

36 Tel: +39 06.99722-139

37 Fax: +39 06.99722111

38 ORCID [0000-0003-0962-9959](https://orcid.org/0000-0003-0962-9959)

39 [agmaddis@gmail.com](mailto:agmaddis@gmail.com)  
40  
41

42 *This research received no specific grant from any funding agency in the public, commercial or not-*  
43 *for-profit sectors*  
44  
45

46 **contributorship statement**  
47

48 FT, NM and AA conceptualized the study; FT, AA, NM, FM, FBA, GT, and RDC designed the study;  
49 FBA, RP, IE and NM were in charge of data extraction and quality control; FM, RDC, and FT  
50 performed the data analysis; FT, RDC, FM, GT, BG and AA drafted the manuscript; all the authors  
51 contributed to the discussion and the interpretation of results, and reviewed the final version of the  
52 manuscript. All authors approved the final manuscript as submitted.  
53  
54

55 The authors have no conflicts of interest relevant to this article to disclose and all authors work for  
56 public Universities, Public Institutions or non-profit organizations  
57  
58

1  
2  
3 **Running head.** Anticancer drug prices and clinical outcomes in Italy  
4

5 **Word Count:** 2950  
6  
7

8 **Abstract:**  
9

10  
11 **Objective** To investigate whether the prices of new anticancer drugs correlated with their relative  
12 benefit despite negotiation.  
13  
14

15  
16 **Design** Retrospective cross-sectional study correlating new anticancer drugs prices with clinical  
17 outcomes  
18  
19

20  
21  
22 **Setting** We did a retrospective cross-sectional study including all new anticancer drugs approved by  
23 the European Medicines Agency (2010-2016) and reimbursed in Italy.  
24  
25

26  
27 **Main Outcome(s) and Measure(s)** Information on clinical outcomes - in terms of median Overall  
28 Survival (OS), median Progression Free Survival (PFS) and Objective Response Rate (ORR) - were  
29 extracted from pivotal trials as reported in the European Public Assessment Reports available on the  
30 EMA website. Cost of a full course treatment was estimated on negotiated official and discounted  
31 prices. Regression coefficients  $\beta$ , their levels of significance  $p$  and the coefficients of determination  
32  $R^2$  were estimated adjusting by tumour type.  
33  
34  
35  
36  
37  
38  
39  
40  
41

42 **Results** Overall, 30 new anticancer drugs (with 35 indications) were available for analysis. There was  
43 no correlation between the improvement in median OS (in weeks) and negotiated price ( $R^2= 0.067$ ,  $n$   
44 = 16 drugs for 17 indications). When the clinical outcomes were expressed as improvements in  
45 median PFS or ORR, 25 drugs (29 indications) were available for analysis, and again, there was no  
46 correlation with prices ( $R^2= 0.004$  and  $0.006$ , respectively).  
47  
48  
49  
50  
51  
52  
53

54 **Conclusions and Relevance:** Our results suggest that the prices of anticancer drugs in Italy do not  
55 reflect their therapeutic benefit. Drug price negotiations, which is mandatory by law in Italy, do not  
56  
57  
58

1  
2  
3 seem to ensure that prices correlate with clinical benefits provided by cancer drugs. These results call  
4  
5 for further efforts to establish the standard determinants of drug prices available at the time of  
6  
7 negotiation. These findings need to be confirmed in other countries where price negotiations are in  
8  
9 place.  
10  
11  
12

### 13 **Strengths and limitations of this study,**

14  
15

- 16 • This study is the first attempt to evaluate whether there were better correlations between  
17 cancer drug prices and clinical outcomes in a setting where central price negotiations are  
18 mandatory for every new medicine.  
19  
20  
21  
22
- 23 • This understanding is important for cancer policy decisions.  
24  
25  
26
- 27 • In our analysis, the relationship between the clinical outcome and cost of anticancer drugs  
28 was ascertained by a simple linear regression model.  
29  
30  
31
- 32 • Clinical outcome, which was the dependent variable, was expressed as absolute or percent  
33 differences in outcomes between treatment and control groups.  
34  
35  
36  
37
- 38 • The main limitations of our study concern data completeness on clinical outcome and price.  
39  
40 We used, as an estimate of benefit, data from pivotal trials retrieved from EPARs.  
41  
42  
43  
44  
45  
46  
47  
48  
49  
50  
51  
52  
53  
54  
55  
56  
57  
58  
59  
60

## Background

High costs of cancer drugs and resulting financial toxicity to cancer patients are now a well-recognized problem in cancer policy throughout the world [1-8]. Various solutions are being proposed to address this problem, of which price negotiations with pharmaceutical companies is proposed as an important strategy especially in the USA [9-11]. Because the Medicare is not allowed to negotiate prices with companies, despite being mandated to cover for every U.S. Food and Drug Administration (FDA) approved drug, various experts have argued that this is the reason for high drug prices in the USA. Indeed, cancer drug prices far exceed the costs of their development and such negotiations might help to lower the prices of cancer drugs as evidenced by lower cost of cancer drugs in other developed countries compared with the USA.

However, little is known about if such negotiations would lead to better correlation between cancer drug prices and the benefits they provide. Studies have shown that drug prices do not correlate with clinical benefits for cancer drugs approved by the FDA, even though such studies have not taken central price negotiations into account [12,13]. Countries such as the United Kingdom and Italy negotiate prices and hence, the correlations might be different.

In Italy, drug price negotiation based on cost-effectiveness evaluation has been mandatory since 2001 for all medicines reimbursed by the National Health Service (NHS) [14,15]. We analysed the correlation between the prices of cancer drugs in Italy with their clinical outcomes to test the hypothesis that central price negotiations leads to better alignment of prices and benefits.

## Methods:

### *Identification of the study sample*

All new drugs approved by the EMA via a centralized procedure between January 2010 and June 2016 for the treatment of either solid or haematologic cancers were initially identified. Generics, biosimilars, interferons and granulocyte-colony stimulating factors (G-CSFs) were excluded. Only anticancer drugs with pivotal trials based on overall survival (OS), progression-free survival (PFS) or objective response rate (ORR) and with prices that were officially negotiated in Italy by 31<sup>st</sup> December 2016 were included in the cohort for analyses.

### *Data extraction*

Information on the clinical outcomes (in terms of median OS, median PFS, ORR) was extracted by two co-investigators (FBA and RP) from pivotal trials that compared new treatments with controls as reported in the European Public Assessment Reports - EPARs (summary table of the main study, Section 2.5.2) publicly available on the EMA website ([www.ema.europa.eu](http://www.ema.europa.eu)). Survival times were expressed in weeks, and the reported OS and PFS were transformed when necessary. Information on therapeutic indication and tumour type were also retrieved.

### *Drug prices*

The cost of a full course or 1-year treatment was estimated by two co-investigators (NM and IE) on the basis of the negotiated official ex-factory price (in euros) of drug packages, as published in the Official Gazette of the Italian Republic ([www.gazzettaufficiale.it](http://www.gazzettaufficiale.it)) and taking into account the posology as reported in the Summary of Product Characteristics (SPC). To compare prices of drugs with different schedules, in the text we refer to drug prices as the cost of a full course or a 1-year treatment. A further estimate took into account additional compulsory rebates [16] or extra-discounts

1  
2  
3 that were agreed with pharmaceutical companies; this information is confidential to the public but is  
4  
5 released to procurement stations within the Italian NHS (e.g., regions, hospitals, and local health  
6  
7 units).  
8  
9

### 10 *Statistical analysis*

11  
12  
13  
14 The following variables were extracted and analysed descriptively: year of approval, therapeutic  
15  
16 indication, type of treatment and control groups, outcome data, official and confidential costs per  
17  
18 treatment (1 year or a full course) and regulatory information (conditional/under exceptional  
19  
20 circumstances approval, or orphan drug status).  
21  
22

23  
24 The relationship between the clinical outcomes and cost of anticancer drugs was ascertained by a  
25  
26 simple linear regression model. Clinical outcome, which was the dependent variable, was expressed  
27  
28 as absolute or percent differences in outcomes between treatment and control groups. Regression  
29  
30 coefficients  $\beta$ , their levels of significance  $p$  and the coefficients of determination  $R^2$  were reported  
31  
32 for each model.  
33  
34

35  
36 We also performed several sensitivity analyses to test the robustness of the results. Specifically, we  
37  
38 performed multiple linear regression with tumour type as the independent variable to take into  
39  
40 account potential differences due to tumour characteristics. Moreover, we also repeated the analysis  
41  
42 after excluding negative outcome differences (in two cases, one of the outcomes was inferior in the  
43  
44 group receiving the new drug than in the comparison group) and actively controlled trials (considering  
45  
46 only placebo-controlled trials). Subgroup analysis by tumour type was also attempted as exploratory  
47  
48 analysis when a minimum number of two anticancer drugs within the same tumour type setting were  
49  
50 observed. All statistical analyses were performed using STATA (Statacorp, version 14.0)  
51  
52  
53  
54  
55  
56  
57  
58  
59  
60



1  
2  
3 *Patient and public involvement*  
4  
5

6 Patients have not been involved in the development of the research question or the design of this  
7  
8 study. However, results of this analysis will be disseminated throughout public conferences, with  
9  
10 statements summarizing our results, and with an open access to the published report posted in our  
11  
12 institutional websites  
13  
14  
15  
16  
17  
18  
19  
20  
21  
22  
23  
24  
25  
26  
27  
28  
29  
30  
31  
32  
33  
34  
35  
36  
37  
38  
39  
40  
41  
42  
43  
44  
45  
46  
47  
48  
49  
50  
51  
52  
53  
54  
55  
56  
57  
58  
59  
60

For peer review only

## Results

From 2010 to mid-2016, 45 new anticancer drugs for 56 different oncology indications were approved via centralized procedures by the EMA. For 40 new anticancer drugs (47 indications), the basis for the approval was a pivotal trial adopting OS, PFS or ORR as a primary outcome; the price negotiation was completed by December 2016 for only 30 new anticancer drugs (35 indications) and are included in our analysis (Table 1). Seven drugs received orphan drug status by the EMA and two (vandetanib and crizotinib) received conditional approval. Of the 35 oncology indications tested in 35 different pivotal trials which were all controlled clinical trials, the commonest indications were melanoma (7 out of 35), followed by haematological cancer (6 out of 35) and non-small cell lung cancer (4 out of 35). In 15 such trials (43%), placebo was used as the control arm. Of the 35 indications, data on OS, PFS and ORR were available for 17, 29 and 29 indications respectively. Each drug-indication pair contributed to one or more of these analyses, depending on which outcomes were reported in the EPAR.

In the treatment groups, the median improvement in the OS and PFS were 11.4 weeks (IQR 8.8-17.2; min 13.2; max 23.5) and 12.8 weeks (IQR 6.4-17; min -7.48; max 58.8), respectively; median ORR improvement in the treatment group was 21.8% (IQR 10-34.6; min -3; max 63.3). The reported ranges have negative minimum values since in two cases - nivolumab for NSCLC and regorafenib for gastrointestinal stromal tumours - the experimental treatment had a negative effect on one of the outcomes compared to the control group (in terms of PFS for nivolumab and ORR for regorafenib). The median negotiated price for a 1-year treatment was 72,392 euros (IQR 53,819-85,800; min 4,942; max 142,785), which was further discounted by 25% (on average) after applying confidential rebates. For all anticancer drugs but ipilimumab the price was calculated as 1-year treatment since the posology reported in the Summary of Product Characteristics (SPC) reported that the treatment should

1  
2  
3  
4  
5  
6  
7  
8  
9  
10  
11  
12  
13  
14  
15  
16  
17  
18  
19  
20  
21  
22  
23  
24  
25  
26  
27  
28  
29  
30  
31  
32  
33  
34  
35  
36  
37  
38  
39  
40  
41  
42  
43  
44  
45  
46  
47  
48  
49  
50  
51  
52  
53  
54  
55  
56  
57  
58  
59  
60

continue as long as clinical benefit is observed or until unacceptable toxicity occurs. In the case of ipilimumab the price was calculated as a course of 4 doses as reported in the SPC.

The official (ex-factory) price of new anticancer drugs and absolute clinical outcomes showed no correlation (Figure 1a-c). The relationship between the improvement in median OS (in weeks) and negotiated price was estimated for 16 drugs (17 indications), and no correlation was observed ( $R^2=0.067$ ). When clinical outcomes were expressed as absolute advantage in median PFS or ORR, 25 drugs (29 indications) were available for analysis, and in these cases, no correlation was observed ( $R^2=0.004$  and  $0.006$ , respectively).

Repeating the analyses and taking into account the additional confidential rebates, which are compulsory for hospital procurement, no improvement in the benefit/price relationships was highlighted (Figure 2a-c). These findings also remained unchanged when the analyses were repeated with adjustments for tumour type (Supplementary Table 1) or when clinical outcome was expressed as a percentage of improvement instead of as an absolute difference (Supplementary Figure 1a-c). Sensitivity analyses that excluded negative improvements in outcomes over a control group (Supplementary Figure 2) and considered only data from placebo controlled trials (Supplementary Figure 3a,b) confirmed the main analysis. The exploratory subgroup analyses by tumour type did not identify specific positive correlation patterns depending on tumour setting (Supplementary Figure 4 a,b).

## Discussion

This study is the first attempt to evaluate whether there were better correlations between cancer drug prices and clinical outcomes in a setting where central price negotiations are mandatory for every new medicine. Our study gave unexpected results to the research question, highlighting no relationships between cost of cancer drugs and benefits. Moreover, all pre-specified sensitivity and subgroup analyses confirmed the main findings. This finding will have important policy implications both for countries like USA where price negotiations are absent and for other countries like Italy where price negotiations do exist.

In our study, the correlation between drug costs and clinical outcomes was even lower than the ones previously noted in the US context [12,13], showing that negotiations did not tilt the relationship between drug prices and benefit positively. Thus, higher drug pricing remains despite the Italian legislative environment, where approval based on cost-effectiveness analysis and price negotiations have been mandatory by law since 2001 [14,15]. This finding may cast doubts on the role of the negotiation itself. However, it is important to understand that countries like Italy who do negotiate drug prices do such negotiations only for binary decisions of approval or no-approval, and do not negotiate prices in relation to the benefits. This understanding is important for cancer policy decisions.

Indeed, there is no legal policy in any country to negotiate prices differently for drugs approved on the basis of surrogate endpoints versus survival outcomes or drugs that improve survival in days versus those that improve survival in months or drugs with immature benefit risk profiles [17-21]. Although steps in the right direction, in lack of such policy, the value frameworks proposed by organizations such as ASCO, ESMO or NCCN have become little more than intellectual exercises [22-25].

1  
2  
3  
4  
5  
6 Another reason price negotiations did not achieve better price-value correlations is that because of  
7  
8 the global market of drugs, each single country - although large – only represents a small portion of  
9  
10 the consumer market. Thus, companies “wield the stick”, setting the maximum price that the market  
11  
12 will bear [26]. In addition, in Italy, no threshold for incremental cost-effectiveness ratio (ICER) has  
13  
14 been determined; thus, no limit is in place to be used as a decision rule in resource allocation at the  
15  
16 time of negotiation/reimbursement decisions. The lack of such kind of cut-off might have contributed  
17  
18 to the negative results in our study. However, we recognize that even when a threshold for ICER is  
19  
20 well established, such as in the UK [27], continuous exceptions have been allowed in the case of  
21  
22 anticancer drugs. For example, an ad hoc fund established in 2010 (i.e., the Cancer Drug Fund,) was  
23  
24 recently dismissed by the Parliament because it did not deliver meaningful value to patients or society  
25  
26 [28].  
27  
28  
29  
30  
31

32 In the EU context (where newer anticancer drugs are approved by EMA without considering the  
33  
34 added-value or cost-effectiveness), the complexity further increases because once a marketing  
35  
36 authorization is granted, it may become difficult to manage the reimbursement issue at a national  
37  
38 level [29]. Moreover, it is also difficult for payers (NHS/insurance) to defend the thesis against the  
39  
40 public opinion that an anticancer drug cannot be reimbursed because it is too expensive [29, 30].  
41  
42 Indeed, as our study shows, the confidential discounts following negotiations between a member state  
43  
44 and a company do not ameliorate the correlation between treatment costs and benefits even though  
45  
46 they reduce absolute drug prices.  
47  
48  
49  
50

51 Another factor that negatively influences the contractual power of negotiation is non-transparent  
52  
53 information on drug prices across countries. Difficulties in retrieving full information on prices have  
54  
55 been already recognized in a recent survey comparing prices of anticancer drugs in 16 EU countries,  
56  
57  
58  
59  
60

1  
2  
3 Australia and New Zealand [31]. Vogler et al. found that price information is scarce and not disclosed  
4  
5 due to confidential discounts or MEAs, calling for higher transparency. The authors state that it is in  
6  
7 the interest of policy makers to remove clauses limiting disclosure on price information because they  
8  
9 risk overpaying when setting prices through external price referencing. This concern might be  
10  
11 relevant in the Italian context since the negotiation procedure for reimbursement takes into account  
12  
13 the price in other EU countries as well as the price of similar products within the same  
14  
15 pharmacotherapeutic group [32].  
16  
17

18  
19  
20 We believe that two partly independent approaches could be adopted by policy makers to achieve a  
21  
22 better balance between cancer drug prices and benefits. First, price negotiations should be more  
23  
24 strictly based on the level of evidence as well as the magnitudes of benefit. An ICER measure (such  
25  
26 as QALY) should represent a threshold for reimbursement, thus setting a starting point for price  
27  
28 negotiation and adjusting the ICER threshold based on the magnitude of the relative benefit reached.  
29  
30 If the information on the relative value is not available at the time of approval, comparisons can be  
31  
32 performed using indirect techniques, whereas after entering the market, payers should play a major  
33  
34 role in supporting the evidence generating process.  
35  
36  
37

38  
39 The second approach that could attain lower prices would require an increased transparency on the  
40  
41 costs of drug development process, including the relative contributions from academia and public  
42  
43 sector to the development of a drug [33-37]. For instance, research conducted to evaluate efforts of  
44  
45 drug development processes highlighted that about half of the most transformative drugs approved  
46  
47 by the FDA had substantial contributions to their development by academic researchers supported by  
48  
49 government funding [33,34]; in addition, it has been estimated that the cost of late clinical  
50  
51 development takes a limited part of the whole process [35]. It is probably the right time to  
52  
53 appropriately acknowledge the contributions of publicly funded research during drug price  
54  
55 negotiation with companies. Often, comparative effectiveness research is funded by public  
56  
57  
58  
59  
60

1  
2  
3 institutions to test different treatments in real practice on robust outcomes with longer follow up or  
4  
5 special populations [36,37]. The findings of these studies should be linked to a continuous price re-  
6  
7 negotiation over the life cycle of a product.  
8  
9

10 Other approaches identified as possible solutions to keep the health system sustainable address the  
11  
12 general governance of the system, i.e., when the price is already set. In fact, a price-volume approach  
13  
14 [38] or indication-based pricing [39,40] have been modelled, each presenting pros and cons.  
15  
16 Moreover, given that different oncology settings appear to be oligopolistic, thus refraining from price  
17  
18 competition, another possible solution comes from national/regional tenders among therapeutic  
19  
20 categories when more alternatives are available [41].  
21  
22  
23  
24

25 The main limitations of our study concern data completeness on clinical outcome and price. We used,  
26  
27 as an estimate of benefit, data from pivotal trials retrieved from EPARs. Moreover, we are not aware  
28  
29 if further (more robust) data became available at a later stage when the price was negotiated at the  
30  
31 national level. In fact, in Italy, the Health Technology Assessment reports used for cost effective  
32  
33 analysis at the time of reimbursement decisions are not publicly available. Regarding the price  
34  
35 estimate, we estimated the treatment costs for 1-year treatment or for the total course in the case of  
36  
37 ipilimumab where the treatment course lasts less than 1 year. However, the exclusion of ipilimumab  
38  
39 would not alter the main findings. Another important limitation is that we have not considered quality  
40  
41 of life outcomes as another metric of clinical benefit. Furthermore, a recent study has shown that  
42  
43 quality of life outcomes are not routinely collected or published, and that the tools used to measure  
44  
45 quality of life are varied to have a uniform metric for comparison [42]. Although we have included  
46  
47 surrogate measures such as PFS or ORR as clinical outcomes in our analysis because they were  
48  
49 considered as the basis for approval by the regulatory agency, these surrogate measures do not always  
50  
51 correlate with true clinical benefits in terms of improved survival or improved quality of life [42,43].  
52  
53  
54  
55  
56  
57  
58  
59  
60

1  
2  
3 Moreover, additional savings were calculated “a posteriori” from the Managed Entry Agreements in  
4 place in Italy (whose information is not publicly available) and were not considered in the analyses.  
5  
6  
7 Another factor that might have impacted the price estimation is the rebate obtained at the  
8 regional/local level following drug tenders. However, this information was not available for the  
9  
10 analyses and would have been not generalizable at the national level. Our study is a retrospective  
11  
12 cross-sectional correlation study that aimed at evaluating whether central price negotiation  
13  
14 (mandatory by law in Italy) leads to better alignment of prices and the benefits known at the time of  
15  
16 drug approval. This means that our analysis is not aimed at comparing costs and outcomes within  
17  
18 drug classes, as a typical cost effective study, and we never intended to assess the add values of the  
19  
20 approved drugs in the context of all other drugs sharing the same indication. The “population”/cohort  
21  
22 approach that we adopted has the intrinsic limitation of including drugs approved for different  
23  
24 indications based on different clinical data packages. The consequent heterogeneity stemming from  
25  
26 this approach was resolved adjusting the correlation analyses by tumour type or conducting several  
27  
28 sub-analyses. Following this approach, we found results consistent with primary findings thus  
29  
30 confirming the robustness of methods and results.  
31  
32  
33  
34  
35  
36  
37

### 38 **Conclusion**

39  
40  
41 Our results suggest that price negotiations for approval decisions alone may not bring balance  
42  
43 between prices and benefits of anticancer drugs. Other strategies, such as value based price  
44  
45 negotiations, price negotiations strictly based on strength of evidence and price transparencies may  
46  
47 be necessary to better achieve the drug prices and benefits balance. These results need to be confirmed  
48  
49 in other countries where a national price negotiation exists.  
50  
51  
52  
53  
54  
55  
56  
57  
58  
59  
60



1  
2  
3  
4  
5  
6  
7  
8  
9  
10  
11  
12  
13  
14  
15  
16  
17  
18  
19  
20  
21  
22  
23  
24  
25  
26  
27  
28  
29  
30  
31  
32  
33  
34  
35  
36  
37  
38  
39  
40  
41  
42  
43  
44  
45  
46  
47  
48  
49  
50  
51  
52  
53  
54  
55  
56  
57  
58  
59  
60

## References:

- 1) Quintiles IMS Institute. Outlook for Global Medicines through 2021. December 2016. 1-54.  
[http://www.imshealth.com/en/thought-leadership/quintilesims-institute/reports/outlook\\_for\\_global\\_medicines\\_through\\_2021](http://www.imshealth.com/en/thought-leadership/quintilesims-institute/reports/outlook_for_global_medicines_through_2021)
- 2) Ghinea N, Lipworth W, Kerridge I. Propaganda or the cost of innovation? Challenging the high price of new drugs. *BMJ*. 352: i1284, 2016 doi: 10.1136/bmj.i1284.
- 3) European Commission - Press release. Antitrust: Commission opens formal investigation into Aspen Pharma's pricing practices for cancer medicines. Brussels, 15 May 2017.  
[http://europa.eu/rapid/press-release\\_IP-17-1323\\_en.htm](http://europa.eu/rapid/press-release_IP-17-1323_en.htm)
- 4) Gordon N, Stemmer SM, Greenberg D, et al. Trajectories of Injectable Cancer Drug Costs After Launch in the United States. *J Clin Oncol.*; 36: 319-325, 2018.
- 5) Narang AK, Nicholas LH. Out-of-Pocket Spending and Financial Burden Among Medicare Beneficiaries With Cancer. *JAMA Oncol.*3:757-765, 2017.
- 6) Shankaran V, Ramsey S. Addressing the Financial Burden of Cancer Treatment: From Copay to Can't Pay. *JAMA Oncol.*; 1 :273-4, 2015.
- 7) Liz Szabo. Cancer patients skipping medicines or delaying treatment due to high drug prices. *STAT* 15 March, 2017. <https://www.statnews.com/2017/03/15/cancer-patients-drug-prices/>
- 8) de Souza JA, Conti RM. Mitigating Financial Toxicity Among US Patients With Cancer. *JAMA Oncol.* 3: 765-766, 2017.
- 9) Kesselheim AS, Avorn J, Sarpatwari A. The High Cost of Prescription Drugs in the United States: Origins and Prospects for Reform. *JAMA.*; 316: 858-71, 2016.
- 10) Hwang TJ, Kesselheim AS, Sarpatwari A. Value-Based Pricing and State Reform of Prescription Drug Costs. *JAMA.* 318: 609-610, 2017

- 1  
2  
3 11) Fralick M, Avorn J, Kesselheim AS. The Price of Crossing the Border for Medications. N  
4 Engl J Med.; 377: 311-313, 2017  
5  
6  
7 12) Mailankody S, Prasad V. Five Years of Cancer Drug Approvals: Innovation, Efficacy, and  
8 Costs. JAMA Oncol. 1: 539-40, 2015 Erratum in: JAMA Oncol. 1:544, 2015.  
9  
10  
11 13) Vivot A, Jacot J, Zeitoun JD, et al. Clinical benefit, price and approval characteristics of  
12 FDA-approved new drugs for treating advanced solid cancer, 2000-2015. Ann Oncol.  
13 28:1111-1116, 2017.  
14  
15 14) Comitato Interministeriale per la Programmazione Economica. Individuazione dei criteri per  
16 la contrattazione del prezzo dei farmaci (Deliberazione n.3/2001). Official Gazette of the  
17 Italian Republic. N. 73 del 28-03-2001.  
18  
19 <http://www.gazzettaufficiale.it/eli/id/2001/03/28/001A3188/sg>  
20  
21 15) Italian Parliament. Legge 24 novembre 2003, n. 326. Conversione in legge, con  
22 modificazioni, del decreto-legge 30 settembre 2003, n. 269, recante disposizioni urgenti per  
23 favorire lo sviluppo e per la correzione dell'andamento dei conti pubblici. Official Gazette of  
24 the Italian Republic. N. 274; 25 November 2003.  
25  
26 <http://www.parlamento.it/parlam/leggi/03326l.htm>  
27  
28 16) Italian Parliament . Legge 27 December 2006, n. 296. Art. 1 comma 796, lettera g).  
29 Disposizioni per la formazione del bilancio annuale e pluriennale dello Stato (finanziaria  
30 2007). Official Gazette of the Italian Republic. N. 299; 27 December 2006, Suppl ord. n.  
31 244.  
32  
33 17) Apolone G, Joppi R, Bertele' V, et al. Ten years of marketing approvals of anticancer drugs  
34 in Europe: regulatory policy and guidance documents need to find a balance between  
35 different pressures. Br J Cancer. 93: 504-9, 2005.  
36  
37  
38  
39  
40  
41  
42  
43  
44  
45  
46  
47  
48  
49  
50  
51  
52  
53  
54  
55  
56  
57  
58  
59  
60

- 1  
2  
3 18) Bertele' V, Banzi R, Capasso F, et al. Haematological anticancer drugs in Europe: any added  
4 value at the time of approval? *Eur J Clin Pharmacol.*; 63: 713-9, 2007.  
5  
6  
7  
8 19) Trotta F, Apolone G, Garattini S, et al. Stopping a trial early in oncology: for patients or for  
9 industry? *Ann Oncol.* 19: 1347-53, 2008. doi: 10.1093/annonc/mdn042. Epub 2008 Feb 27  
10  
11  
12 20) Kim C, Prasad V. Cancer Drugs Approved on the Basis of a Surrogate End Point and  
13 Subsequent Overall Survival: An Analysis of 5 Years of US Food and Drug Administration  
14 Approvals. *JAMA Intern Med.* 175: 1992-4, 2015.  
15  
16  
17 21) Banzi R, Gerardi C, Bertele' V, et al. Approvals of drugs with uncertain benefit-risk profiles  
18 in Europe. *Eur J Intern Med.* 26: 572-84, 2015.  
19  
20  
21 22) Salas-Vega S, Iliopoulos O, Mossialos E. Assessment of Overall Survival, Quality of Life,  
22 and Safety Benefits Associated with New Cancer Medicines. *JAMA Oncol.* 3:382-390,  
23 2017.  
24  
25  
26 23) Wise PH. Cancer drugs, survival, and ethics. *BMJ*; 355: i5792, 2016  
27  
28  
29 <https://doi.org/10.1136/bmj.i5792> (Published 09 November 2016)  
30  
31  
32 24) Del Paggio JC, Sullivan R, Schrag D, et al. Delivery of meaningful cancer care: a  
33 retrospective cohort study assessing cost and benefit with the ASCO and ESMO  
34 frameworks. *Lancet Oncol.* 18: 887-894, 2017.  
35  
36  
37 25) Sobrero A1, Bruzzi P. Incremental advance or seismic shift? The need to raise the bar of  
38 efficacy for drug approval. *J Clin Oncol.* 27:5868-73, 2009.  
39  
40  
41 26) Ramsey SD, Lyman GH, Bangs R. Addressing Skyrocketing Cancer Drug Prices Comes  
42 with Trade-offs: Pick Your Poison. *JAMA Oncol.* 2: 425-6, 2016  
43  
44  
45 27) Dillon A. Carrying NICE over the threshold. NICE. 19 February 2015.  
46  
47  
48 <https://www.nice.org.uk/news/blog/carrying-nice-over-the-threshold>  
49  
50  
51  
52  
53  
54  
55  
56  
57  
58  
59  
60

- 1  
2  
3 28) Aggarwal A, Fojo T, Chamberlain C, et al. Do patient access schemes for high-cost cancer  
4 drugs deliver value to society? -lessons from the NHS Cancer Drugs Fund. *Ann Oncol.*  
5  
6  
7 2017.  
8  
9  
10 29) Cohen D. Cancer drugs: high price, uncertain value. *BMJ.* Oct 4; 359: j4543, 2017.  
11  
12 30) Prasad V. Do cancer drugs improve survival or quality of life? *BMJ.* Oct 4; 359: j4528,  
13  
14 2017  
15  
16 31) Vogler S, Vitry A, Babar ZU. Cancer drugs in 16 European countries, Australia, and New  
17  
18 Zealand: a cross-country price comparison study. *Lancet Oncol.* 17: 39-47, 2016  
19  
20 32) Folino-Gallo P, Montilla S, Bruzzone M, et al. Pricing and reimbursement of  
21  
22 pharmaceuticals in Italy. *Eur J Health Econ.*; 9:305-10, 2008.  
23  
24 33) Stevens AJ, Jensen JJ, Wyller K, et al. The role of public-sector research in the discovery of  
25  
26 drugs and vaccines. *N Engl J Med.* 364: 535-41, 2011.  
27  
28 34) Kesselheim AS, Tan YT, Avorn J. The roles of academia, rare diseases, and repurposing in  
29  
30 the development of the most transformative drugs. *Health Aff (Millwood).*; 34: 286-93,  
31  
32 2015.  
33  
34 35) Martin L, Hutchens M, Hawkins C, et al. How much do clinical trials cost? *Nat Rev Drug*  
35  
36 *Discov.*; 16: 381-382.,2017.  
37  
38 36) Italian Medicines Agency (AIFA) Research & Development Working Group. Feasibility  
39  
40 and challenges of independent research on drugs: the Italian medicines agency (AIFA)  
41  
42 experience. *Eur J Clin Invest.* 40: 69-86, 2010.  
43  
44 37) Traversa G, Masiero L, Sagliocca L, et al. Italian program for independent research on  
45  
46 drugs: 10-year follow-up of funded studies in the area of rare diseases. *Orphanet J Rare Dis.*  
47  
48 11: 36, 2016.  
49  
50  
51  
52  
53  
54  
55  
56  
57  
58  
59  
60

- 1  
2  
3 38) Messori A. Application of the Price-Volume Approach in Cases of Innovative Drugs Where  
4 Value-Based Pricing is Inadequate: Description of Real Experiences in Italy. *Clin Drug*  
5 *Investig.* 36: 599-603, 2016.  
6  
7  
8  
9  
10 39) Bach PB. Indication-specific pricing for cancer drugs. *JAMA.* 312:1629-30. 2014.  
11  
12 40) Chandra A, Garthwaite C. The Economics of Indication-Based Drug Pricing. *N Engl J Med.*  
13 *377:103-106.* 2017.  
14  
15  
16 41) Kantarjian H, Rajkumar SV. Why are cancer drugs so expensive in the United States, and  
17 what are the solutions? *Mayo Clin Proc.* 90:500-4. 2015.  
18  
19  
20 42) Hwang TJ, Gyawali B. Association between progression-free survival and patients' quality  
21 of life in cancer clinical trials. *Int J Cancer.* 2019;144:1746-1751. doi: 10.1002/ijc.31957.  
22  
23  
24 43) Prasad V, Kim C, Burotto M, Vandross A. The Strength of Association Between Surrogate  
25 End Points and Survival in Oncology: A Systematic Review of Trial-Level Meta-analyses.  
26 *JAMA Intern Med.* 2015; 175:1389-98. doi: 10.1001/jamainternmed.2015.2829.  
27  
28  
29  
30  
31  
32  
33  
34  
35  
36  
37  
38  
39  
40  
41  
42  
43  
44  
45  
46  
47  
48  
49  
50  
51  
52  
53  
54  
55  
56  
57  
58  
59  
60

1  
2  
3  
4  
5  
6  
7  
8  
9  
10  
11  
12  
13  
14  
15  
16  
17  
18  
19  
20  
21  
22  
23  
24  
25  
26  
27  
28  
29  
30  
31  
32  
33  
34  
35  
36  
37  
38  
39  
40  
41  
42  
43  
44  
45  
46  
47  
48  
49  
50  
51  
52  
53  
54  
55  
56  
57  
58  
59  
60

For peer review only

**Table 1.** Characteristics of the 30 anticancer drugs included in the analysis.

| Medicine Name | Active Substance               | Clinical setting                                                                                               | Treatment group                                                                         | Control group                                                               | PFS TRT (median in weeks) | PFS CRT (median in weeks) | OS TRT (median in weeks) | OS CRT (median in weeks) | ORR TRT (%) | ORR CRT (%) | Year First Auth. | Official negot. price (€) | Disc. price (€) |
|---------------|--------------------------------|----------------------------------------------------------------------------------------------------------------|-----------------------------------------------------------------------------------------|-----------------------------------------------------------------------------|---------------------------|---------------------------|--------------------------|--------------------------|-------------|-------------|------------------|---------------------------|-----------------|
| Teysuno       | tegafur / gimeracil / oteracil | advanced gastric cancer in combination with cisplatin.                                                         | teysuno 25 mg/m + cisplatin 75 mg/m <sup>2</sup>                                        | 5-fluorouracil 1000 mg/m <sup>2</sup> /24 + cisplatin 100 mg/m <sup>2</sup> |                           |                           | 34.4                     | 31.6                     |             |             | 2011             | 4942                      | 3479            |
| Jevtana       | cabazitaxel                    | hormone-refractory metastatic prostate cancer .                                                                | cabazitaxel + prednisone                                                                | mitoxantrone + prednisone                                                   | 11.2                      | 5.6                       | 60.4                     | 50.8                     | 14.4        | 4.4         | 2011             | 52983                     | 38254           |
| Yervoy        | ipilimumab                     | advanced (unresectable or metastatic) melanoma                                                                 | ipilimumab + placebo                                                                    | peptide vaccine glycoprotein 100 (gp100)                                    | 11.04                     | 11.04                     | 39.8                     | 25.8                     | 5.7         | 1.5         | 2011             | 71400                     | 45107           |
| Votubia       | everolimus                     | Renal angiomyolipoma associated with tuberous sclerosis complex (TSC)                                          | everolimus                                                                              | placebo                                                                     |                           | 45.48                     |                          |                          | 41.8        | 0           | 2011             | 66521                     | 41424           |
| Votubia       | everolimus                     | Subependymal giant cell astrocytoma (SEGA) associated with tuberous sclerosis complex (TSC)                    | everolimus                                                                              | placebo                                                                     |                           |                           |                          |                          | 34.6        | 0           |                  | 53216                     | 33139           |
| Halaven       | eribulin                       | locally advanced or metastatic breast cancer                                                                   | eribulin 1.23 mg/m <sup>2</sup> (equivalent to 1.4 mg/m <sup>2</sup> eribulin mesylate) | treatment of physician's choice                                             | 16.14                     | 9.71                      | 57.57                    | 45.86                    | 12.2        | 4.7         | 2011             | 32300                     | 28130           |
| Zytiga        | abiraterone acetate            | metastatic castration-resistant prostate cancer                                                                | abiraterone acetate                                                                     | placebo                                                                     | 22.4                      | 14.4                      | 68.9                     | 48.7                     | 29.1        | 5.5         | 2011             | 46842                     | 33397           |
| Dacogen       | decitabine                     | newly diagnosed de novo or secondary acute myeloid leukaemia (AML)                                             | decitabine                                                                              | patient's choice                                                            | 14.8                      | 8.4                       | 30.8                     | 20                       |             |             | 2012             | 54366                     | 34346           |
| Caprelsa      | vandetanib                     | aggressive and symptomatic medullary thyroid cancer (MTC) unresectable locally advanced or metastatic disease. | vandetanib                                                                              | placebo                                                                     | 122                       | 77.2                      |                          |                          | 45          | 13          | 2012             | 67405                     | 53533           |
| Zelboraf      | vemurafenib                    | BRAF-V600-mutation-positive unresectable or metastatic melanoma.                                               | vemurafenib                                                                             | dacarbazine                                                                 | 21.28                     | 6.44                      | 52.8                     | 39.6                     | 48.4        | 5.5         | 2012             | 119929                    | 108236          |
| Xalkori       | crizotinib                     | anaplastic lymphoma kinase (ALK) positive advanced non-small cell lung cancer (NSCLC).                         | crizotinib                                                                              | pemetrexed or docetaxel                                                     | 30.8                      | 12                        |                          |                          | 65.3        | 19.5        | 2012             | 79538                     | 57427           |

|           |                       |                                                                                                                                                       |                                      |                                                                     |       |      |       |       |      |      |      |        |        |
|-----------|-----------------------|-------------------------------------------------------------------------------------------------------------------------------------------------------|--------------------------------------|---------------------------------------------------------------------|-------|------|-------|-------|------|------|------|--------|--------|
| Xalkori   | crizotinib            | first-line treatment of adults with anaplastic lymphoma kinase (ALK) positive advanced non-small cell lung cancer (NSCLC).                            | crizotinib                           | chemotherapy                                                        | 43.6  | 28   |       |       | 74.4 | 45   |      | 79538  | 57427  |
| Inlyta    | axitinib              | advanced renal-cell carcinoma (RCC)                                                                                                                   | axitinib                             | sorafenib                                                           | 26.8  | 18.8 |       |       | 19.4 | 9.4  | 2012 | 57632  | 39295  |
| Perjeta   | pertuzumab            | HER2-positive metastatic or locally recurrent unresectable breast cancer                                                                              | pertuzumab + trastuzumab + docetaxel | placebo + trastuzumab + docetaxel                                   | 74    | 49.6 |       |       | 80.2 | 69.3 | 2013 | 51643  | 46608  |
| Kadcyla   | trastuzumab emtansine | HER2-positive, unresectable locally advanced or metastatic breast cancer                                                                              | trastuzumab emtansine (tdm1)         | lapatinib + capecitabine (lap+cap)                                  | 38.4  | 25.6 | 123.9 | 100.4 |      |      | 2013 | 87215  | 75877  |
| Giotrif   | afatinib              | locally advanced or metastatic non-small cell lung cancer (NSCLC) with activating EGFR mutation(s);                                                   | afatinib (film-coated tablets)       | pemetrexed (lyophilised powder) + cisplatin (solution for infusion) | 44.56 | 27.6 |       |       | 56.1 | 22.6 | 2013 | 29528  | 21853  |
| Stivarga  | regorafenib           | metastatic colorectal cancer (CRC)                                                                                                                    | regorafenib + best supportive care   | placebo + best supportive care                                      | 8.4   | 7.4  | 28    | 21.6  | 1    | 0.4  | 2013 | 85800  | 77434  |
| Stivarga  | regorafenib           | unresectable or metastatic gastrointestinal stromal tumors (GIST)                                                                                     | regorafenib + best supportive care   | placebo + best supportive care                                      | 21    | 4    |       |       | 1.5  | 4.5  |      | 85800  | 77434  |
| Tafinlar  | dabrafenib            | unresectable or metastatic melanoma with a BRAF V600 mutation.                                                                                        | dabrafenib                           | dacarbazine                                                         | 27.6  | 10.8 | 72.8  | 62.4  | 59   | 24   | 2013 | 107935 | 87670  |
| Zaltrap   | aflibercept           | metastatic colorectal cancer (MCRC)                                                                                                                   | aflibercept+folfiri                  | placebo+folfiri                                                     | 27.6  | 18.7 | 54    | 48.4  | 19.8 | 11.1 | 2013 | 30576  | 27591  |
| Xtandi    | enzalutamide          | metastatic castration resistant prostate cancer                                                                                                       | enzalutamide (mdv3100)               | placebo                                                             | 33.2  | 11.6 | 74.4  | 54.4  |      |      | 2013 | 49184  | 31960  |
| Imnovid   | pomalidomide          | relapsed and refractory multiple myeloma                                                                                                              | pom+ld-dex                           | hd-dex                                                              | 15.7  | 8    |       | 34    |      |      | 2013 | 127985 | 101646 |
| Lynparza* | olaparib              | platinum-sensitive relapsed BRCA-mutated (germline and/or somatic) high grade serous epithelial ovarian, fallopian tube, or primary peritoneal cancer | olaparib                             | placebo                                                             | 33.6  | 19.2 | 119.2 | 111.2 |      |      | 2014 | 70517  | 52142  |
| Cyramza   | ramucirumab           | advanced gastric cancer or gastro-oesophageal junction adenocarcinoma with disease progression                                                        | ramucirumab+ paclitaxel              | placebo+paclitaxel                                                  | 17.6  | 11.6 | 38.4  | 29.6  | 27.9 | 16.1 | 2014 | 87360  | 78842  |
| Mekinist  | trametinib            | unresectable or metastatic melanoma with a BRAF V600 mutation.                                                                                        | trametinib                           | chemotherapy (dtic or paclitaxel)                                   | 19.6  | 6    | 62.4  | 45.2  | 19   | 5    | 2014 | 62398  | 28157  |



|    |           |                          |                                                                                                                                                                |                                            |                                   |       |  |  |      |      |      |      |      |      |       |                |
|----|-----------|--------------------------|----------------------------------------------------------------------------------------------------------------------------------------------------------------|--------------------------------------------|-----------------------------------|-------|--|--|------|------|------|------|------|------|-------|----------------|
| 1  | Imbruvica | ibrutinib                | chronic lymphocytic leukaemia (CLL)                                                                                                                            | ibrutinib                                  | chlorambucil                      |       |  |  | 75.6 |      |      | 82.4 | 35.3 |      | 73805 | 51663          |
| 2  | Zydelig   | idelalisib               | chronic lymphocytic leukaemia (CLL)                                                                                                                            | idelalisib + rituximab                     | placebo + rituximab               |       |  |  | 22   |      |      | 74.5 | 14.5 | 2014 | 48667 | 34067          |
| 3  | Sylvant   | siltuximab               | multicentric Castlemans disease                                                                                                                                | siltuximab + best supportive care          | placebo + best supportive care    |       |  |  |      |      |      | 37.7 | 3.8  | 2014 | 66104 | 29829          |
| 4  | Keytruda  | pembrolizumab            | advanced(unresectable or metastatic) melanoma                                                                                                                  | ipilimumab                                 | pembrolizumab                     | 22    |  |  | 11.2 |      |      | 33.7 | 11.9 | 2015 | 90400 | 81586          |
| 5  | Opdivo    | nivolumab                | advanced (unresectable or metastatic) melanoma                                                                                                                 | nivolumab 3 mg/kg                          | dacarbazine                       | 18.8  |  |  | 16.8 |      |      | 31.7 | 10.6 | 2015 | 81310 | 71181          |
| 6  | Opdivo    | nivolumab                | locally advanced or metastatic non-small cell lung cancer (NSCLC)                                                                                              | nivolumab 3 mg/kg                          | docetaxel 75 mg/m2                | 9.32  |  |  | 16.8 | 48.8 | 37.4 | 19.2 | 12.4 |      | 81310 | 71181          |
| 7  | Opdivo    | nivolumab                | advanced renal cell carcinoma                                                                                                                                  | nivolumab 3 mg/kg                          | everolimus100mg                   | 18.4  |  |  | 17.8 | 100  | 78.2 | 25.1 | 5.4  |      | 81310 | in negotiation |
| 8  | Lenvima   | lenvatinib mesylate      | progressive, locally advanced or metastatic, differentiated (papillary/follicular/Hrthle cell) thyroid carcinoma (DTC), refractory to radioactive iodine (RAI) | lenvatinib                                 | placebo                           | 73.2  |  |  | 14.4 |      |      | 64.8 | 1.5  | 2015 | 68433 | 58673          |
| 9  | Cotellic  | cobimetinib hemifumarate | unresectable or metastatic melanoma with a BRAF V600 mutation                                                                                                  | cobimetinib+vemurafenib                    | placebo+vemurafenib               | 45.2  |  |  | 24   |      |      | 67.8 | 44.8 | 2015 | 75374 | 54420          |
| 10 | Kyprolis  | carfilzomib              | multiple myeloma who have received at least one prior therapy.                                                                                                 | carfilzomib + lenalidomide + dexamethasone | lenalidomide + dexamethasone (rd) | 105.2 |  |  | 70.4 |      |      | 87.1 | 67.7 | 2015 | 75900 | 44525          |

Progression Free Survival (PFS); Overall Survival (OS); Treatment Group (TRT); Control Group (CTR); Objective Response Rate (ORR); Official Negotiated Prices (Official Negot.); Discounted Prices (Disc. Prices).

\*: During the evaluation at the EMA, lymparza was found to be more effective in a subgroup of patients with a specific biomarker with the following outcome results: PFS lymparza: 44,8 w; PFS control: 17,2 w; OS lymparza: 139,6 w; OS control: 127,6.

1  
2  
3  
4  
5  
6  
7  
8  
9  
10  
11  
12  
13  
14  
15  
16  
17  
18  
19  
20  
21  
22  
23  
24  
25  
26  
27  
28  
29  
30  
31  
32  
33  
34  
35  
36  
37  
38  
39  
40  
41  
42  
43  
44  
45  
46

For peer review only

1  
2  
3  
4  
5  
6  
7  
8  
9  
10  
11  
12  
13  
14  
15  
16  
17  
18  
19  
20  
21  
22  
23  
24  
25  
26  
27  
28  
29  
30  
31  
32  
33  
34  
35  
36  
37  
38  
39  
40  
41  
42  
43  
44  
45  
46  
47  
48  
49  
50  
51  
52  
53  
54  
55  
56  
57  
58  
59  
60

## Figure, tables, titles and legends

### Figure 1. Correlation between anticancer drug prices (officially negotiated) and health benefits

*Figure 1a. Official negotiated price (ex-factory) vs difference in median OS (16 drugs are included in the analysis: 15 with a single indication and one with two indications)*

*Figure 1b. Official negotiated price (ex-factory) vs difference in median PFS (25 drugs are included in the analysis: 22 with a single indication, two with two indications and one with three indication)*

*Figure 1c. Official negotiated price (ex-factory) vs proportion of ORR (24 drugs are included in the analysis: 20 with a single indication, three with two indications and one with three indications)*

Legend: Progression Free Survival (PFS); Overall Survival (OS); Objective Response Rate (ORR);

### Figure 2. Correlation between anticancer drug prices (discounted) and health benefits

*Figure 2a. Discounted price with additional compulsory rebates vs difference in median OS (16 drugs related to a single indication are included in the analysis)*

*Figure 2b. Discounted price with additional compulsory rebates vs difference in median PFS (25 drugs are included in the analysis: 22 with a single indication and three with two indications)*

*Figure 2c. Discounted price with additional compulsory rebates vs proportion of ORR (24 drugs are included in the analysis: 20 with a single indication and four with two indications)*

Legend: Progression Free Survival (PFS); Overall Survival (OS); Objective Response Rate (ORR);

### Table 1. Characteristics of the 30 anticancer drugs included in the analysis.

Legend:

Progression Free Survival (PFS); Overall Survival (OS); Treatment Group (TRT); Control Group (CTR); Objective Response Rate (ORR); Official Negotiated Prices (Official Negot.); Discounted Prices (Disc. Prices).

\*: During the evaluation at the EMA, lymparza was found to be more effective in a subgroup of patients with a specific biomarker with the following outcome results: PFS lymparza: 44,8 w; PFS control: 17,2 w; OS lymparza: 139,6 w; OS control: 127,6.

### Supplementary Table 1. Details of the statistical analysis conducted

### Supplementary Figures 1-4. Correlations in the sensitivity analysis conducted

*Supplementary Figure 1a. Official negotiated price (ex-factory) vs percentage improvement in median Overall Survival (OS) (16 drugs are included in the analysis: 15 with a single indication and one with two indications)*

*Supplementary Figure 1b. Official negotiated price (ex-factory) vs percentage improvement in median Progression Free Survival (PFS) (25 drugs are included in the analysis: 22 with a single indication, two with two indications and one with three indication)*

1  
2  
3 *Supplementary Figure 1c. Official negotiated price (ex-factory) vs percentage improvement in*  
4 *proportion of Objective Response Rate (ORR) (24 drugs are included in the analysis: 20 with a*  
5 *single indication, three with two indications and one with three indications)*  
6

7  
8 *Figure 2. Official negotiated price (ex-factory) vs median Progression Free Survival (PFS),*  
9 *excluding negative outcome data (25 drugs are included in the analysis: 22 with a single indication*  
10 *and three with two indications)*  
11

12 *Supplementary Figure 3a. Official negotiated price (ex-factory) vs median Overall Survival (OS),*  
13 *considering only data from placebo-controlled trials. (7 drugs related to a single indication are*  
14 *included in the analysis)*  
15

16 *Supplementary Figure 3b. Official negotiated price (ex-factory) vs median Progression Free*  
17 *Survival (PFS), considering only data from placebo-controlled trials. (11 drugs are included in the*  
18 *analysis: 10 with a single indication and one with 2 indications)*  
19

20  
21 *Supplementary Figure 4a. Official negotiated price (ex-factory) vs median Progression Free*  
22 *Survival (PFS), stratified by type of cancer (at least 2 indications for each cancer type). (24 drugs*  
23 *are included in the analysis: 21 with a single indication, two with two indications and one with three*  
24 *indication)*  
25

26 *Supplementary Figure 4b. Discounted price with additional compulsory rebates vs median*  
27 *Progression Free Survival (PFS), stratified by type of cancer (at least 2 indications for each cancer*  
28 *type). (24 drugs are included in the analysis: 21 with a single indication and three with 2*  
29 *indications)*  
30  
31

32 Legend: Progression Free Survival (PFS); Overall Survival (OS); Objective Response Rate (ORR);  
33  
34  
35  
36  
37  
38  
39  
40  
41  
42  
43  
44  
45  
46  
47  
48  
49  
50  
51  
52  
53  
54  
55  
56  
57  
58  
59  
60

**1a. Official negotiated price (ex-factory) vs difference in median OS (16 drugs are included in the analysis: 15 with a single indication and one with two indications)**

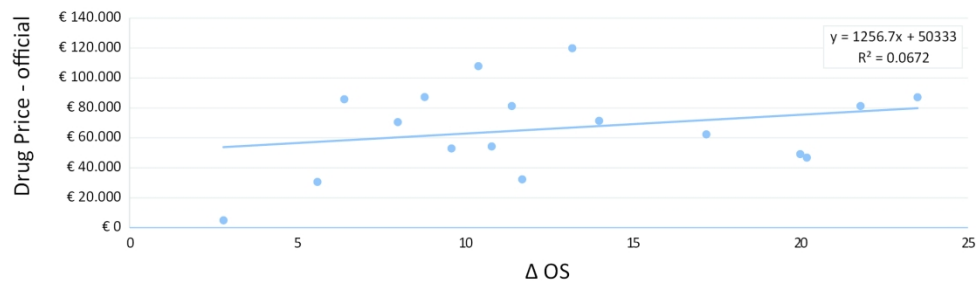

**1b. Official negotiated price (ex-factory) vs difference in median PFS (25 drugs are included in the analysis: 22 with a single indication, two with two indications and one with three indication)**

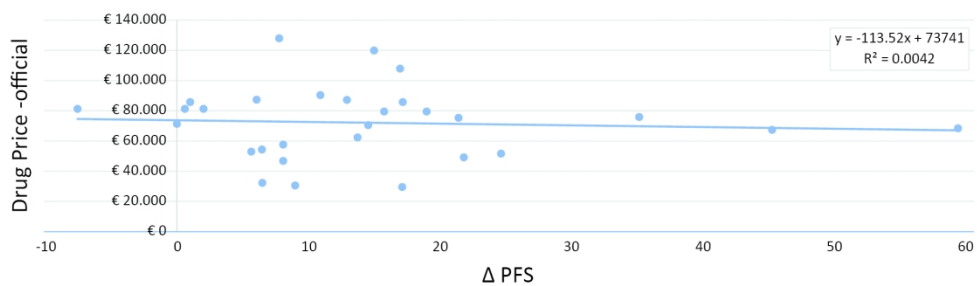

**1c. Official negotiated price (ex-factory) vs proportion of ORR (24 drugs are included in the analysis: 20 with a single indication, three with two indications and one with three indications)**

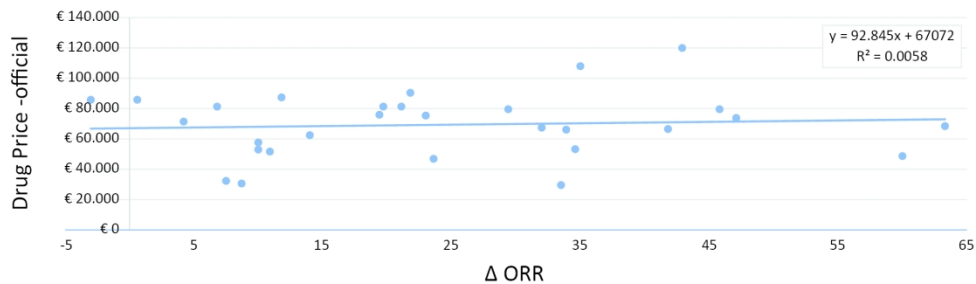

Correlation between anticancer drug prices (officially negotiated) and health benefits

180x212mm (300 x 300 DPI)

**2a. Discounted price with additional compulsory rebates vs difference in median OS (16 drugs related to a single indication are included in the analysis)**

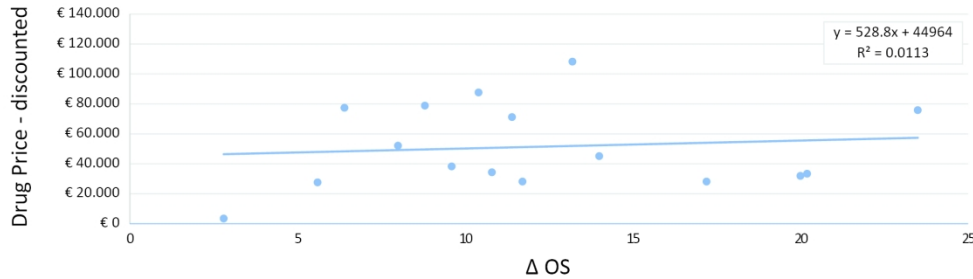

**2b. Discounted price with additional compulsory rebates vs difference in median PFS (25 drugs are included in the analysis: 22 with a single indication and three with two indications)**

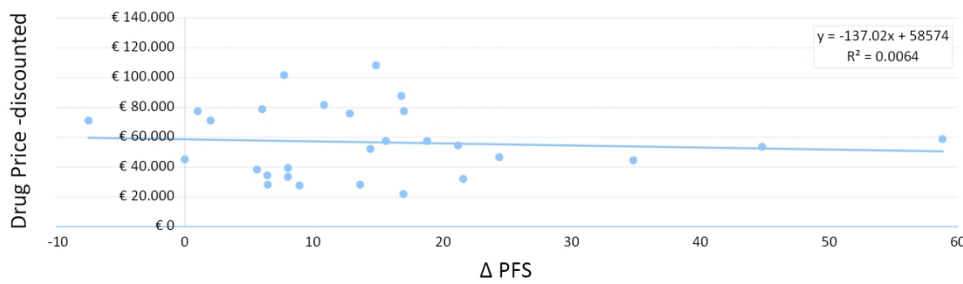

**2c. Discounted price with additional compulsory rebates vs proportion of ORR (24 drugs are included in the analysis: 20 with a single indication and four with two indications)**

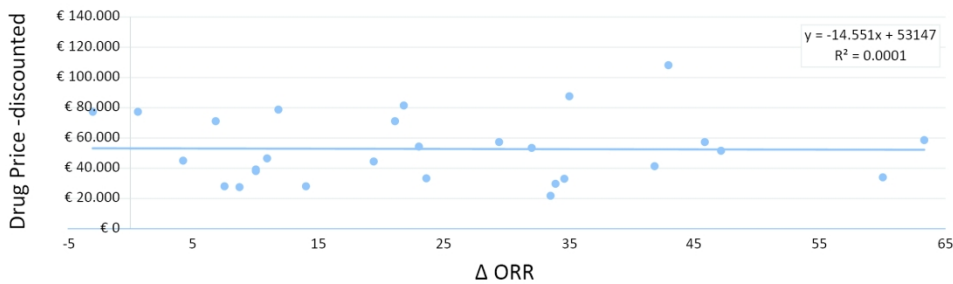

Correlation between anticancer drug prices (discounted) and health benefits

180x212mm (300 x 300 DPI)

| Dependent variable        | Independent variable 1 | Independent variable 2 | Number of drugs involved in the analysis | Type of linear regression | Intercept | Coefficient of the Independent variable 1 | p value of the Independent variable 1 | Correlation coefficient: r | Coefficient of Determination: R <sup>2</sup> |
|---------------------------|------------------------|------------------------|------------------------------------------|---------------------------|-----------|-------------------------------------------|---------------------------------------|----------------------------|----------------------------------------------|
| Official negotiated price | Δ OS                   |                        | 17                                       | simple                    | 50332.71  | 1256.724                                  | 0.315                                 | 0.259                      | 0.067                                        |
| Discounted price          | Δ OS                   |                        | 16                                       | simple                    | 44963.88  | 528.800                                   | 0.695                                 | 0.11                       | 0.0113                                       |
| Official negotiated price | Δ OS                   | tumor type             | 17                                       | multiple                  | 57765.99  | 2065.264                                  | 0.433                                 |                            | 0.412                                        |
| Discounted price          | Δ OS                   | tumor type             | 16                                       | multiple                  | 55312.8   | 1391.947                                  | 0.614                                 |                            | 0.257                                        |
| Official negotiated price | % Δ OS                 |                        | 17                                       | simple                    | 56230.04  | 349.505                                   | 0.524                                 | 0.166                      | 0.027                                        |
| Discounted price          | % Δ OS                 |                        | 16                                       | simple                    | 50127.28  | 42.986                                    | 0.937                                 | 0.022                      | 0.0005                                       |
| Official negotiated price | % Δ OS                 | tumor type             | 17                                       | multiple                  | 72407.98  | 292.048                                   | 0.766                                 |                            | 0.362                                        |
| Discounted price          | % Δ OS                 | tumor type             | 16                                       | multiple                  | 68456.17  | 89.3936                                   | 0.930                                 |                            | 0.2286                                       |
| Official negotiated price | Δ PFS                  |                        | 29                                       | simple                    | 73741.11  | -113.515                                  | 0.738                                 | -0.065                     | 0.004                                        |
| Discounted price          | Δ PFS                  |                        | 28                                       | simple                    | 58574.12  | -137.018                                  | 0.687                                 | -0.080                     | 0.006                                        |
| Official negotiated price | Δ PFS                  | tumor type             | 29                                       | multiple                  | 70454.93  | -271.324                                  | 0.635                                 |                            | 0.338                                        |
| Discounted price          | Δ PFS                  | tumor type             | 28                                       | multiple                  | 56293.38  | -393.926                                  | 0.508                                 |                            | 0.283                                        |
| Official negotiated price | % Δ PFS                |                        | 29                                       | simple                    | 68763.32  | 33.7994                                   | 0.427                                 | 0.153                      | 0.024                                        |
| Discounted price          | % Δ PFS                |                        | 28                                       | simple                    | 52823.84  | 36.2925                                   | 0.392                                 | 0.169                      | 0.028                                        |
| Official negotiated price | % Δ PFS                | tumor type             | 29                                       | multiple                  | 66564.96  | 15.935                                    | 0.765                                 |                            | 0.333                                        |
| Discounted price          | % Δ PFS                | tumor type             | 28                                       | multiple                  | 51337.49  | 11.068                                    | 0.842                                 |                            | 0.266                                        |
| Official negotiated price | Δ ORR                  |                        | 29                                       | simple                    | 67072.16  | 92.845                                    | 0.696                                 | 0.076                      | 0.006                                        |
| Discounted price          | Δ ORR                  |                        | 28                                       | simple                    | 53147.09  | -14.550                                   | 0.953                                 | -0.010                     | 0.000                                        |
| Official negotiated price | Δ ORR                  | tumor type             | 29                                       | multiple                  | 62277.57  | 180.118                                   | 0.607                                 |                            | 0.448                                        |
| Discounted price          | Δ ORR                  | tumor type             | 28                                       | multiple                  | 42598.33  | 324.629                                   | 0.383                                 |                            | 0.450                                        |
| Official negotiated price | % Δ ORR                |                        | 27                                       | simple                    | 69838.7   | 0.563                                     | 0.918                                 | 0.020                      | 0.000                                        |
| Discounted price          | % Δ ORR                |                        | 26                                       | simple                    | 53627.54  | 0.965                                     | 0.864                                 | 0.036                      | 0.001                                        |
| Official negotiated price | % Δ ORR                | tumor type             | 27                                       | multiple                  | 67262.18  | 1.719                                     | 0.814                                 |                            | 0.436                                        |
| Discounted price          | % Δ ORR                | tumor type             | 26                                       | multiple                  | 51599.74  | 2.958                                     | 0.704                                 |                            | 0.405                                        |

1  
2  
3  
4  
5  
6  
7  
8  
9  
10  
11  
12  
13  
14  
15  
16  
17  
18  
19  
20  
21  
22  
23  
24  
25  
26  
27  
28  
29  
30  
31  
32  
33  
34  
35  
36  
37  
38  
39  
40  
41  
42  
43  
44  
45  
46  
47  
48  
49  
50  
51  
52  
53  
54  
55  
56  
57  
58  
59  
60

**1a. Official negotiated price (ex-factory) vs percentage improvement in median Overall Survival (OS)**  
(16 drugs are included in the analysis: 15 with a single indication and one with two indications)

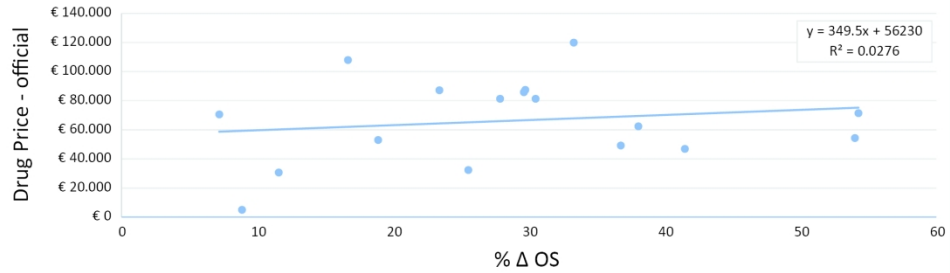

**1b. Official negotiated price (ex-factory) vs percentage improvement in median Progression Free Survival (PFS)**  
(25 drugs are included in the analysis: 22 with a single indication, two with two indications and one with three indication)

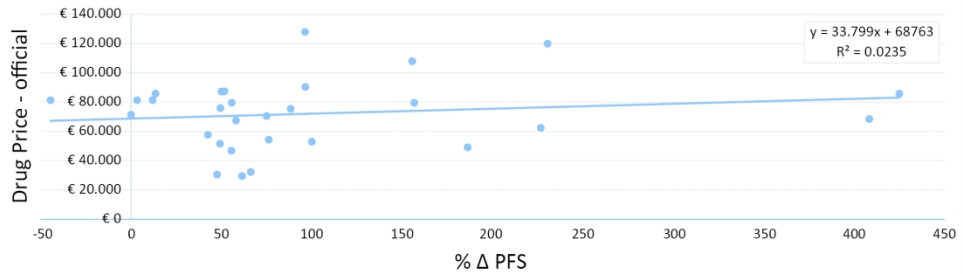

**1c. Official negotiated price (ex-factory) vs percentage improvement in proportion of Objective Response Rate (ORR)**  
(24 drugs are included in the analysis: 20 with a single indication, three with two indications and one with three indications)

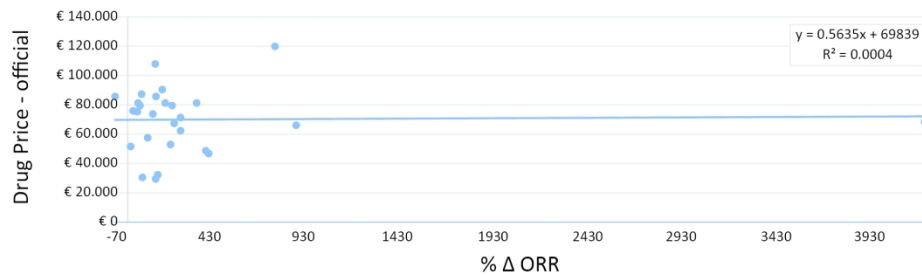

180x222mm (300 x 300 DPI)



1  
2  
3  
4  
5  
6  
7  
8  
9  
10  
11  
12  
13  
14  
15  
16  
17  
18  
19  
20  
21  
22  
23  
24  
25  
26  
27  
28  
29  
30  
31  
32  
33  
34  
35  
36  
37  
38  
39  
40  
41  
42  
43  
44  
45  
46  
47  
48  
49  
50  
51  
52  
53  
54  
55  
56  
57  
58  
59  
60

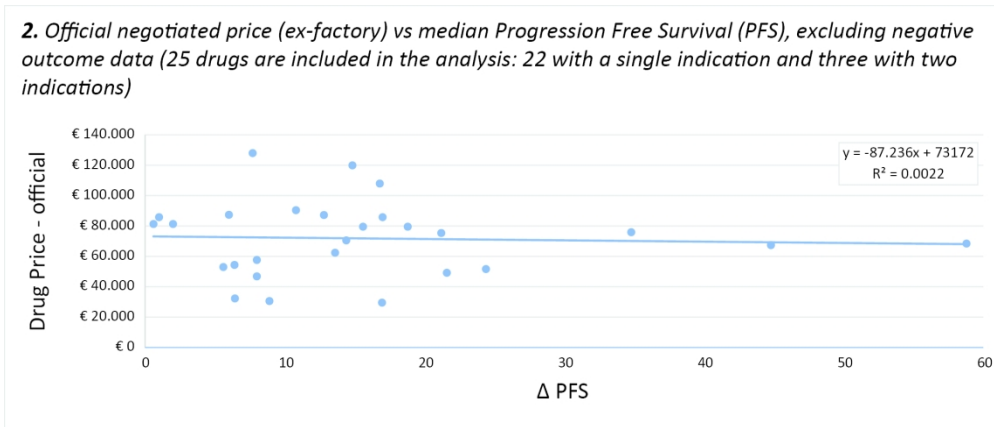

180x76mm (300 x 300 DPI)

**3a. Official negotiated price (ex-factory) vs median Overall Survival (OS), considering only data from placebo-controlled trials. (7 drugs related to a single indication are included in the analysis)**

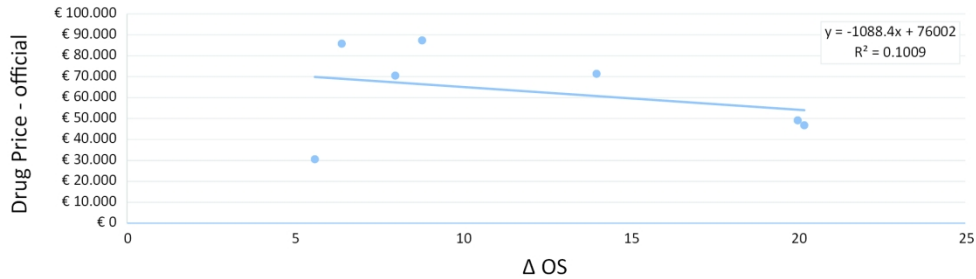

**3b. Official negotiated price (ex-factory) vs median Progression Free Survival (PFS), considering only data from placebo-controlled trials. (11 drugs are included in the analysis: 10 with a single indication and one with 2 indications)**

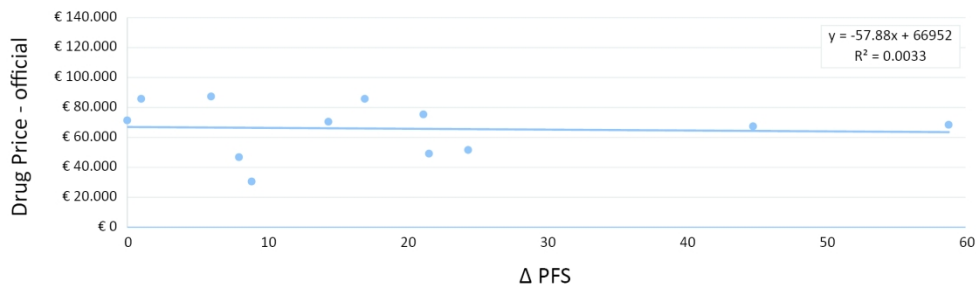

180x146mm (300 x 300 DPI)

**4a.** Official negotiated price (ex-factory) vs median Progression Free Survival (PFS), stratified by type of cancer (at least 2 indications for each cancer type). (24 drugs are included in the analysis: 21 with a single indication, two with two indications and one with three indication)

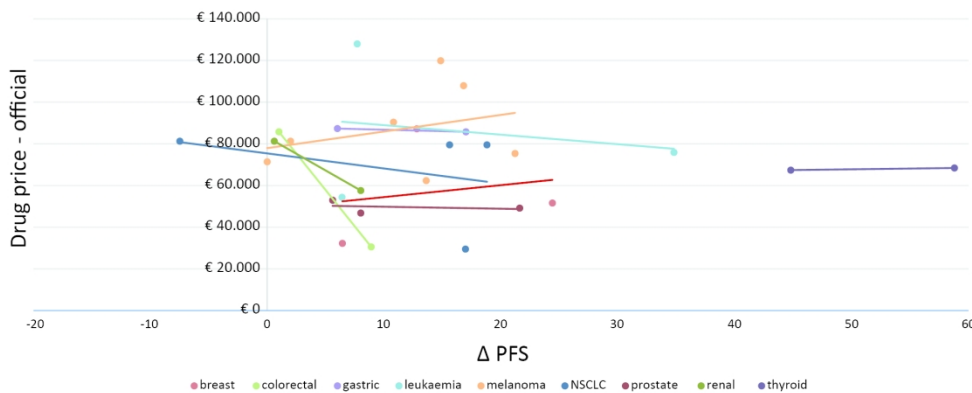

**4b.** Discounted price with additional compulsory rebates vs median Progression Free Survival (PFS), stratified by type of cancer (at least 2 indications for each cancer type). (24 drugs are included in the analysis: 21 with a single indication and three with 2 indications)

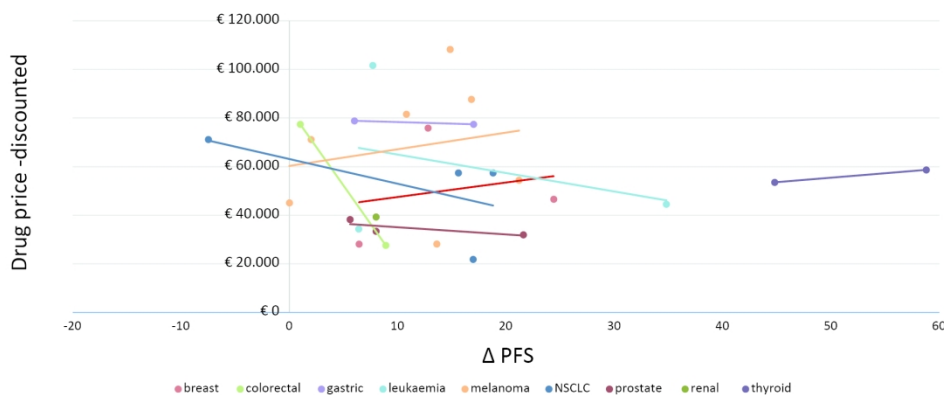

180x188mm (300 x 300 DPI)

## STROBE (Strengthening The Reporting of OBServational Studies in Epidemiology) Checklist

A checklist of items that should be included in reports of observational studies. You must report the page number in your manuscript where you consider each of the items listed in this checklist. If you have not included this information, either revise your manuscript accordingly before submitting or note N/A.

**Note:** An Explanation and Elaboration article discusses each checklist item and gives methodological background and published examples of transparent reporting. The STROBE checklist is best used in conjunction with this article (freely available on the Web sites of PLoS Medicine at <http://www.plosmedicine.org/>, Annals of Internal Medicine at <http://www.annals.org/>, and Epidemiology at <http://www.epidem.com/>). Information on the STROBE Initiative is available at [www.strobe-statement.org](http://www.strobe-statement.org).

| Section and Item     | Item No. | Recommendation                                                                                                                                                                                                                                                                                                                                                                                                                                                                 | Reported on Page No. |
|----------------------|----------|--------------------------------------------------------------------------------------------------------------------------------------------------------------------------------------------------------------------------------------------------------------------------------------------------------------------------------------------------------------------------------------------------------------------------------------------------------------------------------|----------------------|
| Title and Abstract   | 1        | (a) Indicate the study's design with a commonly used term in the title or the abstract                                                                                                                                                                                                                                                                                                                                                                                         |                      |
|                      |          | (b) Provide in the abstract an informative and balanced summary of what was done and what was found                                                                                                                                                                                                                                                                                                                                                                            |                      |
| <b>Introduction</b>  |          |                                                                                                                                                                                                                                                                                                                                                                                                                                                                                |                      |
| Background/Rationale | 2        | Explain the scientific background and rationale for the investigation being reported                                                                                                                                                                                                                                                                                                                                                                                           |                      |
| Objectives           | 3        | State specific objectives, including any prespecified hypotheses                                                                                                                                                                                                                                                                                                                                                                                                               |                      |
| <b>Methods</b>       |          |                                                                                                                                                                                                                                                                                                                                                                                                                                                                                |                      |
| Study Design         | 4        | Present key elements of study design early in the paper                                                                                                                                                                                                                                                                                                                                                                                                                        |                      |
| Setting              | 5        | Describe the setting, locations, and relevant dates, including periods of recruitment, exposure, follow-up, and data collection                                                                                                                                                                                                                                                                                                                                                |                      |
| Participants         | 6        | (a) <i>Cohort study</i> —Give the eligibility criteria, and the sources and methods of selection of participants. Describe methods of follow-up<br><br><i>Case-control study</i> —Give the eligibility criteria, and the sources and methods of case ascertainment and control selection. Give the rationale for the choice of cases and controls<br><br><i>Cross-sectional study</i> —Give the eligibility criteria, and the sources and methods of selection of participants |                      |
|                      |          | (b) <i>Cohort study</i> —For matched studies, give matching criteria and number of exposed and unexposed<br><br><i>Case-control study</i> —For matched studies, give matching criteria and the number of controls per case                                                                                                                                                                                                                                                     |                      |
| Variables            | 7        | Clearly define all outcomes, exposures, predictors, potential confounders, and effect modifiers. Give diagnostic criteria, if applicable                                                                                                                                                                                                                                                                                                                                       |                      |

| Section and Item             | Item No. | Recommendation                                                                                                                                                                                                                                                                                            | Reported on Page No. |
|------------------------------|----------|-----------------------------------------------------------------------------------------------------------------------------------------------------------------------------------------------------------------------------------------------------------------------------------------------------------|----------------------|
| Data Sources/<br>Measurement | 8*       | For each variable of interest, give sources of data and details of methods of assessment (measurement). Describe comparability of assessment methods if there is more than one group                                                                                                                      |                      |
| Bias                         | 9        | Describe any efforts to address potential sources of bias                                                                                                                                                                                                                                                 |                      |
| Study Size                   | 10       | Explain how the study size was arrived at                                                                                                                                                                                                                                                                 |                      |
| Quantitative Variables       | 11       | Explain how quantitative variables were handled in the analyses. If applicable, describe which groupings were chosen and why                                                                                                                                                                              |                      |
| Statistical Methods          | 12       | (a) Describe all statistical methods, including those used to control for confounding                                                                                                                                                                                                                     |                      |
|                              |          | (b) Describe any methods used to examine subgroups and interactions                                                                                                                                                                                                                                       |                      |
|                              |          | (c) Explain how missing data were addressed                                                                                                                                                                                                                                                               |                      |
|                              |          | (d) <i>Cohort study</i> —If applicable, explain how loss to follow-up was addressed<br><i>Case-control study</i> —If applicable, explain how matching of cases and controls was addressed<br><i>Cross-sectional study</i> —If applicable, describe analytical methods taking account of sampling strategy |                      |
|                              |          | (e) Describe any sensitivity analyses                                                                                                                                                                                                                                                                     |                      |
| <b>Results</b>               |          |                                                                                                                                                                                                                                                                                                           |                      |
| Participants                 | 13*      | (a) Report numbers of individuals at each stage of study—eg numbers potentially eligible, examined for eligibility, confirmed eligible, included in the study, completing follow-up, and analysed                                                                                                         |                      |
|                              |          | (b) Give reasons for non-participation at each stage                                                                                                                                                                                                                                                      |                      |
|                              |          | (c) Consider use of a flow diagram                                                                                                                                                                                                                                                                        |                      |
| Descriptive Data             | 14*      | (a) Give characteristics of study participants (eg demographic, clinical, social) and information on exposures and potential confounders                                                                                                                                                                  |                      |
|                              |          | (b) Indicate number of participants with missing data for each variable of interest                                                                                                                                                                                                                       |                      |
|                              |          | (c) <i>Cohort study</i> —Summarise follow-up time (eg, average and total amount)                                                                                                                                                                                                                          |                      |
| Outcome Data                 | 15*      | <i>Cohort study</i> —Report numbers of outcome events or summary measures over time                                                                                                                                                                                                                       |                      |
|                              |          | <i>Case-control study</i> —Report numbers in each exposure category, or summary measures of exposure                                                                                                                                                                                                      |                      |
|                              |          | <i>Cross-sectional study</i> —Report numbers of outcome events or summary measures                                                                                                                                                                                                                        |                      |

| Section and Item         | Item No. | Recommendation                                                                                                                                                                                               | Reported on Page No. |
|--------------------------|----------|--------------------------------------------------------------------------------------------------------------------------------------------------------------------------------------------------------------|----------------------|
| Main Results             | 16       | (a) Give unadjusted estimates and, if applicable, confounder-adjusted estimates and their precision (eg, 95% confidence interval). Make clear which confounders were adjusted for and why they were included |                      |
|                          |          | (b) Report category boundaries when continuous variables were categorized                                                                                                                                    |                      |
|                          |          | (c) If relevant, consider translating estimates of relative risk into absolute risk for a meaningful time period                                                                                             |                      |
| Other Analyses           | 17       | Report other analyses done—eg analyses of subgroups and interactions, and sensitivity analyses                                                                                                               |                      |
| <b>Discussion</b>        |          |                                                                                                                                                                                                              |                      |
| Key Results              | 18       | Summarise key results with reference to study objectives                                                                                                                                                     |                      |
| Limitations              | 19       | Discuss limitations of the study, taking into account sources of potential bias or imprecision. Discuss both direction and magnitude of any potential bias                                                   |                      |
| Interpretation           | 20       | Give a cautious overall interpretation of results considering objectives, limitations, multiplicity of analyses, results from similar studies, and other relevant evidence                                   |                      |
| Generalisability         | 21       | Discuss the generalisability (external validity) of the study results                                                                                                                                        |                      |
| <b>Other Information</b> |          |                                                                                                                                                                                                              |                      |
| Funding                  | 22       | Give the source of funding and the role of the funders for the present study and, if applicable, for the original study on which the present article is based                                                |                      |

\*Give information separately for cases and controls in case-control studies and, if applicable, for exposed and unexposed groups in cohort and cross-sectional studies.

**Once you have completed this checklist, please save a copy and upload it as part of your submission. DO NOT include this checklist as part of the main manuscript document. It must be uploaded as a separate file.**

# BMJ Open

## Clinical outcomes do not correlate with anticancer drug prices: a cross-sectional study in Italy

|                                 |                                                                                                                                                                                                                                                                                                                                                                                                                                                                                                                                                                                                                                                                                                                                                                                                                                          |
|---------------------------------|------------------------------------------------------------------------------------------------------------------------------------------------------------------------------------------------------------------------------------------------------------------------------------------------------------------------------------------------------------------------------------------------------------------------------------------------------------------------------------------------------------------------------------------------------------------------------------------------------------------------------------------------------------------------------------------------------------------------------------------------------------------------------------------------------------------------------------------|
| Journal:                        | <i>BMJ Open</i>                                                                                                                                                                                                                                                                                                                                                                                                                                                                                                                                                                                                                                                                                                                                                                                                                          |
| Manuscript ID                   | bmjopen-2019-033728.R1                                                                                                                                                                                                                                                                                                                                                                                                                                                                                                                                                                                                                                                                                                                                                                                                                   |
| Article Type:                   | Original research                                                                                                                                                                                                                                                                                                                                                                                                                                                                                                                                                                                                                                                                                                                                                                                                                        |
| Date Submitted by the Author:   | 08-Oct-2019                                                                                                                                                                                                                                                                                                                                                                                                                                                                                                                                                                                                                                                                                                                                                                                                                              |
| Complete List of Authors:       | Trotta, Francesco; Department of Epidemiology of the Regional Health Service Lazio,<br>Mayer, Flavia; Istituto Superiore di Sanita<br>Barone-Adesi, Francesco; Universita degli Studi del Piemonte Orientale<br>Amedeo Avogadro,<br>Esposito, Immacolata; Research and Health Foundation<br>Punreddy, Ranadhir; Universita degli Studi del Piemonte Orientale<br>Amedeo Avogadro<br>Da Cas, Roberto; Italian National Institute of Health, National Centre for Epidemiology<br>Traversa, Giuseppe; Italian National Institute of Health, National Centre for Epidemiology<br>Perrone, Francesco; Istituto Nazionale Tumori IRCCS Fondazione Pascale<br>Martini, Nello; Research and Health Foundation,<br>Gyawali, Bishal ; Harvard Medical School<br>Addis, Antonio; Department of Epidemiology of the Regional Health Service Lazio, ; |
| <b>Primary Subject Heading</b>: | Oncology                                                                                                                                                                                                                                                                                                                                                                                                                                                                                                                                                                                                                                                                                                                                                                                                                                 |
| Secondary Subject Heading:      | Health economics, Health policy                                                                                                                                                                                                                                                                                                                                                                                                                                                                                                                                                                                                                                                                                                                                                                                                          |
| Keywords:                       | Drug Costs, Antineoplastic Agents/therapeutic use, Treatment Outcome, Antineoplastic Agents                                                                                                                                                                                                                                                                                                                                                                                                                                                                                                                                                                                                                                                                                                                                              |
|                                 |                                                                                                                                                                                                                                                                                                                                                                                                                                                                                                                                                                                                                                                                                                                                                                                                                                          |

SCHOLARONE™  
Manuscripts

1  
2  
3 **Article type:** Original article  
4  
5

6 **Title:** Clinical outcomes do not correlate with anticancer drug prices: a cross-sectional study in  
7  
8 Italy  
9

10  
11 **Authors:** Francesco Trotta<sup>1</sup>, Flavia Mayer<sup>2</sup>, Francesco Barone-Adesi<sup>3</sup>, Immacolata Esposito<sup>4</sup>,  
12 Ranadhir Punreddy<sup>3</sup>, Roberto Da Cas<sup>2</sup>, Giuseppe Traversa<sup>2</sup>, Francesco Perrone<sup>5</sup>, Nello Martini<sup>4</sup>,  
13 Bishal Gyawali<sup>6,7</sup>, Antonio Addis <sup>1</sup>.  
14  
15  
16

17 **Affiliation:**

- 18 1. Department of Epidemiology, Lazio Regional Health Service, Rome, Italy
- 19 2. Italian National Institute of Health, Rome, Italy
- 20 3. University of Eastern Piedmont, Novara, Italy
- 21 4. Research and Health Foundation, Rome, Italy
- 22 5. National Cancer Institute, G. Pascale Foundation - IRCCS, Naples, Italy
- 23 6. Program on Regulation, Therapeutics and Law, Department of Medicine, Brigham and  
24 Women's Hospital and Harvard Medical School, Boston, Massachusetts, USA.
- 25 7. Department of Oncology, and Division of Cancer Care and Epidemiology, Queen's  
26 University, Kingston, Canada  
27  
28  
29  
30

31 **Corresponding Author:**

32 Antonio Addis  
33 Department of Epidemiology  
34 Lazio Regional Health Service, Rome, Italy Via Cristoforo Colombo 112/Pal.A  
35 00143 Roma/ Rome Italy  
36 Tel: +39 06.99722-139  
37 Fax: +39 06.99722111  
38 ORCID [0000-0003-0962-9959](https://orcid.org/0000-0003-0962-9959)  
39 [agmaddis@gmail.com](mailto:agmaddis@gmail.com)  
40  
41

42 *This research received no specific grant from any funding agency in the public, commercial or not-*  
43 *for-profit sectors*  
44  
45

46 **contributorship statement**

47  
48 FT, NM and AA conceptualized the study; FT, AA, NM, FM, FBA, GT, and RDC designed the study;  
49 FBA, RP, IE and NM were in charge of data extraction and quality control; FM, RDC, and FT  
50 performed the data analysis; FT, RDC, FM, GT, BG, FP and AA drafted the manuscript; all the  
51 authors contributed to the discussion and the interpretation of results, and reviewed the final version  
52 of the manuscript. All authors approved the final manuscript as submitted.  
53  
54

55 The authors have no conflicts of interest relevant to this article to disclose and all authors work for  
56 public Universities, Public Institutions or non-profit organizations  
57  
58



1  
2  
3 **Running head.** Anticancer drug prices and clinical outcomes in Italy  
4

5 **Word Count:** 2950  
6  
7

8 **Abstract:**  
9

10  
11 **Objective** To investigate whether the prices of new anticancer drugs correlated with their relative  
12 benefit despite negotiation.  
13  
14

15  
16 **Design** Retrospective cross-sectional study correlating new anticancer drugs prices with clinical  
17 outcomes.  
18  
19

20  
21  
22 **Setting** We did a retrospective cross-sectional study including all new anticancer drugs approved by  
23 the European Medicines Agency (2010-2016) and reimbursed in Italy.  
24  
25

26  
27 **Main Outcome(s) and Measure(s)** Information on clinical outcomes - in terms of median Overall  
28 Survival (OS), median Progression Free Survival (PFS) and Objective Response Rate (ORR) - was  
29 extracted from pivotal trials as reported in the European Public Assessment Reports available on the  
30 EMA website. Cost of a full course treatment was estimated on negotiated official and discounted  
31 prices. Regression coefficients  $\beta$ , their levels of significance  $p$  and the coefficients of determination  
32  $R^2$  were estimated adjusting by tumour type.  
33  
34  
35  
36  
37  
38  
39  
40  
41

42 **Results** Overall, 30 new anticancer drugs (with 35 indications) were available for analysis. There was  
43 no correlation between the improvement in median OS (in weeks) and negotiated price ( $R^2= 0.067$ ,  $n$   
44 = 16 drugs for 17 indications). When the clinical outcomes were expressed as improvements in  
45 median PFS or ORR, 25 drugs (29 indications) were available for analysis, and again, there was no  
46 correlation with prices ( $R^2= 0.004$  and  $0.006$ , respectively).  
47  
48  
49  
50  
51  
52  
53

54 **Conclusions and Relevance:** Our results suggest that the prices of anticancer drugs in Italy do not  
55 reflect their therapeutic benefit. Drug price negotiations, which is mandatory by law in Italy, do not  
56  
57  
58  
59  
60

1  
2  
3 seem to ensure that prices correlate with clinical benefits provided by cancer drugs. These results call  
4  
5 for further efforts to establish the standard determinants of drug prices available at the time of  
6  
7 negotiation. These findings need to be confirmed in other countries where price negotiations are in  
8  
9 place.  
10  
11  
12

### 13 **Strengths and limitations of this study,**

14  
15

- 16 • This study is the first attempt to evaluate whether there were better correlations between  
17 cancer drug prices and clinical outcomes in a setting where central price negotiations are  
18 mandatory for every new medicine.  
19  
20  
21  
22
- 23 • This understanding is important for cancer policy decisions.  
24  
25  
26
- 27 • In our analysis, the relationship between the clinical outcome and cost of anticancer drugs  
28 was ascertained by a simple linear regression model.  
29  
30  
31
- 32 • Clinical outcome, which was the dependent variable, was expressed as absolute or percent  
33 differences in outcomes between treatment and control groups.  
34  
35  
36  
37
- 38 • The main limitations of our study concern data completeness on clinical outcome and price.  
39  
40 We used, as an estimate of benefit, data from pivotal trials retrieved from EPARs.  
41  
42  
43  
44  
45  
46  
47  
48  
49  
50  
51  
52  
53  
54  
55  
56  
57  
58  
59  
60

## Background

High costs of cancer drugs and resulting financial toxicity to cancer patients are now a well-recognized problem in cancer policy throughout the world [1-8]. Various solutions are being proposed to address this problem, of which price negotiations with pharmaceutical companies is proposed as an important strategy especially in the USA [9-11]. Because the Medicare is not allowed to negotiate prices with companies, despite being mandated to cover for every U.S. Food and Drug Administration (FDA) approved drug, various experts have argued that this is the reason for high drug prices in the USA. Indeed, cancer drug prices far exceed the costs of their development [12]; such negotiations might help to lower the prices of cancer drugs as evidenced by lower cost of cancer drugs in other developed countries compared with the USA.

However, little is known about if such negotiations would lead to better correlation between cancer drug prices and the benefits they provide. Studies have shown that drug prices do not correlate with clinical benefits for cancer drugs approved by the FDA, even though such studies have not taken central price negotiations into account [13,14]. Countries such as the United Kingdom and Italy negotiate prices and hence, the correlations might be different.

In Italy, drug price negotiation based on cost-effectiveness evaluation has been mandatory since 2001 for all medicines reimbursed by the National Health Service (NHS) [15,16]. We analysed the correlation between the prices of cancer drugs in Italy with their clinical outcomes to test the hypothesis that central price negotiations leads to better alignment of prices and benefits.

## Methods:

### *Identification of the study sample*

All new drugs approved by the EMA via a centralized procedure between January 2010 and June 2016 for the treatment of either solid or haematologic cancers were initially identified. Generics, biosimilars, interferons and granulocyte-colony stimulating factors (G-CSFs) were excluded. Only anticancer drugs with pivotal trials based on overall survival (OS), progression-free survival (PFS) or objective response rate (ORR) and with prices that were officially negotiated in Italy by 31<sup>st</sup> December 2016 were included in the cohort for analyses.

### *Data extraction*

Information on the clinical outcomes (in terms of median OS, median PFS, ORR) was extracted by two co-investigators (FBA and RP) from pivotal trials that compared new treatments with controls as reported in the European Public Assessment Reports - EPARs (summary table of the main study, Section 2.5.2) publicly available on the EMA website ([www.ema.europa.eu](http://www.ema.europa.eu)). Survival times were expressed in weeks, and the reported OS and PFS were transformed when necessary. Information on therapeutic indication and tumour type were also retrieved.

### *Drug prices*

The cost of a full course or 1-year treatment was estimated by two co-investigators (NM and IE) on the basis of the negotiated official ex-factory price (in euros) of drug packages, as published in the Official Gazette of the Italian Republic ([www.gazzettaufficiale.it](http://www.gazzettaufficiale.it)) and taking into account the posology as reported in the Summary of Product Characteristics (SPC). To compare prices of drugs with different schedules, in the text we refer to drug prices as the cost of a full course or a 1-year treatment. A further estimate took into account additional compulsory rebates [17] or extra-discounts

1  
2  
3 that were agreed with pharmaceutical companies; this information is confidential to the public but is  
4 released to procurement stations within the Italian NHS (e.g., regions, hospitals, and local health  
5 units).  
6  
7  
8  
9

### 10 *Statistical analysis*

11  
12  
13  
14 The following variables were extracted and analysed descriptively: year of approval, therapeutic  
15 indication, type of treatment and control groups, outcome data, official and confidential costs per  
16 treatment (1 year or a full course) and regulatory information (conditional/under exceptional  
17 circumstances approval, or orphan drug status).  
18  
19  
20  
21  
22  
23

24 The relationship between the clinical outcomes and cost of anticancer drugs was ascertained by a  
25 simple linear regression model. Clinical outcome, which was the dependent variable, was expressed  
26 as absolute or percent differences in outcomes between treatment and control groups. Regression  
27 coefficients  $\beta$ , their levels of significance  $p$  and the coefficients of determination  $R^2$  were reported  
28 for each model.  
29  
30  
31  
32  
33  
34

35  
36 We also performed several sensitivity analyses to test the robustness of the results. Specifically, we  
37 performed multiple linear regression with tumour type as the independent variable to take into  
38 account potential differences due to tumour characteristics. Moreover, we also repeated the analysis  
39 after excluding negative outcome differences (in two cases, one of the outcomes was inferior in the  
40 group receiving the new drug than in the comparison group) and actively controlled trials (considering  
41 only placebo-controlled trials). Subgroup analysis by tumour type was also attempted as exploratory  
42 analysis when a minimum number of two anticancer drugs within the same tumour type setting were  
43 observed. Outlier cases were not excluded from the analyses, but their impact was evaluated and  
44 reported when relevant as a separate analysis. All statistical analyses were performed using STATA  
45 (Statacorp, version 14.0)  
46  
47  
48  
49  
50  
51  
52  
53  
54  
55  
56  
57  
58  
59  
60

1  
2  
3  
4  
5  
6  
7  
8  
9  
10  
11  
12  
13  
14  
15  
16  
17  
18  
19  
20  
21  
22  
23  
24  
25  
26  
27  
28  
29  
30  
31  
32  
33  
34  
35  
36  
37  
38  
39  
40  
41  
42  
43  
44  
45  
46  
47  
48  
49  
50  
51  
52  
53  
54  
55  
56  
57  
58  
59  
60

*Patient and public involvement*

Patients have not been involved in the development of the research question or the design of this study. However, results of this analysis will be disseminated throughout public conferences, with statements summarizing our results, and with an open access to the published report posted in our institutional websites

For peer review only

## Results

From 2010 to mid-2016, 45 new anticancer drugs for 56 different oncology indications were approved via centralized procedures by the EMA. For 40 new anticancer drugs (47 indications), the basis for the approval was a pivotal trial adopting OS, PFS or ORR as a primary outcome; the price negotiation was completed by December 2016 for only 30 new anticancer drugs (35 indications) which are included in our analysis (Table 1). Seven drugs received orphan drug status by the EMA and two (vandetanib and crizotinib) received conditional approval. Of the 35 oncology indications tested in 35 different pivotal trials which were all controlled clinical trials, the commonest indications were melanoma (7 out of 35), followed by haematological cancer (6 out of 35) and non-small cell lung cancer (4 out of 35). In 15 such trials (43%), placebo was used as the control arm. Of the 35 indications, data on OS, PFS and ORR were available for 17, 29 and 29 indications respectively. Each drug-indication pair contributed to one or more of these analyses, depending on which outcomes were reported in the EPAR.

In the treatment groups, the median improvement in the OS and PFS were 11.4 weeks (IQR 8.8-17.2; min 13.2; max 23.5) and 12.8 weeks (IQR 6.4-17; min -7.48; max 58.8), respectively; median ORR improvement in the treatment group was 21.8% (IQR 10-34.6; min -3; max 63.3). The reported ranges have negative minimum values since in two cases - nivolumab for NSCLC and regorafenib for gastrointestinal stromal tumours - the experimental treatment had a negative effect on one of the outcomes compared to the control group (in terms of PFS for nivolumab and ORR for regorafenib). The median negotiated price for a 1-year treatment was 72,392 euros (IQR 53,819-85,800; min 4,942; max 142,785), which was further discounted by 25% (on average) after applying confidential rebates. For all anticancer drugs but ipilimumab the price was calculated as 1-year treatment since the posology reported in the Summary of Product Characteristics (SPC) reported that the treatment should

1  
2  
3 continue as long as clinical benefit is observed or until unacceptable toxicity occurs. In the case of  
4  
5 ipilimumab the price was calculated as a course of 4 doses as reported in the SPC.  
6  
7

8  
9 The official (ex-factory) price of new anticancer drugs and absolute clinical outcomes showed no  
10  
11 correlation (Figure 1a-c). The relationship between the improvement in median OS (in weeks) and  
12  
13 negotiated price was estimated for 16 drugs (17 indications), and no correlation was observed ( $R^2=$   
14  
15 0.067). When clinical outcomes were expressed as absolute advantage in median PFS or ORR, 25  
16  
17 drugs (29 indications) were available for analysis, and in these cases, no correlation was observed  
18  
19 ( $R^2= 0.004$  and  $0.006$ , respectively).  
20  
21

22  
23 Repeating the analyses and taking into account the additional confidential rebates, which are  
24  
25 compulsory for hospital procurement, no improvement in the benefit/price relationships was  
26  
27 highlighted (Figure 2a-c). These findings also remained unchanged when the analyses were repeated  
28  
29 with adjustments for tumour type (Supplementary Table 1) or when clinical outcome was expressed  
30  
31 as a percentage of improvement instead of as an absolute difference (Supplementary Figure 1a-c).  
32  
33 Sensitivity analyses that excluded negative improvements in outcomes over a control group  
34  
35 (Supplementary Figure 2) and considered only data from placebo controlled trials (Supplementary  
36  
37 Figure 3a,b) confirmed the main analysis. The exploratory subgroup analyses by tumour type did not  
38  
39 identify specific positive correlation patterns depending on tumour setting (Supplementary Figure 4  
40  
41  
42  
43  
44 a,b).  
45  
46  
47  
48  
49  
50  
51  
52  
53  
54  
55  
56  
57  
58  
59  
60



## Discussion

This study is the first attempt to evaluate whether there were better correlations between cancer drug prices and clinical outcomes in a setting where central price negotiations are mandatory for every new medicine. Our study gave unexpected results to the research question, highlighting no relationships between cost of cancer drugs and benefits. Moreover, all pre-specified sensitivity and subgroup analyses confirmed the main findings. This finding will have important policy implications both for countries like USA where price negotiations are absent and for other countries like Italy where price negotiations do exist.

In our study, the correlation between drug costs and clinical outcomes was even lower than the ones previously noted in the US context [13,14], showing that negotiations did not tilt the relationship between drug prices and benefit positively. Thus, higher drug pricing remains despite the Italian legislative environment, where approval based on cost-effectiveness analysis and price negotiations have been mandatory by law since 2001 [15,16]. This finding may cast doubts on the role of the negotiation itself. However, it is important to understand that countries like Italy that negotiate drug prices do such negotiations only for binary decisions of approval or no-approval, no taking into account, during negotiation, of a clear correlation between prices and benefits. This understanding is important for cancer policy decisions.

Indeed, there is no legal policy in any country to negotiate prices differently for drugs approved on the basis of surrogate endpoints versus survival outcomes or drugs that improve survival in days versus those that improve survival in months or drugs with immature benefit risk profiles [18-22]. Although steps in the right direction, in lack of such policy, the value frameworks proposed by organizations such as ASCO, ESMO or NCCN have become little more than intellectual exercises [23-26].

1  
2  
3  
4  
5  
6 Another reason price negotiations did not achieve better price-value correlations is that because of  
7  
8 the global market of drugs, each single country - although large – only represents a small portion of  
9  
10 the consumer market. Thus, companies “wield the stick”, setting the maximum price that the market  
11  
12 will bear [27]. In addition, in Italy, no threshold for incremental cost-effectiveness ratio (ICER) has  
13  
14 been determined; thus, no limit is in place to be used as a decision rule in resource allocation at the  
15  
16 time of negotiation/reimbursement decisions. The lack of such kind of cut-off might have contributed  
17  
18 to the negative results in our study. However, we recognize that even when a threshold for ICER is  
19  
20 well established, such as in the UK [28], continuous exceptions have been allowed in the case of  
21  
22 anticancer drugs. For example, an ad hoc fund established in 2010 (i.e., the Cancer Drug Fund,) was  
23  
24 recently dismissed by the Parliament because it did not deliver meaningful value to patients or society  
25  
26 [29].  
27  
28  
29  
30  
31

32 In the EU context (where newer anticancer drugs are approved by EMA without considering the  
33  
34 added-value or cost-effectiveness), the complexity further increases because once a marketing  
35  
36 authorization is granted, it may become difficult to manage the reimbursement issue at a national  
37  
38 level [30]. Moreover, it is also difficult for payers (NHS/insurance) to defend the thesis against the  
39  
40 public opinion that an anticancer drug cannot be reimbursed because it is too expensive [30, 31].  
41  
42 Indeed, as our study shows, the confidential discounts following negotiations between a member state  
43  
44 and a company do not ameliorate the correlation between treatment costs and benefits even though  
45  
46 they reduce absolute drug prices.  
47  
48  
49  
50

51 Another factor that negatively influences the contractual power of negotiation is non-transparent  
52  
53 information on drug prices across countries. Difficulties in retrieving full information on prices have  
54  
55 been already recognized in a recent survey comparing prices of anticancer drugs in 16 EU countries,  
56  
57  
58  
59  
60

1  
2  
3 Australia and New Zealand [32]. Vogler et al. found that price information is scarce and not disclosed  
4 due to confidential discounts or MEAs, calling for higher transparency. The authors state that it is in  
5 the interest of policy makers to remove clauses limiting disclosure on price information because they  
6 risk overpaying when setting prices through external price referencing. This concern might be  
7 relevant in the Italian context since the negotiation procedure for reimbursement takes into account  
8 the price in other EU countries as well as the price of similar products within the same  
9 pharmacotherapeutic group [33].

10  
11  
12 We believe that two partly independent approaches could be adopted by policy makers to achieve a  
13 better balance between cancer drug prices and benefits. First, price negotiations should be more  
14 strictly based on the level of evidence as well as the magnitudes of benefit. An ICER measure (such  
15 as QALY) should represent a threshold for reimbursement, thus setting a starting point for price  
16 negotiation and adjusting the ICER threshold based on the magnitude of the relative benefit reached.  
17 If the information on the relative value is not available at the time of approval, comparisons can be  
18 performed using indirect techniques, whereas after entering the market, payers should play a major  
19 role in supporting the evidence generating process.

20  
21  
22 The second approach that could attain lower prices would require an increased transparency on the  
23 costs of drug development process, including the relative contributions from academia and public  
24 sector to the development of a drug [34-38]. For instance, research conducted to evaluate efforts of  
25 drug development processes highlighted that about half of the most transformative drugs approved  
26 by the FDA had substantial contributions to their development by academic researchers supported by  
27 government funding [34,35]; in addition, it has been estimated that the cost of late clinical  
28 development takes a limited part of the whole process [36]. It is probably the right time to  
29 appropriately acknowledge the contributions of publicly funded research during drug price  
30 negotiation with companies. Often, comparative effectiveness research is funded by public

1  
2  
3 institutions to test different treatments in real practice on robust outcomes with longer follow up or  
4  
5 special populations [37,38]. The findings of these studies should be linked to a continuous price re-  
6  
7 negotiation over the life cycle of a product.  
8  
9

10  
11 Other approaches identified as possible solutions to keep the health system sustainable address the  
12  
13 general governance of the system, i.e., when the price is already set. In fact, a price-volume approach  
14  
15 [39] or indication-based pricing [40,41] have been modelled, each presenting pros and cons.  
16  
17 Moreover, given that different oncology settings appear to be oligopolistic, thus refraining from price  
18  
19 competition, another possible solution comes from national/regional tenders among therapeutic  
20  
21 categories when more alternatives are available [42].  
22  
23  
24

25  
26 The main limitations of our study concern data completeness on clinical outcome and price. We used,  
27  
28 as an estimate of benefit, data from pivotal trials retrieved from EPARs. Moreover, we are not aware  
29  
30 if further (more robust) data became available at a later stage when the price was negotiated at the  
31  
32 national level. In fact, in Italy, the Health Technology Assessment reports used for cost effective  
33  
34 analysis at the time of reimbursement decisions are not publicly available. Regarding the price  
35  
36 estimate, we estimated the treatment costs for 1-year treatment or for the total course in the case of  
37  
38 ipilimumab where the treatment course lasts less than 1 year. However, the exclusion of ipilimumab  
39  
40 would not alter the main findings. Another important limitation is that we have not considered quality  
41  
42 of life outcomes as another metric of clinical benefit. Furthermore, a recent study has shown that  
43  
44 quality of life outcomes are not routinely collected or published, and that the tools used to measure  
45  
46 quality of life are varied to have a uniform metric for comparison [43]. Although we have included  
47  
48 surrogate measures such as PFS or ORR as clinical outcomes in our analysis because they were  
49  
50 considered as the basis for approval by the regulatory agency, these surrogate measures do not always  
51  
52 correlate with true clinical benefits in terms of improved survival or improved quality of life [43,44].  
53  
54  
55  
56  
57  
58  
59  
60

1  
2  
3 Moreover, additional savings were calculated “a posteriori” from the Managed Entry Agreements in  
4 place in Italy (whose information is not publicly available) and were not considered in the analyses.  
5  
6  
7 Another factor that might have impacted the price estimation is the rebate obtained at the  
8 regional/local level following drug tenders. However, this information was not available for the  
9  
10 analyses and would have been not generalizable at the national level. Our study is a retrospective  
11  
12 cross-sectional correlation study that aimed at evaluating whether central price negotiation  
13  
14 (mandatory by law in Italy) leads to better alignment of prices and the benefits known at the time of  
15  
16 drug approval. This means that our analysis is not aimed at comparing costs and outcomes within  
17  
18 drug classes, as a typical cost effective study, and we never intended to assess the add values of the  
19  
20 approved drugs in the context of all other drugs sharing the same indication. The “population”/cohort  
21  
22 approach that we adopted has the intrinsic limitation of including drugs approved for different  
23  
24 indications or different cancer types (with various incidence/prevalence) based on different clinical  
25  
26 data packages. The consequent heterogeneity stemming from this approach was resolved adjusting  
27  
28 the correlation analyses by tumour type or conducting several sub-analyses. Following this approach,  
29  
30 we found results consistent with primary findings thus confirming the robustness of methods and  
31  
32 results.  
33  
34  
35  
36  
37  
38  
39

## 40 **Conclusion**

41  
42  
43 Our results suggest that price negotiations for approval decisions alone may not bring balance  
44  
45 between prices and benefits of anticancer drugs. Other strategies, such as value based price  
46  
47 negotiations, price negotiations strictly based on strength of evidence and price transparencies may  
48  
49 be necessary to better achieve the drug prices and benefits balance. These results need to be confirmed  
50  
51 in other countries where a national price negotiation exists.  
52  
53  
54  
55  
56  
57  
58  
59  
60

1  
2  
3  
4  
5  
6  
7  
8  
9  
10  
11  
12  
13  
14  
15  
16  
17  
18  
19  
20  
21  
22  
23  
24  
25  
26  
27  
28  
29  
30  
31  
32  
33  
34  
35  
36  
37  
38  
39  
40  
41  
42  
43  
44  
45  
46  
47  
48  
49  
50  
51  
52  
53  
54  
55  
56  
57  
58  
59  
60

### **Contributorship statement**

FT, NM and AA conceptualized the study; FT, AA, NM, FM, FBA, GT, and RDC designed the study; FBA, RP, IE and NM were in charge of data extraction and quality control; FM, RDC, and FT performed the data analysis; FT, FM, AA, GT, BG, and RDC drafted the manuscript; All the authors contributed to the discussion and the interpretation of results, and reviewed the final version of the manuscript. All authors approved the final manuscript as submitted.

### **Competing interests**

The authors have no competing of interest relevant to this article to disclose and all authors works for public Universities, Public Institutions or not for profit Organizations.

### **Funding**

None.

### **Data Availability**

All data presented in the analysis have been extracted by public documents (EPARs for each drug outcomes and clinical data; regional and national administrative official documents (i.e. Gazzetta Ufficiale for prices). Data are available upon reasonable request

**References:**

- 1) Quintiles IMS Institute. Outlook for Global Medicines through 2021. December 2016. 1-54.  
[http://www.imshealth.com/en/thought-leadership-quintilesims-institute/reports/outlook\\_for\\_global\\_medicines\\_through\\_2021](http://www.imshealth.com/en/thought-leadership/quintilesims-institute/reports/outlook_for_global_medicines_through_2021)
- 2) Ghinea N, Lipworth W, Kerridge I. Propaganda or the cost of innovation? Challenging the high price of new drugs. *BMJ*. 2016; 352: i1284, doi: 10.1136/bmj.i1284.
- 3) European Commission - Press release. Antitrust: Commission opens formal investigation into Aspen Pharma's pricing practices for cancer medicines. Brussels, 15 May 2017.  
[http://europa.eu/rapid/press-release\\_IP-17-1323\\_en.htm](http://europa.eu/rapid/press-release_IP-17-1323_en.htm)
- 4) Gordon N, Stemmer SM, Greenberg D, et al. Trajectories of Injectable Cancer Drug Costs After Launch in the United States. *J Clin Oncol*. 2018; 36: 319-325.
- 5) Narang AK, Nicholas LH. Out-of-Pocket Spending and Financial Burden Among Medicare Beneficiaries With Cancer. *JAMA Oncol*. 2017; 3:757-765.
- 6) Shankaran V, Ramsey S. Addressing the Financial Burden of Cancer Treatment: From Copay to Can't Pay. *JAMA Oncol*. 2015; 1:273-4.
- 7) Liz Szabo. Cancer patients skipping medicines or delaying treatment due to high drug prices. *STAT* 15 March, 2017. <https://www.statnews.com/2017/03/15/cancer-patients-drug-prices/>
- 8) de Souza JA, Conti RM. Mitigating Financial Toxicity Among US Patients With Cancer. *JAMA Oncol*. 2017; 3: 765-766.
- 9) Kesselheim AS, Avorn J, Sarpatwari A. The High Cost of Prescription Drugs in the United States: Origins and Prospects for Reform. *JAMA*. 2016; 316: 858-71.
- 10) Hwang TJ, Kesselheim AS, Sarpatwari A. Value-Based Pricing and State Reform of Prescription Drug Costs. *JAMA*. 2017; 318: 609-610,

- 1  
2  
3 11) Fralick M, Avorn J, Kesselheim AS. The Price of Crossing the Border for Medications. N  
4  
5 Engl J Med. 2017; 377: 311-313.  
6  
7  
8 12) Tay-Teo K1, Ilbawi A, Hill SR. Comparison of Sales Income and Research and  
9  
10 Development Costs for FDA-Approved Cancer Drugs Sold by Originator Drug Companies.  
11  
12 JAMA Netw Open. 2(1):e186875, 2019. doi: 10.1001/jamanetworkopen.2018.6875.  
13  
14  
15 13) Mailankody S, Prasad V. Five Years of Cancer Drug Approvals: Innovation, Efficacy, and  
16  
17 Costs. JAMA Oncol. 2015; 1: 539-40, Erratum in: JAMA Oncol. 2015; 1: 544.  
18  
19  
20 14) Vivot A, Jacot J, Zeitoun JD, et al. Clinical benefit, price and approval characteristics of  
21  
22 FDA-approved new drugs for treating advanced solid cancer, 2000-2015. Ann Oncol. 2017;  
23  
24 28:1111-1116.  
25  
26  
27 15) Comitato Interministeriale per la Programmazione Economica. Individuazione dei criteri per  
28  
29 la contrattazione del prezzo dei farmaci (Deliberazione n.3/2001). Official Gazette of the  
30  
31 Italian Republic. N. 73 del 28-03-2001.  
32  
33 <http://www.gazzettaufficiale.it/eli/id/2001/03/28/001A3188/sg>  
34  
35  
36 16) Italian Parliament. Legge 24 novembre 2003, n. 326. Conversione in legge, con  
37  
38 modificazioni, del decreto-legge 30 settembre 2003, n. 269, recante disposizioni urgenti per  
39  
40 favorire lo sviluppo e per la correzione dell'andamento dei conti pubblici. Official Gazette of  
41  
42 the Italian Republic. N. 274; 25 November 2003.  
43  
44 <http://www.parlamento.it/parlam/leggi/03326l.htm>  
45  
46  
47 17) Italian Parliament . Legge 27 December 2006, n. 296. Art. 1 comma 796, lettera g).  
48  
49 Disposizioni per la formazione del bilancio annuale e pluriennale dello Stato (finanziaria  
50  
51 2007). Official Gazette of the Italian Republic. N. 299; 27 December 2006, Suppl ord. n.  
52  
53 244.  
54  
55  
56  
57  
58  
59  
60



- 1  
2  
3 18) Apolone G, Joppi R, Bertelè V, et al. Ten years of marketing approvals of anticancer drugs  
4  
5 in Europe: regulatory policy and guidance documents need to find a balance between  
6  
7 different pressures. *Br J Cancer*. 2005; 93: 504-9.  
8  
9
- 10 19) Bertele' V, Banzi R, Capasso F, et al. Haematological anticancer drugs in Europe: any added  
11  
12 value at the time of approval? *Eur J Clin Pharmacol*. 2007; 63: 713-9.  
13  
14
- 15 20) Trotta F, Apolone G, Garattini S, et al. Stopping a trial early in oncology: for patients or for  
16  
17 industry? *Ann Oncol*. 2008; 19: 1347-53. doi: 10.1093/annonc/mdn042. Epub 2008 Feb 27  
18  
19
- 20 21) Kim C, Prasad V. Cancer Drugs Approved on the Basis of a Surrogate End Point and  
21  
22 Subsequent Overall Survival: An Analysis of 5 Years of US Food and Drug Administration  
23  
24 Approvals. *JAMA Intern Med*. 2015; 175: 1992-4.  
25
- 26 22) Banzi R, Gerardi C, Bertele' V, et al. Approvals of drugs with uncertain benefit-risk profiles  
27  
28 in Europe. *Eur J Intern Med*. 2015; 26: 572-84.  
29
- 30 23) Salas-Vega S, Iliopoulos O, Mossialos E. Assessment of Overall Survival, Quality of Life,  
31  
32 and Safety Benefits Associated with New Cancer Medicines. *JAMA Oncol*. 2017; 3:382-  
33  
34 390.  
35  
36
- 37 24) Wise PH. Cancer drugs, survival, and ethics. *BMJ* 2016; 355: i5792  
38  
39 <https://doi.org/10.1136/bmj.i5792> (Published 09 November 2016)  
40  
41
- 42 25) Del Paggio JC, Sullivan R, Schrag D, et al. Delivery of meaningful cancer care: a  
43  
44 retrospective cohort study assessing cost and benefit with the ASCO and ESMO  
45  
46 frameworks. *Lancet Oncol*. 2017; 18: 887-894.  
47  
48
- 49 26) Sobrero A1, Bruzzi P. Incremental advance or seismic shift? The need to raise the bar of  
50  
51 efficacy for drug approval. *J Clin Oncol*. 2009; 27:5868-73.  
52  
53
- 54 27) Ramsey SD, Lyman GH, Bangs R. Addressing Skyrocketing Cancer Drug Prices Comes  
55  
56 with Trade-offs: Pick Your Poison. *JAMA Oncol*. 2016; 2: 425-6.  
57  
58  
59  
60

- 1  
2  
3 28) Dillon A. Carrying NICE over the threshold. NICE. 19 February 2015.  
4  
5 <https://www.nice.org.uk/news/blog/carrying-nice-over-the-threshold>  
6  
7  
8 29) Aggarwal A, Fojo T, Chamberlain C, et al. Do patient access schemes for high-cost cancer  
9  
10 drugs deliver value to society? -lessons from the NHS Cancer Drugs Fund. *Ann Oncol*.  
11  
12 2017; 28: 1738–1750. doi: 10.1093/annonc/mdx110  
13  
14 30) Cohen D. Cancer drugs: high price, uncertain value. *BMJ*. 2017; 359: j4543.  
15  
16 31) Prasad V. Do cancer drugs improve survival or quality of life? *BMJ*. 2017; 359: j4528  
17  
18 32) Vogler S, Vitry A, Babar ZU. Cancer drugs in 16 European countries, Australia, and New  
19  
20 Zealand: a cross-country price comparison study. *Lancet Oncol*. 2016; 17: 39-47,  
21  
22  
23 33) Folino-Gallo P, Montilla S, Bruzzone M, et al. Pricing and reimbursement of  
24  
25 pharmaceuticals in Italy. *Eur J Health Econ*. 2008; 9:305-10.  
26  
27 34) Stevens AJ, Jensen JJ, Wyller K, et al. The role of public-sector research in the discovery of  
28  
29 drugs and vaccines. *N Engl J Med*. 2011; 364: 535-41.  
30  
31 35) Kesselheim AS, Tan YT, Avorn J. The roles of academia, rare diseases, and repurposing in  
32  
33 the development of the most transformative drugs. *Health Aff (Millwood)*. 2015; 34: 286-  
34  
35 93.  
36  
37 36) Martin L, Hutchens M, Hawkins C, et al. How much do clinical trials cost? *Nat Rev Drug*  
38  
39 *Discov*. 2017; 16: 381-382.  
40  
41 37) Italian Medicines Agency (AIFA) Research & Development Working Group. Feasibility  
42  
43 and challenges of independent research on drugs: the Italian medicines agency (AIFA)  
44  
45 experience. *Eur J Clin Invest*. 2010; 40: 69-86.  
46  
47 38) Traversa G, Masiero L, Sagliocca L, et al. Italian program for independent research on  
48  
49 drugs: 10-year follow-up of funded studies in the area of rare diseases. *Orphanet J Rare Dis*.  
50  
51 2016; 11: 36.  
52  
53  
54  
55  
56  
57  
58  
59  
60

- 1  
2  
3 39) Messori A. Application of the Price-Volume Approach in Cases of Innovative Drugs Where  
4 Value-Based Pricing is Inadequate: Description of Real Experiences in Italy. *Clin Drug*  
5 *Investig.* 2016; 36: 599-603.  
6  
7  
8  
9  
10 40) Bach PB. Indication-specific pricing for cancer drugs. *JAMA.* 2014; 312:1629-30.  
11  
12 41) Chandra A, Garthwaite C. The Economics of Indication-Based Drug Pricing. *N Engl J Med.*  
13 2017; 377:103-106..  
14  
15  
16 42) Kantarjian H, Rajkumar SV. Why are cancer drugs so expensive in the United States, and  
17 what are the solutions? *Mayo Clin Proc.* 2015; 90:500-4..  
18  
19  
20 43) Hwang TJ, Gyawali B. Association between progression-free survival and patients' quality  
21 of life in cancer clinical trials. *Int J Cancer.* 2019; 144:1746-1751. doi: 10.1002/ijc.31957.  
22  
23  
24 44) Prasad V, Kim C, Burotto M, Vandross A. The Strength of Association Between Surrogate  
25 End Points and Survival in Oncology: A Systematic Review of Trial-Level Meta-analyses.  
26 *JAMA Intern Med.* 2015; 175:1389-98. doi: 10.1001/jamainternmed.2015.2829.  
27  
28  
29  
30  
31  
32  
33  
34  
35  
36  
37  
38  
39  
40  
41  
42  
43  
44  
45  
46  
47  
48  
49  
50  
51  
52  
53  
54  
55  
56  
57  
58  
59  
60

1  
2  
3  
4  
5  
6  
7  
8  
9  
10  
11  
12  
13  
14  
15  
16  
17  
18  
19  
20  
21  
22  
23  
24  
25  
26  
27  
28  
29  
30  
31  
32  
33  
34  
35  
36  
37  
38  
39  
40  
41  
42  
43  
44  
45  
46  
47  
48  
49  
50  
51  
52  
53  
54  
55  
56  
57  
58  
59  
60

For peer review only

**Table 1.** Characteristics of the 30 anticancer drugs included in the analysis.

| Medicine Name | Active Substance               | Clinical setting                                                                                               | Treatment group                                                 | Control group                                       | PFS TRT (median in weeks) | PFS CRT (median in weeks) | OS TRT (median in weeks) | OS CRT (median in weeks) | ORR TRT (%) | ORR CRT (%) | Year First Auth. | Official negot. price (€) | Disc. price (€) |
|---------------|--------------------------------|----------------------------------------------------------------------------------------------------------------|-----------------------------------------------------------------|-----------------------------------------------------|---------------------------|---------------------------|--------------------------|--------------------------|-------------|-------------|------------------|---------------------------|-----------------|
| Teysuno       | tegafur / gimeracil / oteracil | advanced gastric cancer in combination with cisplatin.                                                         | teysuno 25 mg/m + cisplatin 75 mg/m2                            | 5-fluorouracil 1000 mg/m2 /24 + cisplatin 100 mg/m2 |                           |                           | 34.4                     | 31.6                     |             |             | 2011             | 4942                      | 3479            |
| Jevtana       | cabazitaxel                    | hormone-refractory metastatic prostate cancer .                                                                | cabazitaxel + prednisone                                        | mitoxantrone + prednisone                           | 11.2                      | 5.6                       | 60.4                     | 50.8                     | 14.4        | 4.4         | 2011             | 52983                     | 38254           |
| Yervoy        | ipilimumab                     | advanced (unresectable or metastatic) melanoma                                                                 | ipilimumab + placebo                                            | peptide vaccine glycoprotein 100 (gp100)            | 11.04                     | 11.04                     | 39.8                     | 25.8                     | 5.7         | 1.5         | 2011             | 71400                     | 45107           |
| Votubia       | everolimus                     | Renal angiomyolipoma associated with tuberous sclerosis complex (TSC)                                          | everolimus                                                      | placebo                                             |                           | 45.48                     |                          |                          | 41.8        | 0           | 2011             | 66521                     | 41424           |
| Votubia       | everolimus                     | Subependymal giant cell astrocytoma (SEGA) associated with tuberous sclerosis complex (TSC)                    | everolimus                                                      | placebo                                             |                           |                           |                          |                          | 34.6        | 0           |                  | 53216                     | 33139           |
| Halaven       | eribulin                       | locally advanced or metastatic breast cancer                                                                   | eribulin 1.23 mg/m2 (equivalent to 1.4 mg/m2 eribulin mesylate) | treatment of physician's choice                     | 16.14                     | 9.71                      | 57.57                    | 45.86                    | 12.2        | 4.7         | 2011             | 32300                     | 28130           |
| Zytiga        | abiraterone acetate            | metastatic castration-resistant prostate cancer                                                                | abiraterone acetate                                             | placebo                                             | 22.4                      | 14.4                      | 68.9                     | 48.7                     | 29.1        | 5.5         | 2011             | 46842                     | 33397           |
| Dacogen       | decitabine                     | newly diagnosed de novo or secondary acute myeloid leukaemia (AML)                                             | decitabine                                                      | patient's choice                                    | 14.8                      | 8.4                       | 30.8                     | 20                       |             |             | 2012             | 54366                     | 34346           |
| Caprelsa      | vandetanib                     | aggressive and symptomatic medullary thyroid cancer (MTC) unresectable locally advanced or metastatic disease. | vandetanib                                                      | placebo                                             | 122                       | 77.2                      |                          |                          | 45          | 13          | 2012             | 67405                     | 53533           |
| Zelboraf      | vemurafenib                    | BRAF-V600-mutation-positive unresectable or metastatic melanoma.                                               | vemurafenib                                                     | dacarbazine                                         | 21.28                     | 6.44                      | 52.8                     | 39.6                     | 48.4        | 5.5         | 2012             | 119929                    | 108236          |
| Xalkori       | crizotinib                     | anaplastic lymphoma kinase (ALK) positive advanced non-small cell lung cancer (NSCLC).                         | crizotinib                                                      | pemetrexed or docetaxel                             | 30.8                      | 12                        |                          |                          | 65.3        | 19.5        | 2012             | 79538                     | 57427           |

|           |                       |                                                                                                                                                       |                                      |                                                                     |       |      |       |       |      |      |      |        |        |
|-----------|-----------------------|-------------------------------------------------------------------------------------------------------------------------------------------------------|--------------------------------------|---------------------------------------------------------------------|-------|------|-------|-------|------|------|------|--------|--------|
| Xalkori   | crizotinib            | first-line treatment of adults with anaplastic lymphoma kinase (ALK) positive advanced non-small cell lung cancer (NSCLC).                            | crizotinib                           | chemotherapy                                                        | 43.6  | 28   |       |       | 74.4 | 45   |      | 79538  | 57427  |
| Inlyta    | axitinib              | advanced renal-cell carcinoma (RCC)                                                                                                                   | axitinib                             | sorafenib                                                           | 26.8  | 18.8 |       |       | 19.4 | 9.4  | 2012 | 57632  | 39295  |
| Perjeta   | pertuzumab            | HER2-positive metastatic or locally recurrent unresectable breast cancer                                                                              | pertuzumab + trastuzumab + docetaxel | placebo + trastuzumab + docetaxel                                   | 74    | 49.6 |       |       | 80.2 | 69.3 | 2013 | 51643  | 46608  |
| Kadcyla   | trastuzumab emtansine | HER2-positive, unresectable locally advanced or metastatic breast cancer                                                                              | trastuzumab emtansine (tdm1)         | lapatinib + capecitabine (lap+cap)                                  | 38.4  | 25.6 | 123.9 | 100.4 |      |      | 2013 | 87215  | 75877  |
| Giotrif   | afatinib              | locally advanced or metastatic non-small cell lung cancer (NSCLC) with activating EGFR mutation(s);                                                   | afatinib (film-coated tablets)       | pemetrexed (lyophilised powder) + cisplatin (solution for infusion) | 44.56 | 27.6 |       |       | 56.1 | 22.6 | 2013 | 29528  | 21853  |
| Stivarga  | regorafenib           | metastatic colorectal cancer (CRC)                                                                                                                    | regorafenib + best supportive care   | placebo + best supportive care                                      | 8.4   | 7.4  | 28    | 21.6  | 1    | 0.4  | 2013 | 85800  | 77434  |
| Stivarga  | regorafenib           | unresectable or metastatic gastrointestinal stromal tumors (GIST)                                                                                     | regorafenib + best supportive care   | placebo + best supportive care                                      | 21    | 4    |       |       | 1.5  | 4.5  |      | 85800  | 77434  |
| Tafinlar  | dabrafenib            | unresectable or metastatic melanoma with a BRAF V600 mutation.                                                                                        | dabrafenib                           | dacarbazine                                                         | 27.6  | 10.8 | 72.8  | 62.4  | 59   | 24   | 2013 | 107935 | 87670  |
| Zaltrap   | aflibercept           | metastatic colorectal cancer (MCRC)                                                                                                                   | aflibercept+folfiri                  | placebo+folfiri                                                     | 27.6  | 18.7 | 54    | 48.4  | 19.8 | 11.1 | 2013 | 30576  | 27591  |
| Xtandi    | enzalutamide          | metastatic castration resistant prostate cancer                                                                                                       | enzalutamide (mdv3100)               | placebo                                                             | 33.2  | 11.6 | 74.4  | 54.4  |      |      | 2013 | 49184  | 31960  |
| Imnovid   | pomalidomide          | relapsed and refractory multiple myeloma                                                                                                              | pom+ld-dex                           | hd-dex                                                              | 15.7  | 8    |       | 34    |      |      | 2013 | 127985 | 101646 |
| Lynparza* | olaparib              | platinum-sensitive relapsed BRCA-mutated (germline and/or somatic) high grade serous epithelial ovarian, fallopian tube, or primary peritoneal cancer | olaparib                             | placebo                                                             | 33.6  | 19.2 | 119.2 | 111.2 |      |      | 2014 | 70517  | 52142  |
| Cyramza   | ramucirumab           | advanced gastric cancer or gastro-oesophageal junction adenocarcinoma with disease progression                                                        | ramucirumab+ paclitaxel              | placebo+paclitaxel                                                  | 17.6  | 11.6 | 38.4  | 29.6  | 27.9 | 16.1 | 2014 | 87360  | 78842  |
| Mekinist  | trametinib            | unresectable or metastatic melanoma with a BRAF V600 mutation.                                                                                        | trametinib                           | chemotherapy (dtic or paclitaxel)                                   | 19.6  | 6    | 62.4  | 45.2  | 19   | 5    | 2014 | 62398  | 28157  |

|    |           |                          |                                                                                                                                                                |                                            |                                   |       |  |  |  |      |      |      |      |      |      |       |                |
|----|-----------|--------------------------|----------------------------------------------------------------------------------------------------------------------------------------------------------------|--------------------------------------------|-----------------------------------|-------|--|--|--|------|------|------|------|------|------|-------|----------------|
| 1  | Imbruvica | ibrutinib                | chronic lymphocytic leukaemia (CLL)                                                                                                                            | ibrutinib                                  | chlorambucil                      |       |  |  |  | 75.6 |      |      | 82.4 | 35.3 |      | 73805 | 51663          |
| 2  | Zydelig   | idelalisib               | chronic lymphocytic leukaemia (CLL)                                                                                                                            | idelalisib + rituximab                     | placebo + rituximab               |       |  |  |  | 22   |      |      | 74.5 | 14.5 | 2014 | 48667 | 34067          |
| 3  | Sylvant   | siltuximab               | multicentric Castlemans disease                                                                                                                                | siltuximab + best supportive care          | placebo + best supportive care    |       |  |  |  |      |      |      | 37.7 | 3.8  | 2014 | 66104 | 29829          |
| 4  | Keytruda  | pembrolizumab            | advanced(unresectable or metastatic) melanoma                                                                                                                  | ipilimumab                                 | pembrolizumab                     | 22    |  |  |  | 11.2 |      |      | 33.7 | 11.9 | 2015 | 90400 | 81586          |
| 5  | Opdivo    | nivolumab                | advanced (unresectable or metastatic) melanoma                                                                                                                 | nivolumab 3 mg/kg                          | dacarbazine                       | 18.8  |  |  |  | 16.8 |      |      | 31.7 | 10.6 | 2015 | 81310 | 71181          |
| 6  | Opdivo    | nivolumab                | locally advanced or metastatic non-small cell lung cancer (NSCLC)                                                                                              | nivolumab 3 mg/kg                          | docetaxel 75 mg/m2                | 9.32  |  |  |  | 16.8 | 48.8 | 37.4 | 19.2 | 12.4 |      | 81310 | 71181          |
| 7  | Opdivo    | nivolumab                | advanced renal cell carcinoma                                                                                                                                  | nivolumab 3 mg/kg                          | everolimus100mg                   | 18.4  |  |  |  | 17.8 | 100  | 78.2 | 25.1 | 5.4  |      | 81310 | in negotiation |
| 8  | Lenvima   | lenvatinib mesylate      | progressive, locally advanced or metastatic, differentiated (papillary/follicular/Hrthle cell) thyroid carcinoma (DTC), refractory to radioactive iodine (RAI) | lenvatinib                                 | placebo                           | 73.2  |  |  |  | 14.4 |      |      | 64.8 | 1.5  | 2015 | 68433 | 58673          |
| 9  | Cotellic  | cobimetinib hemifumarate | unresectable or metastatic melanoma with a BRAF V600 mutation                                                                                                  | cobimetinib+vemurafenib                    | placebo+vemurafenib               | 45.2  |  |  |  | 24   |      |      | 67.8 | 44.8 | 2015 | 75374 | 54420          |
| 10 | Kyprolis  | carfilzomib              | multiple myeloma who have received at least one prior therapy.                                                                                                 | carfilzomib + lenalidomide + dexamethasone | lenalidomide + dexamethasone (rd) | 105.2 |  |  |  | 70.4 |      |      | 87.1 | 67.7 | 2015 | 75900 | 44525          |

Progression Free Survival (PFS); Overall Survival (OS); Treatment Group (TRT); Control Group (CTR); Objective Response Rate (ORR); Official Negotiated Prices (Official Negot.); Discounted Prices (Disc. Prices).

\*: During the evaluation at the EMA, lymparza was found to be more effective in a subgroup of patients with a specific biomarker with the following outcome results: PFS lymparza: 44,8 w; PFS control: 17,2 w; OS lymparza: 139,6 w; OS control: 127,6.

1  
2  
3  
4  
5  
6  
7  
8  
9  
10  
11  
12  
13  
14  
15  
16  
17  
18  
19  
20  
21  
22  
23  
24  
25  
26  
27  
28  
29  
30  
31  
32  
33  
34  
35  
36  
37  
38  
39  
40  
41  
42  
43  
44  
45  
46

For peer review only



## Figure, tables, titles and legends

### Figure 1. Correlation between anticancer drug prices (officially negotiated) and health benefits

*Figure 1a. Official negotiated price (ex-factory) vs difference in median OS (16 drugs are included in the analysis: 15 with a single indication and one with two indications)*

*Figure 1b. Official negotiated price (ex-factory) vs difference in median PFS (25 drugs are included in the analysis: 22 with a single indication, two with two indications and one with three indication)*

*Figure 1c. Official negotiated price (ex-factory) vs proportion of ORR (24 drugs are included in the analysis: 20 with a single indication, three with two indications and one with three indications)*

Legend: Progression Free Survival (PFS); Overall Survival (OS); Objective Response Rate (ORR);

### Figure 2. Correlation between anticancer drug prices (discounted) and health benefits

*Figure 2a. Discounted price with additional compulsory rebates vs difference in median OS (16 drugs related to a single indication are included in the analysis)*

*Figure 2b. Discounted price with additional compulsory rebates vs difference in median PFS (25 drugs are included in the analysis: 22 with a single indication and three with two indications)*

*Figure 2c. Discounted price with additional compulsory rebates vs proportion of ORR (24 drugs are included in the analysis: 20 with a single indication and four with two indications)*

Legend: Progression Free Survival (PFS); Overall Survival (OS); Objective Response Rate (ORR);

### Table 1. Characteristics of the 30 anticancer drugs included in the analysis.

Legend:

Progression Free Survival (PFS); Overall Survival (OS); Treatment Group (TRT); Control Group (CTR); Objective Response Rate (ORR); Official Negotiated Prices (Official Negot.); Discounted Prices (Disc. Prices).

\*: During the evaluation at the EMA, lymparza was found to be more effective in a subgroup of patients with a specific biomarker with the following outcome results: PFS lymparza: 44,8 w; PFS control: 17,2 w; OS lymparza: 139,6 w; OS control: 127,6.

### Supplementary Table 1. Details of the statistical analysis conducted

### Supplementary Figures 1-4. Correlations in the sensitivity analysis conducted

*Supplementary Figure 1a. Official negotiated price (ex-factory) vs percentage improvement in median Overall Survival (OS) (16 drugs are included in the analysis: 15 with a single indication and one with two indications)*

*Supplementary Figure 1b. Official negotiated price (ex-factory) vs percentage improvement in median Progression Free Survival (PFS) (25 drugs are included in the analysis: 22 with a single indication, two with two indications and one with three indication)*

1  
2  
3 *Supplementary Figure 1c. Official negotiated price (ex-factory) vs percentage improvement in*  
4 *proportion of Objective Response Rate (ORR) (24 drugs are included in the analysis: 20 with a*  
5 *single indication, three with two indications and one with three indications)*  
6

7  
8 *Figure 2. Official negotiated price (ex-factory) vs median Progression Free Survival (PFS),*  
9 *excluding negative outcome data (25 drugs are included in the analysis: 22 with a single indication*  
10 *and three with two indications)*  
11

12 *Supplementary Figure 3a. Official negotiated price (ex-factory) vs median Overall Survival (OS),*  
13 *considering only data from placebo-controlled trials. (7 drugs related to a single indication are*  
14 *included in the analysis)*  
15

16 *Supplementary Figure 3b. Official negotiated price (ex-factory) vs median Progression Free*  
17 *Survival (PFS), considering only data from placebo-controlled trials. (11 drugs are included in the*  
18 *analysis: 10 with a single indication and one with 2 indications)*  
19

20  
21 *Supplementary Figure 4a. Official negotiated price (ex-factory) vs median Progression Free*  
22 *Survival (PFS), stratified by type of cancer (at least 2 indications for each cancer type). (24 drugs*  
23 *are included in the analysis: 21 with a single indication, two with two indications and one with three*  
24 *indication)*  
25

26 *Supplementary Figure 4b. Discounted price with additional compulsory rebates vs median*  
27 *Progression Free Survival (PFS), stratified by type of cancer (at least 2 indications for each cancer*  
28 *type). (24 drugs are included in the analysis: 21 with a single indication and three with 2*  
29 *indications)*  
30  
31

32 Legend: Progression Free Survival (PFS); Overall Survival (OS); Objective Response Rate (ORR);  
33  
34  
35  
36  
37  
38  
39  
40  
41  
42  
43  
44  
45  
46  
47  
48  
49  
50  
51  
52  
53  
54  
55  
56  
57  
58  
59  
60

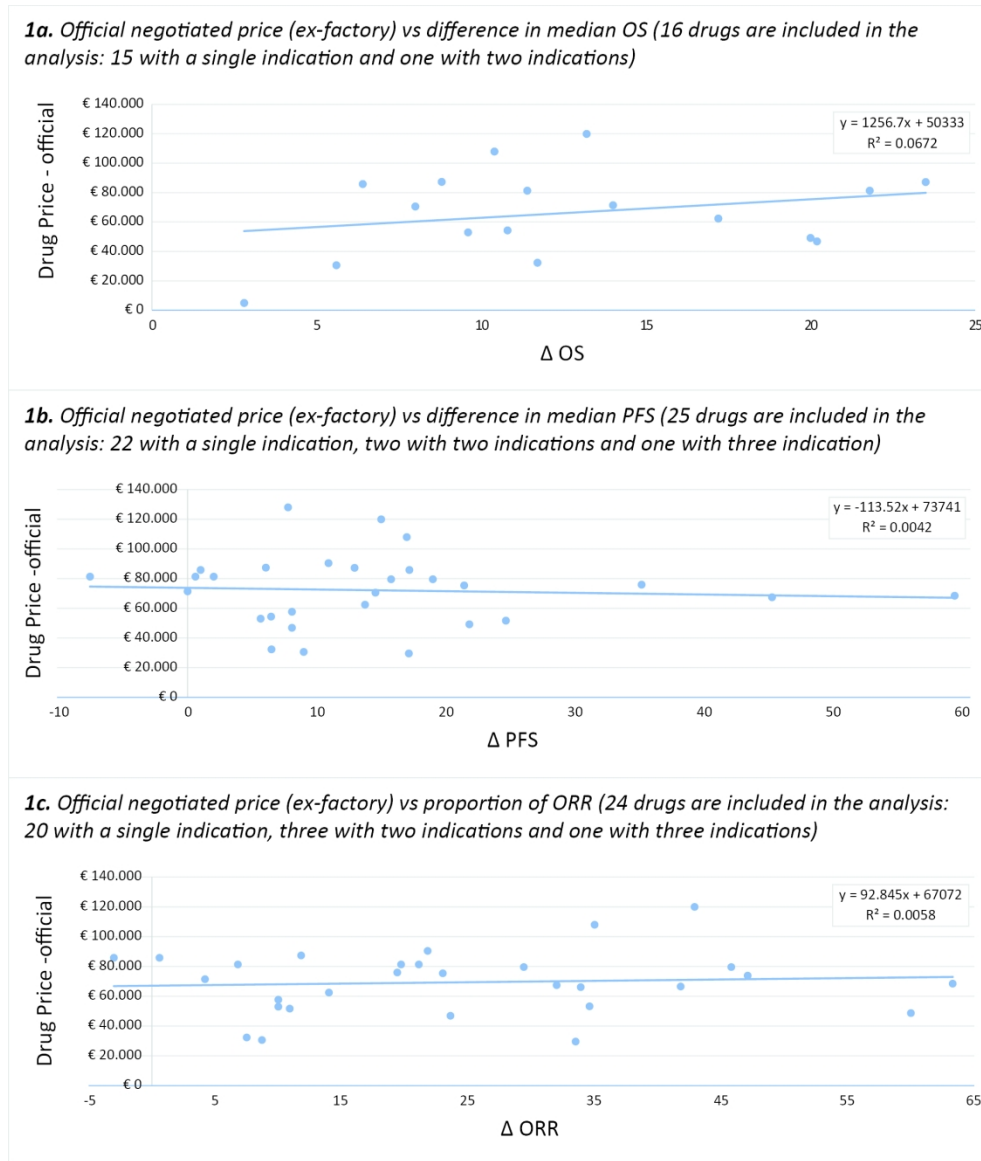

Progression Free Survival (PFS); Overall Survival (OS); Objective Response Rate (ORR)

Figure 1. Correlation between anticancer drug prices (officially negotiated) and health benefits

180x219mm (300 x 300 DPI)

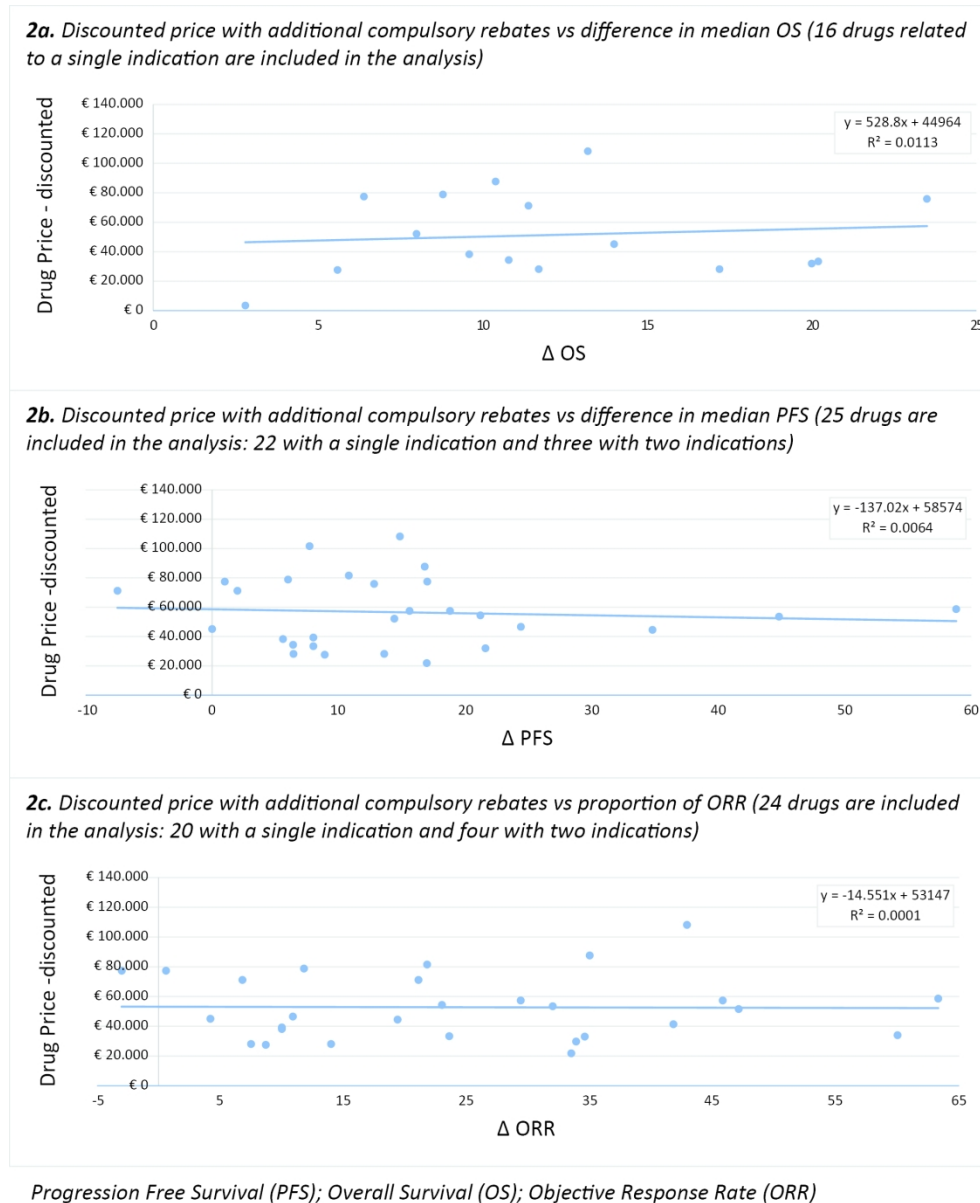

43  
44  
45 Figure 2. Correlation between anticancer drug prices (discounted) and health benefits

46  
47 180x219mm (300 x 300 DPI)

**Supplementary Table 1.** Details of the statistical analysis conducted

| Dependent variable        | Independent variable 1 | Independent variable 2 | Number of drugs involved in the analysis | Type of linear regression | Intercept | Coefficient of the Independent variable 1 | p value of the Independent variable 1 | Correlation coefficient: r | Coefficient of Determination: R <sup>2</sup> |
|---------------------------|------------------------|------------------------|------------------------------------------|---------------------------|-----------|-------------------------------------------|---------------------------------------|----------------------------|----------------------------------------------|
| Official negotiated price | Δ OS                   |                        | 17                                       | simple                    | 50332.71  | 1256.724                                  | 0.315                                 | 0.259                      | 0.067                                        |
| Discounted price          | Δ OS                   |                        | 16                                       | simple                    | 44963.88  | 528.800                                   | 0.695                                 | 0.11                       | 0.0113                                       |
| Official negotiated price | Δ OS                   | tumor type             | 17                                       | multiple                  | 57765.99  | 2065.264                                  | 0.433                                 |                            | 0.412                                        |
| Discounted price          | Δ OS                   | tumor type             | 16                                       | multiple                  | 55312.8   | 1391.947                                  | 0.614                                 |                            | 0.257                                        |
| Official negotiated price | % Δ OS                 |                        | 17                                       | simple                    | 56230.04  | 349.505                                   | 0.524                                 | 0.166                      | 0.027                                        |
| Discounted price          | % Δ OS                 |                        | 16                                       | simple                    | 50127.28  | 42.986                                    | 0.937                                 | 0.022                      | 0.0005                                       |
| Official negotiated price | % Δ OS                 | tumor type             | 17                                       | multiple                  | 72407.98  | 292.048                                   | 0.766                                 |                            | 0.362                                        |
| Discounted price          | % Δ OS                 | tumor type             | 16                                       | multiple                  | 68456.17  | 89.3936                                   | 0.930                                 |                            | 0.2286                                       |
| Official negotiated price | Δ PFS                  |                        | 29                                       | simple                    | 73741.11  | -113.515                                  | 0.738                                 | -0.065                     | 0.004                                        |
| Discounted price          | Δ PFS                  |                        | 28                                       | simple                    | 58574.12  | -137.018                                  | 0.687                                 | -0.080                     | 0.006                                        |
| Official negotiated price | Δ PFS                  | tumor type             | 29                                       | multiple                  | 70454.93  | -271.324                                  | 0.635                                 |                            | 0.338                                        |
| Discounted price          | Δ PFS                  | tumor type             | 28                                       | multiple                  | 56293.38  | -393.926                                  | 0.508                                 |                            | 0.283                                        |
| Official negotiated price | % Δ PFS                |                        | 29                                       | simple                    | 68763.32  | 33.7994                                   | 0.427                                 | 0.153                      | 0.024                                        |
| Discounted price          | % Δ PFS                |                        | 28                                       | simple                    | 52823.84  | 36.2925                                   | 0.392                                 | 0.169                      | 0.028                                        |
| Official negotiated price | % Δ PFS                | tumor type             | 29                                       | multiple                  | 66564.96  | 15.935                                    | 0.765                                 |                            | 0.333                                        |
| Discounted price          | % Δ PFS                | tumor type             | 28                                       | multiple                  | 51337.49  | 11.068                                    | 0.842                                 |                            | 0.266                                        |
| Official negotiated price | Δ ORR                  |                        | 29                                       | simple                    | 67072.16  | 92.845                                    | 0.696                                 | 0.076                      | 0.006                                        |
| Discounted price          | Δ ORR                  |                        | 28                                       | simple                    | 53147.09  | -14.550                                   | 0.953                                 | -0.010                     | 0.000                                        |
| Official negotiated price | Δ ORR                  | tumor type             | 29                                       | multiple                  | 62277.57  | 180.118                                   | 0.607                                 |                            | 0.448                                        |
| Discounted price          | Δ ORR                  | tumor type             | 28                                       | multiple                  | 42598.33  | 324.629                                   | 0.383                                 |                            | 0.450                                        |
| Official negotiated price | % Δ ORR                |                        | 27                                       | simple                    | 69838.7   | 0.563                                     | 0.918                                 | 0.020                      | 0.000                                        |
| Discounted price          | % Δ ORR                |                        | 26                                       | simple                    | 53627.54  | 0.965                                     | 0.864                                 | 0.036                      | 0.001                                        |
| Official negotiated price | % Δ ORR                | tumor type             | 27                                       | multiple                  | 67262.18  | 1.719                                     | 0.814                                 |                            | 0.436                                        |
| Discounted price          | % Δ ORR                | tumor type             | 26                                       | multiple                  | 51599.74  | 2.958                                     | 0.704                                 |                            | 0.405                                        |

Progression Free Survival (PFS); Overall Survival (OS); Objective Response Rate (ORR)

**1a. Official negotiated price (ex-factory) vs percentage improvement in median Overall Survival (OS)**  
(16 drugs are included in the analysis: 15 with a single indication and one with two indications)

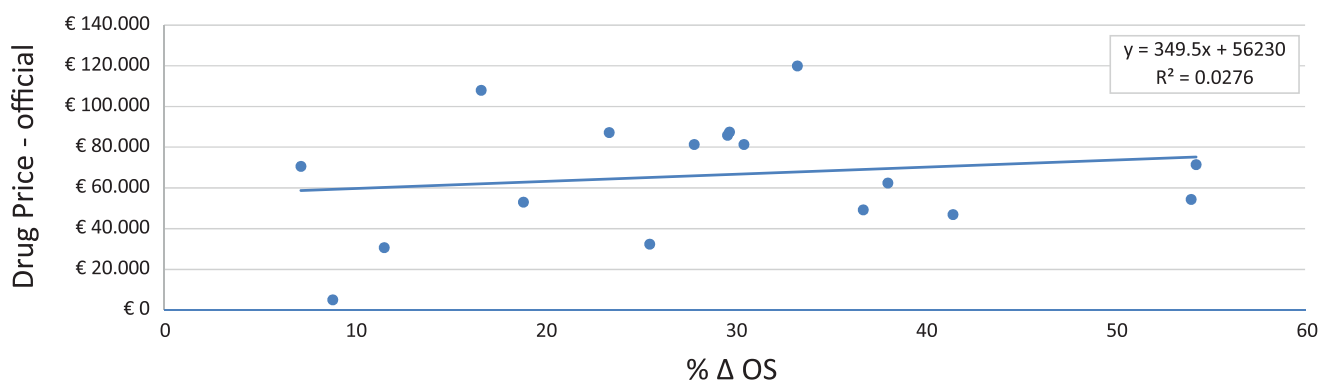

**1b. Official negotiated price (ex-factory) vs percentage improvement in median Progression Free Survival (PFS)**  
(25 drugs are included in the analysis: 22 with a single indication, two with two indications and one with three indication)

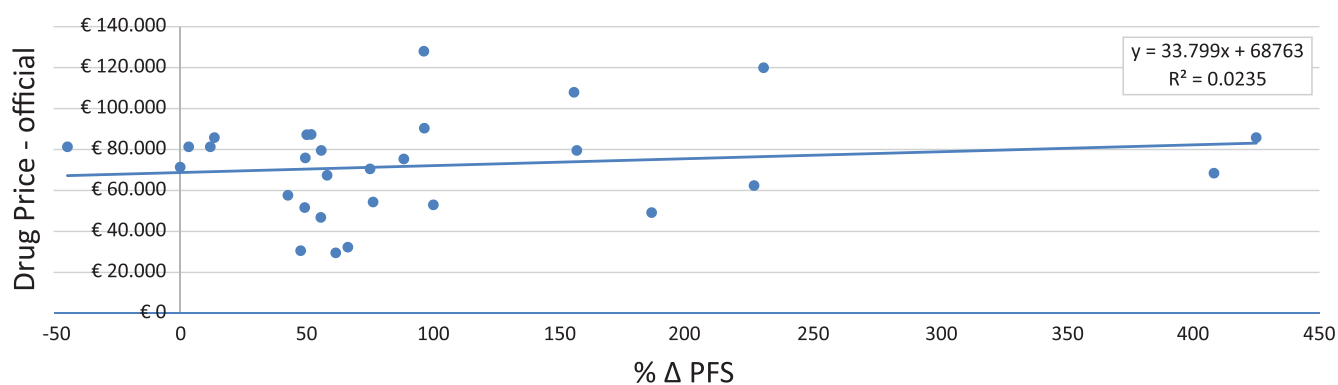

**1c. Official negotiated price (ex-factory) vs percentage improvement in proportion of Objective Response Rate (ORR)**  
(24 drugs are included in the analysis: 20 with a single indication, three with two indications and one with three indications)

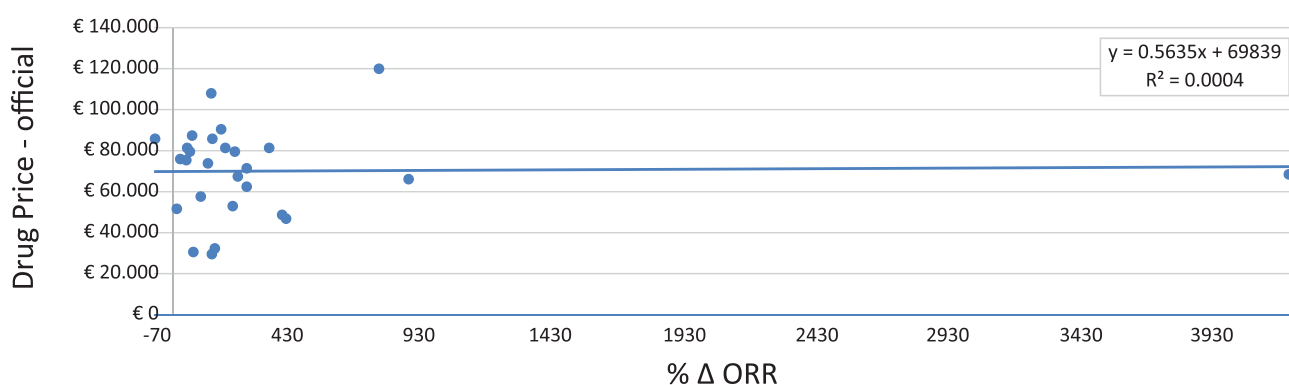

Progression Free Survival (PFS); Overall Survival (OS); Objective Response Rate (ORR)

2. Official negotiated price (ex-factory) vs median Progression Free Survival (PFS), excluding negative outcome data (25 drugs are included in the analysis: 22 with a single indication and three with two indications)

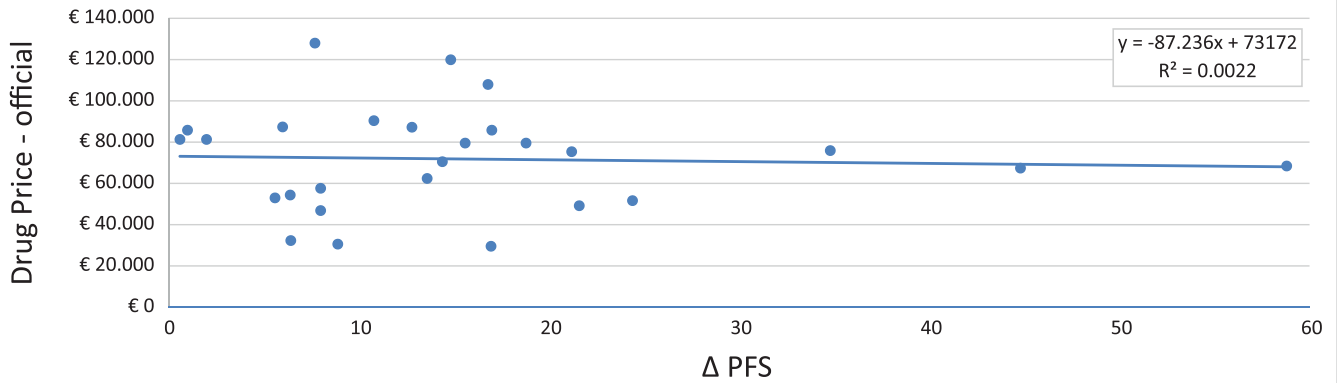

Progression Free Survival (PFS)

For peer review only

1  
2  
3  
4  
5  
6  
7  
8  
9  
10  
11  
12  
13  
14  
15  
16  
17  
18  
19  
20  
21  
22  
23  
24  
25  
26  
27  
28  
29  
30  
31  
32  
33  
34  
35  
36  
37  
38  
39  
40  
41  
42  
43  
44  
45  
46  
47  
48  
49  
50  
51  
52  
53  
54  
55  
56  
57  
58  
59  
60

**3a.** Official negotiated price (ex-factory) vs median Overall Survival (OS), considering only data from placebo-controlled trials. (7 drugs related to a single indication are included in the analysis)

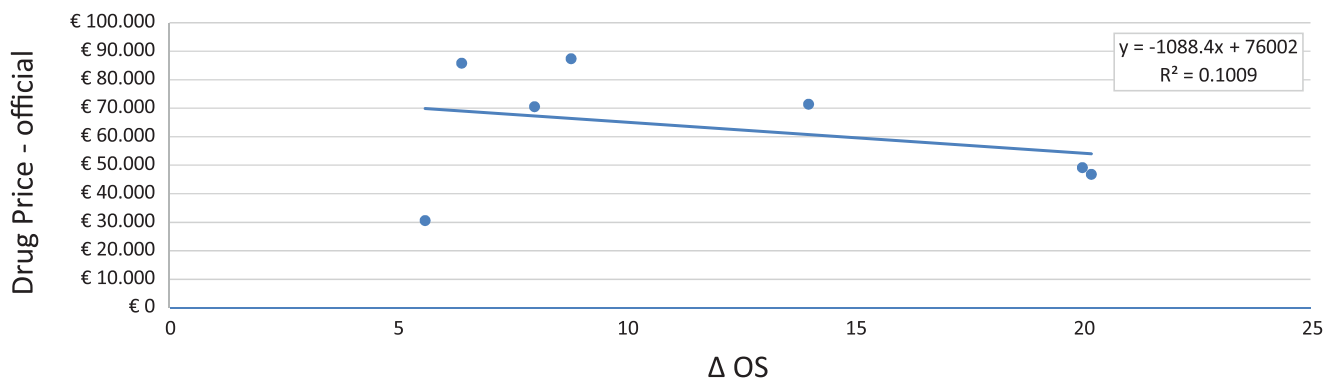

**3b.** Official negotiated price (ex-factory) vs median Progression Free Survival (PFS), considering only data from placebo-controlled trials. (11 drugs are included in the analysis: 10 with a single indication and one with 2 indications)

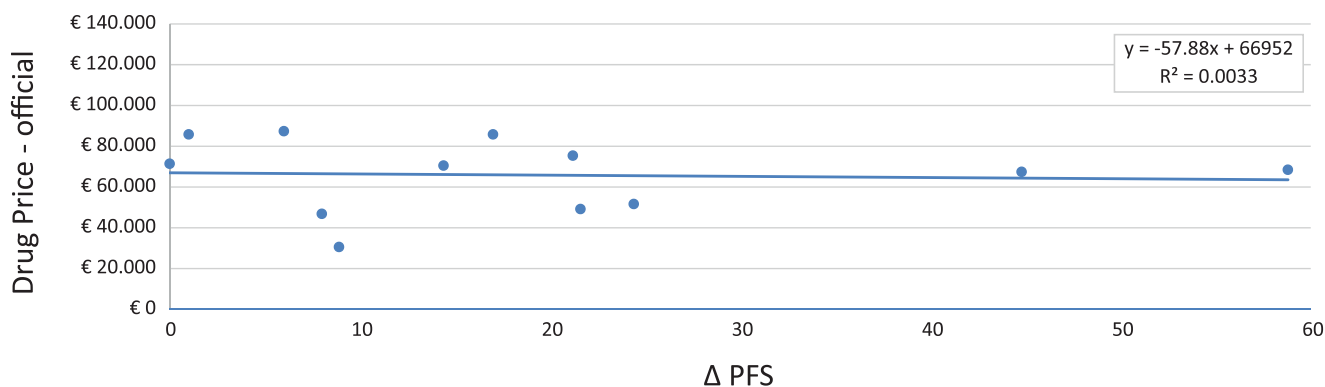

Progression Free Survival (PFS); Overall Survival (OS)



**4a.** Official negotiated price (ex-factory) vs median Progression Free Survival (PFS), stratified by type of cancer (at least 2 indications for each cancer type). (24 drugs are included in the analysis: 21 with a single indication, two with two indications and one with three indication)

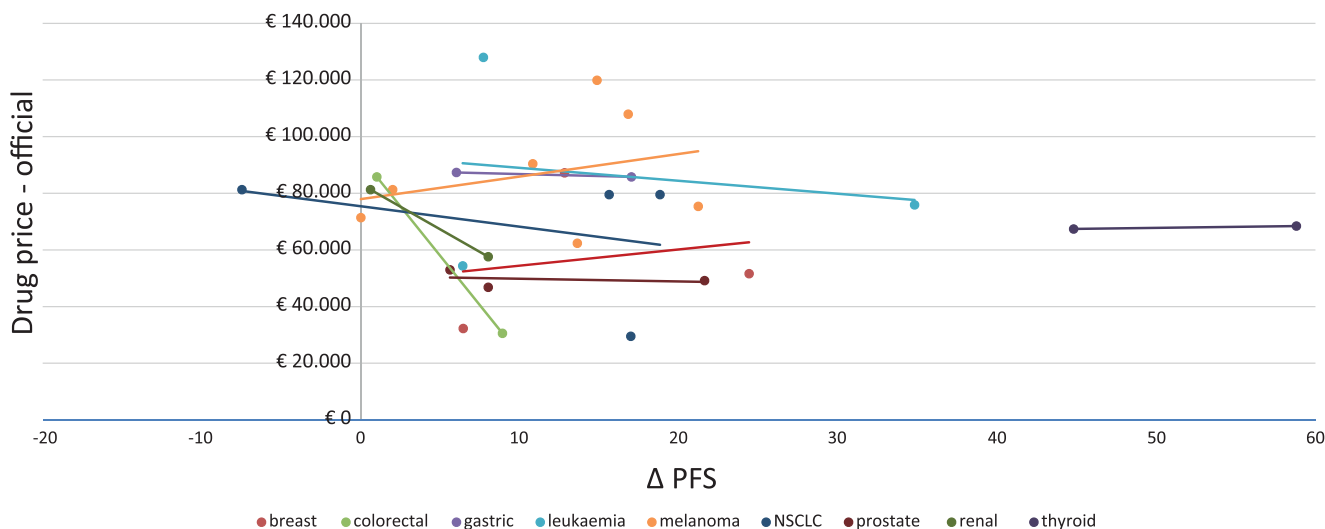

**4b.** Discounted price with additional compulsory rebates vs median Progression Free Survival (PFS), stratified by type of cancer (at least 2 indications for each cancer type). (24 drugs are included in the analysis: 21 with a single indication and three with 2 indications)

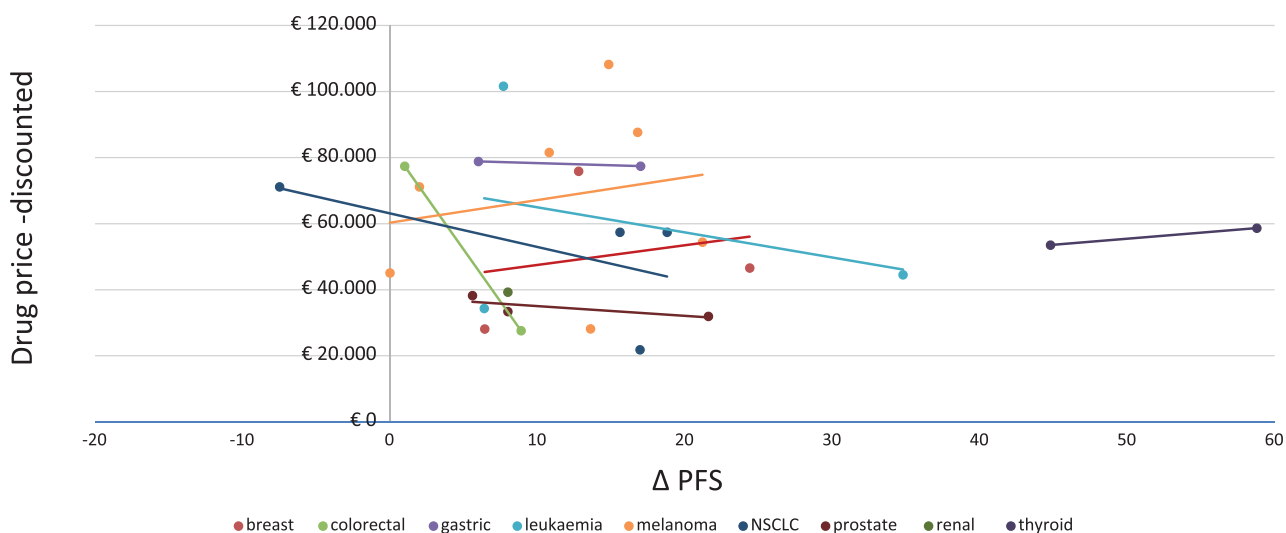

Progression Free Survival (PFS)

## STROBE (Strengthening The Reporting of OBServational Studies in Epidemiology) Checklist

A checklist of items that should be included in reports of observational studies. You must report the page number in your manuscript where you consider each of the items listed in this checklist. If you have not included this information, either revise your manuscript accordingly before submitting or note N/A.

**Note:** An Explanation and Elaboration article discusses each checklist item and gives methodological background and published examples of transparent reporting. The STROBE checklist is best used in conjunction with this article (freely available on the Web sites of PLoS Medicine at <http://www.plosmedicine.org/>, Annals of Internal Medicine at <http://www.annals.org/>, and Epidemiology at <http://www.epidem.com/>). Information on the STROBE Initiative is available at [www.strobe-statement.org](http://www.strobe-statement.org).

| Section and Item     | Item No. | Recommendation                                                                                                                                                                                                                                                                                                                                                                                                                                                                 | Reported on Page No. |
|----------------------|----------|--------------------------------------------------------------------------------------------------------------------------------------------------------------------------------------------------------------------------------------------------------------------------------------------------------------------------------------------------------------------------------------------------------------------------------------------------------------------------------|----------------------|
| Title and Abstract   | 1        | (a) Indicate the study's design with a commonly used term in the title or the abstract                                                                                                                                                                                                                                                                                                                                                                                         |                      |
|                      |          | (b) Provide in the abstract an informative and balanced summary of what was done and what was found                                                                                                                                                                                                                                                                                                                                                                            |                      |
| <b>Introduction</b>  |          |                                                                                                                                                                                                                                                                                                                                                                                                                                                                                |                      |
| Background/Rationale | 2        | Explain the scientific background and rationale for the investigation being reported                                                                                                                                                                                                                                                                                                                                                                                           |                      |
| Objectives           | 3        | State specific objectives, including any prespecified hypotheses                                                                                                                                                                                                                                                                                                                                                                                                               |                      |
| <b>Methods</b>       |          |                                                                                                                                                                                                                                                                                                                                                                                                                                                                                |                      |
| Study Design         | 4        | Present key elements of study design early in the paper                                                                                                                                                                                                                                                                                                                                                                                                                        |                      |
| Setting              | 5        | Describe the setting, locations, and relevant dates, including periods of recruitment, exposure, follow-up, and data collection                                                                                                                                                                                                                                                                                                                                                |                      |
| Participants         | 6        | (a) <i>Cohort study</i> —Give the eligibility criteria, and the sources and methods of selection of participants. Describe methods of follow-up<br><br><i>Case-control study</i> —Give the eligibility criteria, and the sources and methods of case ascertainment and control selection. Give the rationale for the choice of cases and controls<br><br><i>Cross-sectional study</i> —Give the eligibility criteria, and the sources and methods of selection of participants |                      |
|                      |          | (b) <i>Cohort study</i> —For matched studies, give matching criteria and number of exposed and unexposed<br><br><i>Case-control study</i> —For matched studies, give matching criteria and the number of controls per case                                                                                                                                                                                                                                                     |                      |
| Variables            | 7        | Clearly define all outcomes, exposures, predictors, potential confounders, and effect modifiers. Give diagnostic criteria, if applicable                                                                                                                                                                                                                                                                                                                                       |                      |

| Section and Item             | Item No. | Recommendation                                                                                                                                                                                                                                                                                                    | Reported on Page No. |
|------------------------------|----------|-------------------------------------------------------------------------------------------------------------------------------------------------------------------------------------------------------------------------------------------------------------------------------------------------------------------|----------------------|
| Data Sources/<br>Measurement | 8*       | For each variable of interest, give sources of data and details of methods of assessment (measurement). Describe comparability of assessment methods if there is more than one group                                                                                                                              |                      |
| Bias                         | 9        | Describe any efforts to address potential sources of bias                                                                                                                                                                                                                                                         |                      |
| Study Size                   | 10       | Explain how the study size was arrived at                                                                                                                                                                                                                                                                         |                      |
| Quantitative Variables       | 11       | Explain how quantitative variables were handled in the analyses. If applicable, describe which groupings were chosen and why                                                                                                                                                                                      |                      |
| Statistical Methods          | 12       | (a) Describe all statistical methods, including those used to control for confounding                                                                                                                                                                                                                             |                      |
|                              |          | (b) Describe any methods used to examine subgroups and interactions                                                                                                                                                                                                                                               |                      |
|                              |          | (c) Explain how missing data were addressed                                                                                                                                                                                                                                                                       |                      |
|                              |          | (d) <i>Cohort study</i> —If applicable, explain how loss to follow-up was addressed<br><br><i>Case-control study</i> —If applicable, explain how matching of cases and controls was addressed<br><br><i>Cross-sectional study</i> —If applicable, describe analytical methods taking account of sampling strategy |                      |
|                              |          | (e) Describe any sensitivity analyses                                                                                                                                                                                                                                                                             |                      |
| <b>Results</b>               |          |                                                                                                                                                                                                                                                                                                                   |                      |
| Participants                 | 13*      | (a) Report numbers of individuals at each stage of study—eg numbers potentially eligible, examined for eligibility, confirmed eligible, included in the study, completing follow-up, and analysed                                                                                                                 |                      |
|                              |          | (b) Give reasons for non-participation at each stage                                                                                                                                                                                                                                                              |                      |
|                              |          | (c) Consider use of a flow diagram                                                                                                                                                                                                                                                                                |                      |
| Descriptive Data             | 14*      | (a) Give characteristics of study participants (eg demographic, clinical, social) and information on exposures and potential confounders                                                                                                                                                                          |                      |
|                              |          | (b) Indicate number of participants with missing data for each variable of interest                                                                                                                                                                                                                               |                      |
|                              |          | (c) <i>Cohort study</i> —Summarise follow-up time (eg, average and total amount)                                                                                                                                                                                                                                  |                      |
| Outcome Data                 | 15*      | <i>Cohort study</i> —Report numbers of outcome events or summary measures over time                                                                                                                                                                                                                               |                      |
|                              |          | <i>Case-control study</i> —Report numbers in each exposure category, or summary measures of exposure                                                                                                                                                                                                              |                      |
|                              |          | <i>Cross-sectional study</i> —Report numbers of outcome events or summary measures                                                                                                                                                                                                                                |                      |

| Section and Item         | Item No. | Recommendation                                                                                                                                                                                               | Reported on Page No. |
|--------------------------|----------|--------------------------------------------------------------------------------------------------------------------------------------------------------------------------------------------------------------|----------------------|
| Main Results             | 16       | (a) Give unadjusted estimates and, if applicable, confounder-adjusted estimates and their precision (eg, 95% confidence interval). Make clear which confounders were adjusted for and why they were included |                      |
|                          |          | (b) Report category boundaries when continuous variables were categorized                                                                                                                                    |                      |
|                          |          | (c) If relevant, consider translating estimates of relative risk into absolute risk for a meaningful time period                                                                                             |                      |
| Other Analyses           | 17       | Report other analyses done—eg analyses of subgroups and interactions, and sensitivity analyses                                                                                                               |                      |
| <b>Discussion</b>        |          |                                                                                                                                                                                                              |                      |
| Key Results              | 18       | Summarise key results with reference to study objectives                                                                                                                                                     |                      |
| Limitations              | 19       | Discuss limitations of the study, taking into account sources of potential bias or imprecision. Discuss both direction and magnitude of any potential bias                                                   |                      |
| Interpretation           | 20       | Give a cautious overall interpretation of results considering objectives, limitations, multiplicity of analyses, results from similar studies, and other relevant evidence                                   |                      |
| Generalisability         | 21       | Discuss the generalisability (external validity) of the study results                                                                                                                                        |                      |
| <b>Other Information</b> |          |                                                                                                                                                                                                              |                      |
| Funding                  | 22       | Give the source of funding and the role of the funders for the present study and, if applicable, for the original study on which the present article is based                                                |                      |

\*Give information separately for cases and controls in case-control studies and, if applicable, for exposed and unexposed groups in cohort and cross-sectional studies.

**Once you have completed this checklist, please save a copy and upload it as part of your submission. DO NOT include this checklist as part of the main manuscript document. It must be uploaded as a separate file.**

# BMJ Open

## Clinical outcomes do not correlate with anticancer drug prices: a cross-sectional study in Italy

|                                 |                                                                                                                                                                                                                                                                                                                                                                                                                                                                                                                                                                                                                                                                                                                                                                                                                                          |
|---------------------------------|------------------------------------------------------------------------------------------------------------------------------------------------------------------------------------------------------------------------------------------------------------------------------------------------------------------------------------------------------------------------------------------------------------------------------------------------------------------------------------------------------------------------------------------------------------------------------------------------------------------------------------------------------------------------------------------------------------------------------------------------------------------------------------------------------------------------------------------|
| Journal:                        | <i>BMJ Open</i>                                                                                                                                                                                                                                                                                                                                                                                                                                                                                                                                                                                                                                                                                                                                                                                                                          |
| Manuscript ID                   | bmjopen-2019-033728.R2                                                                                                                                                                                                                                                                                                                                                                                                                                                                                                                                                                                                                                                                                                                                                                                                                   |
| Article Type:                   | Original research                                                                                                                                                                                                                                                                                                                                                                                                                                                                                                                                                                                                                                                                                                                                                                                                                        |
| Date Submitted by the Author:   | 28-Oct-2019                                                                                                                                                                                                                                                                                                                                                                                                                                                                                                                                                                                                                                                                                                                                                                                                                              |
| Complete List of Authors:       | Trotta, Francesco; Department of Epidemiology of the Regional Health Service Lazio,<br>Mayer, Flavia; Istituto Superiore di Sanita<br>Barone-Adesi, Francesco; Universita degli Studi del Piemonte Orientale<br>Amedeo Avogadro,<br>Esposito, Immacolata; Research and Health Foundation<br>Punreddy, Ranadhir; Universita degli Studi del Piemonte Orientale<br>Amedeo Avogadro<br>Da Cas, Roberto; Italian National Institute of Health, National Centre for Epidemiology<br>Traversa, Giuseppe; Italian National Institute of Health, National Centre for Epidemiology<br>Perrone, Francesco; Istituto Nazionale Tumori IRCCS Fondazione Pascale<br>Martini, Nello; Research and Health Foundation,<br>Gyawali, Bishal ; Harvard Medical School<br>Addis, Antonio; Department of Epidemiology of the Regional Health Service Lazio, ; |
| <b>Primary Subject Heading</b>: | Oncology                                                                                                                                                                                                                                                                                                                                                                                                                                                                                                                                                                                                                                                                                                                                                                                                                                 |
| Secondary Subject Heading:      | Health economics, Health policy                                                                                                                                                                                                                                                                                                                                                                                                                                                                                                                                                                                                                                                                                                                                                                                                          |
| Keywords:                       | Drug Costs, Antineoplastic Agents/therapeutic use, Treatment Outcome, Antineoplastic Agents                                                                                                                                                                                                                                                                                                                                                                                                                                                                                                                                                                                                                                                                                                                                              |
|                                 |                                                                                                                                                                                                                                                                                                                                                                                                                                                                                                                                                                                                                                                                                                                                                                                                                                          |

SCHOLARONE™  
Manuscripts

1  
2  
3 **Article type:** Original article  
4  
5

6 **Title:** Clinical outcomes do not correlate with anticancer drug prices: a cross-sectional study in  
7  
8 Italy  
9

10  
11 **Authors:** Francesco Trotta<sup>1</sup>, Flavia Mayer<sup>2</sup>, Francesco Barone-Adesi<sup>3</sup>, Immacolata Esposito<sup>4</sup>,  
12 Ranadhir Punreddy<sup>3</sup>, Roberto Da Cas<sup>2</sup>, Giuseppe Traversa<sup>2</sup>, Francesco Perrone<sup>5</sup>, Nello Martini<sup>4</sup>,  
13 Bishal Gyawali<sup>6,7</sup>, Antonio Addis<sup>1</sup>.  
14  
15

16  
17 **Affiliation:**  
18

- 19 1. Department of Epidemiology, Lazio Regional Health Service, Rome, Italy
- 20 2. Italian National Institute of Health, Rome, Italy
- 21 3. University of Eastern Piedmont, Novara, Italy
- 22 4. Research and Health Foundation, Rome, Italy
- 23 5. National Cancer Institute, G. Pascale Foundation - IRCCS, Naples, Italy
- 24 6. Program on Regulation, Therapeutics and Law, Department of Medicine, Brigham and  
25 Women's Hospital and Harvard Medical School, Boston, Massachusetts, USA.
- 26 7. Department of Oncology, and Division of Cancer Care and Epidemiology, Queen's  
27 University, Kingston, Canada  
28  
29

30  
31 **Corresponding Author:**

32 Antonio Addis  
33 Department of Epidemiology  
34 Lazio Regional Health Service, Rome, Italy Via Cristoforo Colombo 112/Pal.A  
35 00143 Roma/ Rome Italy  
36 Tel: +39 06.99722-139  
37 Fax: +39 06.99722111  
38 ORCID [0000-0003-0962-9959](https://orcid.org/0000-0003-0962-9959)  
39 [agmaddis@gmail.com](mailto:agmaddis@gmail.com)  
40  
41

42 *This research received no specific grant from any funding agency in the public, commercial or not-*  
43 *for-profit sectors*  
44

45  
46 **contributorship statement**  
47

48 FT, NM and AA conceptualized the study; FT, AA, NM, FM, FBA, GT, and RDC designed the study;  
49 FBA, RP, IE and NM were in charge of data extraction and quality control; FM, RDC, and FT  
50 performed the data analysis; FT, RDC, FM, GT, BG, FP and AA drafted the manuscript; all the  
51 authors contributed to the discussion and the interpretation of results, and reviewed the final version  
52 of the manuscript. All authors approved the final manuscript as submitted.  
53  
54

55 The authors have no conflicts of interest relevant to this article to disclose and all authors work for  
56 public Universities, Public Institutions or non-profit organizations  
57  
58

1  
2  
3 **Running head.** Anticancer drug prices and clinical outcomes in Italy  
4

5 **Word Count:** 2950  
6  
7

8 **Abstract:**  
9

10  
11 **Objective** To investigate whether the prices of new anticancer drugs correlated with their relative  
12 benefit despite negotiation.  
13  
14

15  
16 **Design** Retrospective cross-sectional study correlating new anticancer drugs prices with clinical  
17 outcomes.  
18  
19

20  
21  
22 **Setting** We did a retrospective cross-sectional study including all new anticancer drugs approved by  
23 the European Medicines Agency (2010-2016) and reimbursed in Italy.  
24  
25

26  
27 **Main Outcome(s) and Measure(s)** Information on clinical outcomes - in terms of median Overall  
28 Survival (OS), median Progression Free Survival (PFS) and Objective Response Rate (ORR) - was  
29 extracted from pivotal trials as reported in the European Public Assessment Reports available on the  
30 EMA website. Cost of a full course treatment was estimated on negotiated official and discounted  
31 prices. Regression coefficients  $\beta$ , their levels of significance  $p$  and the coefficients of determination  
32  $R^2$  were estimated adjusting by tumour type.  
33  
34  
35  
36  
37  
38  
39  
40  
41

42 **Results** Overall, 30 new anticancer drugs (with 35 indications) were available for analysis. Where  
43 data on Overall Survival were available we observed no correlation between the improvement in  
44 median OS (in weeks) and negotiated price ( $R^2= 0.067$ ,  $n = 16$  drugs for 17 indications). When the  
45 clinical outcomes were expressed as improvements in median PFS or ORR, 25 drugs (29 indications)  
46 were available for analysis, and again, there was no correlation with prices ( $R^2= 0.004$  and  $0.006$ ,  
47 respectively).  
48  
49  
50  
51  
52  
53  
54  
55  
56  
57  
58  
59  
60

1  
2  
3 **Conclusions and Relevance:** Our results suggest that the prices of anticancer drugs in Italy do not  
4 reflect their therapeutic benefit. Drug price negotiations, which is mandatory by law in Italy, do not  
5 seem to ensure that prices correlate with clinical benefits provided by cancer drugs. These results call  
6 for further efforts to establish the standard determinants of drug prices available at the time of  
7 negotiation. These findings need to be confirmed in other countries where price negotiations are in  
8 place. Moreover, further investigations may verify whether outcome data obtained after drug  
9 marketing would improve the correlation between prices and therapeutic benefit.  
10  
11  
12  
13  
14  
15  
16  
17  
18  
19

20 **Strengths and limitations of this study,**

- 21  
22  
23 • This study is the first attempt to evaluate whether there were better correlations between  
24 cancer drug prices and clinical outcomes in a setting where central price negotiations are  
25 mandatory for every new medicine.  
26  
27  
28  
29  
30  
31 • This understanding is important for cancer policy decisions.  
32  
33  
34 • In our analysis, the relationship between the clinical outcome and cost of anticancer drugs  
35 was ascertained by a simple linear regression model.  
36  
37  
38  
39  
40 • Clinical outcome, which was the dependent variable, was expressed as absolute or percent  
41 differences in outcomes between treatment and control groups.  
42  
43  
44  
45 • The main limitations of our study concern data completeness on clinical outcome and price.  
46  
47 We used, as an estimate of benefit, data from pivotal trials retrieved from EPARs.  
48  
49  
50  
51  
52  
53  
54  
55  
56  
57  
58  
59  
60



## Background

High costs of cancer drugs and resulting financial toxicity to cancer patients are now a well-recognized problem in cancer policy throughout the world [1-8]. Various solutions are being proposed to address this problem, of which price negotiations with pharmaceutical companies is proposed as an important strategy especially in the USA [9-11]. Because the Medicare is not allowed to negotiate prices with companies, despite being mandated to cover for every U.S. Food and Drug Administration (FDA) approved drug, various experts have argued that this is the reason for high drug prices in the USA. Indeed, cancer drug prices far exceed the costs of their development [12]; such negotiations might help to lower the prices of cancer drugs as evidenced by lower cost of cancer drugs in other developed countries compared with the USA.

However, little is known about if such negotiations would lead to better correlation between cancer drug prices and the benefits they provide. Studies have shown that drug prices do not correlate with clinical benefits for cancer drugs approved by the FDA, even though such studies have not taken central price negotiations into account [13,14]. Countries such as the United Kingdom and Italy negotiate prices and hence, the correlations might be different.

In Italy, drug price negotiation based on cost-effectiveness evaluation has been mandatory since 2001 for all medicines reimbursed by the National Health Service (NHS) [15,16]. We analysed the correlation between the prices of cancer drugs in Italy with their clinical outcomes to test the hypothesis that central price negotiations leads to better alignment of prices and benefits.

## Methods:

### *Identification of the study sample*

All new drugs approved by the EMA via a centralized procedure between January 2010 and June 2016 for the treatment of either solid or haematologic cancers were initially identified. Generics, biosimilars, interferons and granulocyte-colony stimulating factors (G-CSFs) were excluded. Only anticancer drugs with pivotal trials based on overall survival (OS), progression-free survival (PFS) or objective response rate (ORR) and with prices that were officially negotiated in Italy by 31<sup>st</sup> December 2016 were included in the cohort for analyses.

### *Data extraction*

Information on the clinical outcomes (in terms of median OS, median PFS, ORR) was extracted by two co-investigators (FBA and RP) from pivotal trials that compared new treatments with controls as reported in the European Public Assessment Reports - EPARs (summary table of the main study, Section 2.5.2) publicly available on the EMA website ([www.ema.europa.eu](http://www.ema.europa.eu)). Survival times were expressed in weeks, and the reported OS and PFS were transformed when necessary. Information on therapeutic indication and tumour type were also retrieved.

### *Drug prices*

The cost of a full course or 1-year treatment was estimated by two co-investigators (NM and IE) on the basis of the negotiated official ex-factory price (in euros) of drug packages, as published in the Official Gazette of the Italian Republic ([www.gazzettaufficiale.it](http://www.gazzettaufficiale.it)) and taking into account the posology as reported in the Summary of Product Characteristics (SPC). To compare prices of drugs with different schedules, in the text we refer to drug prices as the cost of a full course or a 1-year treatment. A further estimate took into account additional compulsory rebates [17] or extra-discounts

1  
2  
3 that were agreed with pharmaceutical companies; this information is confidential to the public but is  
4  
5 released to procurement stations within the Italian NHS (e.g., regions, hospitals, and local health  
6  
7 units).  
8  
9

### 10 *Statistical analysis*

11  
12  
13  
14 The following variables were extracted and analysed descriptively: year of approval, therapeutic  
15  
16 indication, type of treatment and control groups, outcome data, official and confidential costs per  
17  
18 treatment (1 year or a full course) and regulatory information (conditional/under exceptional  
19  
20 circumstances approval, or orphan drug status).  
21  
22

23  
24 The relationship between the clinical outcomes and cost of anticancer drugs was ascertained by a  
25  
26 simple linear regression model. Clinical outcome, which was the dependent variable, was expressed  
27  
28 as absolute or percent differences in outcomes between treatment and control groups. Regression  
29  
30 coefficients  $\beta$ , their levels of significance  $p$  and the coefficients of determination  $R^2$  were reported  
31  
32 for each model.  
33  
34

35  
36 We also performed several sensitivity analyses to test the robustness of the results. Specifically, we  
37  
38 performed multiple linear regression with tumour type as the independent variable to take into  
39  
40 account potential differences due to tumour characteristics. Moreover, we also repeated the analysis  
41  
42 after excluding negative outcome differences (in two cases, one of the outcomes was inferior in the  
43  
44 group receiving the new drug than in the comparison group) and actively controlled trials (considering  
45  
46 only placebo-controlled trials). Subgroup analysis by tumour type was also attempted as exploratory  
47  
48 analysis when a minimum number of two anticancer drugs within the same tumour type setting were  
49  
50 observed. Outlier cases were not excluded from the analyses, but their impact was evaluated and  
51  
52 reported when relevant as a separate analysis. All statistical analyses were performed using STATA  
53  
54 (Statacorp, version 14.0)  
55  
56  
57  
58  
59  
60

1  
2  
3  
4  
5  
6  
7  
8  
9  
10  
11  
12  
13  
14  
15  
16  
17  
18  
19  
20  
21  
22  
23  
24  
25  
26  
27  
28  
29  
30  
31  
32  
33  
34  
35  
36  
37  
38  
39  
40  
41  
42  
43  
44  
45  
46  
47  
48  
49  
50  
51  
52  
53  
54  
55  
56  
57  
58  
59  
60

*Patient and public involvement*

Patients have not been involved in the development of the research question or the design of this study. However, results of this analysis will be disseminated throughout public conferences, with statements summarizing our results, and with an open access to the published report posted in our institutional websites

For peer review only

## Results

From 2010 to mid-2016, 45 new anticancer drugs for 56 different oncology indications were approved via centralized procedures by the EMA. For 40 new anticancer drugs (47 indications), the basis for the approval was a pivotal trial adopting OS, PFS or ORR as a primary outcome; the price negotiation was completed by December 2016 for only 30 new anticancer drugs (35 indications) which are included in our analysis (Table 1). Seven drugs received orphan drug status by the EMA and two (vandetanib and crizotinib) received conditional approval. Of the 35 oncology indications tested in 35 different pivotal trials which were all controlled clinical trials, the commonest indications were melanoma (7 out of 35), followed by haematological cancer (6 out of 35) and non-small cell lung cancer (4 out of 35). In 15 such trials (43%), placebo was used as the control arm. Of the 35 indications, data on OS, PFS and ORR were available for 17, 29 and 29 indications respectively. Each drug-indication pair contributed to one or more of these analyses, depending on which outcomes were reported in the EPAR.

In the treatment groups, the median improvement in the OS and PFS were 11.4 weeks (IQR 8.8-17.2; min 13.2; max 23.5) and 12.8 weeks (IQR 6.4-17; min -7.48; max 58.8), respectively; median ORR improvement in the treatment group was 21.8% (IQR 10-34.6; min -3; max 63.3). The reported ranges have negative minimum values since in two cases - nivolumab for NSCLC and regorafenib for gastrointestinal stromal tumours - the experimental treatment had a negative effect on one of the outcomes compared to the control group (in terms of PFS for nivolumab and ORR for regorafenib). The median negotiated price for a 1-year treatment was 72,392 euros (IQR 53,819-85,800; min 4,942; max 142,785), which was further discounted by 25% (on average) after applying confidential rebates. For all anticancer drugs but ipilimumab the price was calculated as 1-year treatment since the posology reported in the Summary of Product Characteristics (SPC) reported that the treatment should

1  
2  
3 continue as long as clinical benefit is observed or until unacceptable toxicity occurs. In the case of  
4  
5 ipilimumab the price was calculated as a course of 4 doses as reported in the SPC.  
6  
7

8  
9 The official (ex-factory) price of new anticancer drugs and absolute clinical outcomes showed no  
10  
11 correlation (Figure 1a-c). The relationship between the improvement in median OS (in weeks) and  
12  
13 negotiated price was estimated for 16 drugs (17 indications), and no correlation was observed ( $R^2=$   
14  
15 0.067). When clinical outcomes were expressed as absolute advantage in median PFS or ORR, 25  
16  
17 drugs (29 indications) were available for analysis, and in these cases, no correlation was observed  
18  
19 ( $R^2= 0.004$  and  $0.006$ , respectively).  
20  
21  
22

23 Repeating the analyses and taking into account the additional confidential rebates, which are  
24  
25 compulsory for hospital procurement, no improvement in the benefit/price relationships was  
26  
27 highlighted (Figure 2a-c). These findings also remained unchanged when the analyses were repeated  
28  
29 with adjustments for tumour type (Supplementary Table 1) or when clinical outcome was expressed  
30  
31 as a percentage of improvement instead of as an absolute difference (Supplementary Figure 1a-c).  
32  
33 Sensitivity analyses that excluded negative improvements in outcomes over a control group  
34  
35 (Supplementary Figure 2) and considered only data from placebo controlled trials (Supplementary  
36  
37 Figure 3a,b) confirmed the main analysis. The exploratory subgroup analyses by tumour type did not  
38  
39 identify specific positive correlation patterns depending on tumour setting (Supplementary Figure 4  
40  
41  
42  
43  
44 a,b).  
45  
46  
47  
48  
49  
50  
51  
52  
53  
54  
55  
56  
57  
58  
59  
60

## Discussion

This study is the first attempt to evaluate whether there were better correlations between cancer drug prices and clinical outcomes in a setting where central price negotiations are mandatory for every new medicine. Our study gave unexpected results to the research question, highlighting no relationships between cost of cancer drugs and benefits. Moreover, all pre-specified sensitivity and subgroup analyses confirmed the main findings. This finding will have important policy implications both for countries like USA where price negotiations are absent and for other countries like Italy where price negotiations do exist.

In our study, the correlation between drug costs and clinical outcomes was even lower than the ones previously noted in the US context [13,14], showing that negotiations did not tilt the relationship between drug prices and benefit positively. Thus, higher drug pricing remains despite the Italian legislative environment, where approval based on cost-effectiveness analysis and price negotiations have been mandatory by law since 2001 [15,16]. This finding may cast doubts on the role of the negotiation itself. However, it is important to understand that countries like Italy that negotiate drug prices do such negotiations only for binary decisions of approval or no-approval, not taking into account, during negotiation, a clear correlation between prices and benefits. This understanding is important for cancer policy decisions.

Indeed, there is no legal policy in any country to negotiate prices differently for drugs approved on the basis of surrogate endpoints versus survival outcomes, or drugs that improve survival in days, versus those that improve survival in months or drugs with immature benefit risk profiles [18-22]. Although steps in the right direction, in lack of such policy, the value frameworks proposed by organizations such as ASCO, ESMO or NCCN have become little more than intellectual exercises [23-26].

1  
2  
3  
4  
5  
6 Another reason price negotiations did not achieve better price-value correlations is that because of  
7  
8 the global market of drugs, each single country - although large – only represents a small portion of  
9  
10 the consumer market. Thus, companies “wield the stick”, setting the maximum price that the market  
11  
12 will bear [27]. In addition, in Italy, no threshold for incremental cost-effectiveness ratio (ICER) has  
13  
14 been determined; thus, no limit is in place to be used as a decision rule in resource allocation at the  
15  
16 time of negotiation/reimbursement decisions. The lack of such kind of cut-off might have contributed  
17  
18 to the negative results in our study. However, we recognize that even when a threshold for ICER is  
19  
20 well established, such as in the UK [28], continuous exceptions have been allowed in the case of  
21  
22 anticancer drugs. For example, an ad hoc fund established in 2010 (i.e., the Cancer Drug Fund) was  
23  
24 recently dismissed by the Parliament because it did not deliver meaningful value to patients or society  
25  
26 [29].  
27  
28  
29  
30  
31

32 In the EU context (where newer anticancer drugs are approved by EMA without considering the  
33  
34 added-value or cost-effectiveness), the complexity further increases because once a marketing  
35  
36 authorization is granted, it may become difficult to manage the reimbursement issue at a national  
37  
38 level [30]. Moreover, it is also difficult for payers (NHS/insurance) to defend the thesis against the  
39  
40 public opinion that an anticancer drug cannot be reimbursed because it is too expensive [30, 31].  
41  
42 Indeed, as our study shows, the confidential discounts following negotiations between a member state  
43  
44 and a company do not ameliorate the correlation between treatment costs and benefits even though  
45  
46 they reduce absolute drug prices.  
47  
48  
49  
50

51 Another factor that negatively influences the contractual power of negotiation is non-transparent  
52  
53 information on drug prices across countries. Difficulties in retrieving full information on prices have  
54  
55 been already recognized in a recent survey comparing prices of anticancer drugs in 16 EU countries,  
56  
57  
58  
59  
60



1  
2  
3 Australia and New Zealand [32]. Vogler et al. found that price information is scarce and not disclosed  
4 due to confidential discounts or MEAs, calling for higher transparency. The authors state that it is in  
5 the interest of policy makers to remove clauses limiting disclosure on price information because they  
6 risk overpaying when setting prices through external price referencing. This concern might be  
7 relevant in the Italian context since the negotiation procedure for reimbursement takes into account  
8 the price in other EU countries as well as the price of similar products within the same  
9 pharmacotherapeutic group [33].

10  
11  
12 We believe that two partly independent approaches could be adopted by policy makers to achieve a  
13 better balance between cancer drug prices and benefits. First, price negotiations should be more  
14 strictly based on the level of evidence as well as the magnitudes of benefit. An ICER measure (such  
15 as QALY) should represent a threshold for reimbursement, thus setting a starting point for price  
16 negotiation and adjusting the ICER threshold based on the magnitude of the relative benefit reached.  
17 If the information on the relative value is not available at the time of approval, comparisons can be  
18 performed using indirect techniques, whereas after entering the market, payers should play a major  
19 role in supporting the evidence generating process.

20  
21  
22 The second approach that could attain lower prices would require an increased transparency on the  
23 costs of drug development process, including the relative contributions from academia and public  
24 sector to the development of a drug [34-38]. For instance, research conducted to evaluate efforts of  
25 drug development processes highlighted that about half of the most transformative drugs approved  
26 by the FDA had substantial contributions to their development by academic researchers supported by  
27 government funding [34,35]; in addition, it has been estimated that the cost of late clinical  
28 development takes a limited part of the whole process [36]. It is probably the right time to  
29 appropriately acknowledge the contributions of publicly funded research during drug price  
30 negotiation with companies. Often, comparative effectiveness research is funded by public

1  
2  
3 institutions to test different treatments in real practice on robust outcomes with longer follow up or  
4  
5 special populations [37,38]. The findings of these studies should be linked to a continuous price re-  
6  
7 negotiation over the life cycle of a product.  
8  
9

10 Other approaches identified as possible solutions to keep the health system sustainable address the  
11  
12 general governance of the system, i.e., when the price is already set. In fact, a price-volume approach  
13  
14 [39] or indication-based pricing [40,41] have been modelled, each presenting pros and cons.  
15  
16 Moreover, given that different oncology settings appear to be oligopolistic, thus refraining from price  
17  
18 competition, another possible solution comes from national/regional tenders among therapeutic  
19  
20 categories when more alternatives are available [42].  
21  
22  
23  
24

25 The main limitations of our study concern data completeness on clinical outcome and price. We used,  
26  
27 as an estimate of benefit, data from pivotal trials retrieved from EPARs. Moreover, we are not aware  
28  
29 if further (more robust) data became available at a later stage when the price was negotiated at the  
30  
31 national level. Thus, we cannot exclude that the correlation between drug prices and therapeutic  
32  
33 benefit might improve taking into account data acquired after the marketing of anticancer drugs.  
34  
35  
36  
37

38 Another important limitation is that we have not considered quality of life outcomes as another metric  
39  
40 of clinical benefit. Furthermore, a recent study has shown that quality of life outcomes are not  
41  
42 routinely collected or published, and that the tools used to measure quality of life are varied to have  
43  
44 a uniform metric for comparison [43]. Although we have included surrogate measures such as PFS  
45  
46 or ORR as clinical outcomes in our analysis because they were considered as the basis for approval  
47  
48 by the regulatory agency, these surrogate measures do not always correlate with true clinical benefits  
49  
50 in terms of improved survival or improved quality of life [43,44]. Regarding the price estimate, we  
51  
52 estimated the treatment costs for 1-year treatment or for the total course in the case of ipilimumab  
53  
54  
55  
56  
57  
58  
59  
60

1  
2  
3 where the treatment course lasts less than 1 year. However, the exclusion of ipilimumab would not  
4  
5 alter the main findings.  
6  
7

8 Another factor that might have impacted the price estimation is the rebate obtained at the  
9  
10 regional/local level following drug tenders. This information was not available for the analyses and  
11  
12 would have been not generalizable at the national level. Moreover, additional savings were expected  
13  
14 “a posteriori” from the Managed Entry Agreements in place in Italy (whose information is not  
15  
16 publicly available) and were not considered in the analyses.  
17  
18

19  
20 Our study is a retrospective cross-sectional correlation study that aimed at evaluating whether central  
21  
22 price negotiation (mandatory by law in Italy) leads to better alignment of prices and the benefits  
23  
24 known at the time of drug approval. This means that our analysis is not aimed at comparing costs and  
25  
26 outcomes within drug classes, as a typical cost effective study, and we never intended to assess the  
27  
28 added values of the approved drugs in the context of all other drugs sharing the same indication. The  
29  
30 “population”/cohort approach that we adopted has the intrinsic limitation of including drugs approved  
31  
32 for different indications or different cancer types (with various incidence/prevalence) based on  
33  
34 different clinical data packages. The consequent heterogeneity stemming from this approach was  
35  
36 resolved adjusting the correlation analyses by tumour type or conducting several sub-analyses.  
37  
38 Following this approach, we found results consistent with primary findings thus confirming the  
39  
40 robustness of methods and results.  
41  
42  
43  
44  
45

## 46 **Conclusion**

47  
48 Our results suggest that price negotiations for approval decisions alone may not bring balance  
49  
50 between prices and benefits of anticancer drugs. Based on the limited outcome data available at the  
51  
52 time of reimbursement decisions (OS; PFS; ORR), prices of anticancer drugs do not reflect their  
53  
54 therapeutic benefit. Other strategies, such as value based price negotiations, price negotiations strictly  
55  
56  
57  
58  
59

1  
2  
3 based on strength of evidence and price transparencies may be necessary to better achieve the drug  
4 prices and benefits balance. These results need to be confirmed in other countries where a national  
5 price negotiation exists.  
6  
7  
8  
9  
10  
11  
12  
13  
14  
15  
16  
17  
18  
19  
20  
21  
22  
23  
24  
25  
26  
27  
28  
29  
30  
31  
32  
33  
34  
35  
36  
37  
38  
39  
40  
41  
42  
43  
44  
45  
46  
47  
48  
49  
50  
51  
52  
53  
54  
55  
56  
57  
58  
59  
60

For peer review only

## Contributorship statement

FT, NM and AA conceptualized the study; FT, AA, NM, FM, FBA, GT, and RDC designed the study; FBA, RP, IE and NM were in charge of data extraction and quality control; FM, RDC, and FT performed the data analysis; FT, RDC, FM, GT, BG, FP and AA drafted the manuscript; all the authors contributed to the discussion and the interpretation of results, and reviewed the final version of the manuscript. All authors approved the final manuscript as submitted.

## Competing interests

The authors have no competing of interest relevant to this article to disclose and all authors works for public Universities, Public Institutions or not for profit Organizations.

## Funding

None.

## Data Availability

All data presented in the analysis have been extracted by public documents (EPARs for each drug outcomes and clinical data; regional and national administrative official documents (i.e. Gazzetta Ufficiale for prices). Data are available upon reasonable request

**References:**

- 1) Quintiles IMS Institute. Outlook for Global Medicines through 2021. December 2016. 1-54.  
[http://www.imshealth.com/en/thought-leadership/quintilesims-institute/reports/outlook\\_for\\_global\\_medicines\\_through\\_2021](http://www.imshealth.com/en/thought-leadership/quintilesims-institute/reports/outlook_for_global_medicines_through_2021)
- 2) Ghinea N, Lipworth W, Kerridge I. Propaganda or the cost of innovation? Challenging the high price of new drugs. *BMJ*. 2016; 352: i1284, doi: 10.1136/bmj.i1284.
- 3) European Commission - Press release. Antitrust: Commission opens formal investigation into Aspen Pharma's pricing practices for cancer medicines. Brussels, 15 May 2017.  
[http://europa.eu/rapid/press-release\\_IP-17-1323\\_en.htm](http://europa.eu/rapid/press-release_IP-17-1323_en.htm)
- 4) Gordon N, Stemmer SM, Greenberg D, et al. Trajectories of Injectable Cancer Drug Costs After Launch in the United States. *J Clin Oncol*. 2018; 36: 319-325.
- 5) Narang AK, Nicholas LH. Out-of-Pocket Spending and Financial Burden Among Medicare Beneficiaries With Cancer. *JAMA Oncol*. 2017; 3:757-765.
- 6) Shankaran V, Ramsey S. Addressing the Financial Burden of Cancer Treatment: From Copay to Can't Pay. *JAMA Oncol*. 2015; 1:273-4.
- 7) Liz Szabo. Cancer patients skipping medicines or delaying treatment due to high drug prices. *STAT* 15 March, 2017. <https://www.statnews.com/2017/03/15/cancer-patients-drug-prices/>
- 8) de Souza JA, Conti RM. Mitigating Financial Toxicity Among US Patients With Cancer. *JAMA Oncol*. 2017; 3: 765-766.
- 9) Kesselheim AS, Avorn J, Sarpatwari A. The High Cost of Prescription Drugs in the United States: Origins and Prospects for Reform. *JAMA*. 2016; 316: 858-71.
- 10) Hwang TJ, Kesselheim AS, Sarpatwari A. Value-Based Pricing and State Reform of Prescription Drug Costs. *JAMA*. 2017; 318: 609-610,

- 1  
2  
3 11) Fralick M, Avorn J, Kesselheim AS. The Price of Crossing the Border for Medications. N  
4 Engl J Med. 2017; 377: 311-313.  
5  
6  
7  
8 12) Tay-Teo K1, Ilbawi A, Hill SR. Comparison of Sales Income and Research and  
9 Development Costs for FDA-Approved Cancer Drugs Sold by Originator Drug Companies.  
10 JAMA Netw Open. 2(1):e186875, 2019. doi: 10.1001/jamanetworkopen.2018.6875.  
11  
12  
13  
14 13) Mailankody S, Prasad V. Five Years of Cancer Drug Approvals: Innovation, Efficacy, and  
15 Costs. JAMA Oncol. 2015; 1: 539-40, Erratum in: JAMA Oncol. 2015; 1: 544.  
16  
17  
18  
19 14) Vivot A, Jacot J, Zeitoun JD, et al. Clinical benefit, price and approval characteristics of  
20 FDA-approved new drugs for treating advanced solid cancer, 2000-2015. Ann Oncol. 2017;  
21 28:1111-1116.  
22  
23  
24  
25  
26 15) Comitato Interministeriale per la Programmazione Economica. Individuazione dei criteri per  
27 la contrattazione del prezzo dei farmaci (Deliberazione n.3/2001). Official Gazette of the  
28 Italian Republic. N. 73 del 28-03-2001.  
29  
30  
31  
32  
33 <http://www.gazzettaufficiale.it/eli/id/2001/03/28/001A3188/sg>  
34  
35  
36 16) Italian Parliament. Legge 24 novembre 2003, n. 326. Conversione in legge, con  
37 modificazioni, del decreto-legge 30 settembre 2003, n. 269, recante disposizioni urgenti per  
38 favorire lo sviluppo e per la correzione dell'andamento dei conti pubblici. Official Gazette of  
39 the Italian Republic. N. 274; 25 November 2003.  
40  
41  
42  
43  
44 <http://www.parlamento.it/parlam/leggi/03326l.htm>  
45  
46  
47 17) Italian Parliament . Legge 27 December 2006, n. 296. Art. 1 comma 796, lettera g).  
48 Disposizioni per la formazione del bilancio annuale e pluriennale dello Stato (finanziaria  
49 2007). Official Gazette of the Italian Republic. N. 299; 27 December 2006, Suppl ord. n.  
50 244.  
51  
52  
53  
54  
55  
56  
57  
58  
59  
60

- 1  
2  
3 18) Apolone G, Joppi R, Bertelè V, et al. Ten years of marketing approvals of anticancer drugs  
4  
5 in Europe: regulatory policy and guidance documents need to find a balance between  
6  
7 different pressures. *Br J Cancer*. 2005; 93: 504-9.  
8  
9
- 10 19) Bertele' V, Banzi R, Capasso F, et al. Haematological anticancer drugs in Europe: any added  
11  
12 value at the time of approval? *Eur J Clin Pharmacol*. 2007; 63: 713-9.  
13  
14
- 15 20) Trotta F, Apolone G, Garattini S, et al. Stopping a trial early in oncology: for patients or for  
16  
17 industry? *Ann Oncol*. 2008; 19: 1347-53. doi: 10.1093/annonc/mdn042. Epub 2008 Feb 27  
18  
19
- 20 21) Kim C, Prasad V. Cancer Drugs Approved on the Basis of a Surrogate End Point and  
21  
22 Subsequent Overall Survival: An Analysis of 5 Years of US Food and Drug Administration  
23  
24 Approvals. *JAMA Intern Med*. 2015; 175: 1992-4.  
25
- 26 22) Banzi R, Gerardi C, Bertele' V, et al. Approvals of drugs with uncertain benefit-risk profiles  
27  
28 in Europe. *Eur J Intern Med*. 2015; 26: 572-84.  
29
- 30 23) Salas-Vega S, Iliopoulos O, Mossialos E. Assessment of Overall Survival, Quality of Life,  
31  
32 and Safety Benefits Associated with New Cancer Medicines. *JAMA Oncol*. 2017; 3:382-  
33  
34 390.  
35  
36
- 37 24) Wise PH. Cancer drugs, survival, and ethics. *BMJ* 2016; 355: i5792  
38  
39 <https://doi.org/10.1136/bmj.i5792> (Published 09 November 2016)  
40  
41
- 42 25) Del Paggio JC, Sullivan R, Schrag D, et al. Delivery of meaningful cancer care: a  
43  
44 retrospective cohort study assessing cost and benefit with the ASCO and ESMO  
45  
46 frameworks. *Lancet Oncol*. 2017; 18: 887-894.  
47  
48
- 49 26) Sobrero A1, Bruzzi P. Incremental advance or seismic shift? The need to raise the bar of  
50  
51 efficacy for drug approval. *J Clin Oncol*. 2009; 27:5868-73.  
52  
53
- 54 27) Ramsey SD, Lyman GH, Bangs R. Addressing Skyrocketing Cancer Drug Prices Comes  
55  
56 with Trade-offs: Pick Your Poison. *JAMA Oncol*. 2016; 2: 425-6.  
57  
58  
59  
60



- 1  
2  
3 28) Dillon A. Carrying NICE over the threshold. NICE. 19 February 2015.  
4  
5 <https://www.nice.org.uk/news/blog/carrying-nice-over-the-threshold>  
6  
7  
8 29) Aggarwal A, Fojo T, Chamberlain C, et al. Do patient access schemes for high-cost cancer  
9  
10 drugs deliver value to society? -lessons from the NHS Cancer Drugs Fund. *Ann Oncol.*  
11  
12 2017; 28: 1738–1750. doi: 10.1093/annonc/mdx110  
13  
14 30) Cohen D. Cancer drugs: high price, uncertain value. *BMJ.* 2017; 359: j4543.  
15  
16 31) Prasad V. Do cancer drugs improve survival or quality of life? *BMJ.* 2017; 359: j4528  
17  
18 32) Vogler S, Vitry A, Babar ZU. Cancer drugs in 16 European countries, Australia, and New  
19  
20 Zealand: a cross-country price comparison study. *Lancet Oncol.* 2016; 17: 39-47,  
21  
22  
23 33) Folino-Gallo P, Montilla S, Bruzzone M, et al. Pricing and reimbursement of  
24  
25 pharmaceuticals in Italy. *Eur J Health Econ.* 2008; 9:305-10.  
26  
27 34) Stevens AJ, Jensen JJ, Wyller K, et al. The role of public-sector research in the discovery of  
28  
29 drugs and vaccines. *N Engl J Med.* 2011; 364: 535-41.  
30  
31 35) Kesselheim AS, Tan YT, Avorn J. The roles of academia, rare diseases, and repurposing in  
32  
33 the development of the most transformative drugs. *Health Aff (Millwood).* 2015; 34: 286-  
34  
35 93.  
36  
37 36) Martin L, Hutchens M, Hawkins C, et al. How much do clinical trials cost? *Nat Rev Drug*  
38  
39 *Discov.* 2017; 16: 381-382.  
40  
41 37) Italian Medicines Agency (AIFA) Research & Development Working Group. Feasibility  
42  
43 and challenges of independent research on drugs: the Italian medicines agency (AIFA)  
44  
45 experience. *Eur J Clin Invest.* 2010; 40: 69-86.  
46  
47 38) Traversa G, Masiero L, Sagliocca L, et al. Italian program for independent research on  
48  
49 drugs: 10-year follow-up of funded studies in the area of rare diseases. *Orphanet J Rare Dis.*  
50  
51 2016; 11: 36.  
52  
53  
54  
55  
56  
57  
58  
59  
60

- 1  
2  
3 39) Messori A. Application of the Price-Volume Approach in Cases of Innovative Drugs Where  
4 Value-Based Pricing is Inadequate: Description of Real Experiences in Italy. *Clin Drug*  
5 *Investig.* 2016; 36: 599-603.  
6  
7  
8  
9  
10 40) Bach PB. Indication-specific pricing for cancer drugs. *JAMA.* 2014; 312:1629-30.  
11  
12 41) Chandra A, Garthwaite C. The Economics of Indication-Based Drug Pricing. *N Engl J Med.*  
13 2017; 377:103-106..  
14  
15  
16 42) Kantarjian H, Rajkumar SV. Why are cancer drugs so expensive in the United States, and  
17 what are the solutions? *Mayo Clin Proc.* 2015; 90:500-4..  
18  
19  
20 43) Hwang TJ, Gyawali B. Association between progression-free survival and patients' quality  
21 of life in cancer clinical trials. *Int J Cancer.* 2019; 144:1746-1751. doi: 10.1002/ijc.31957.  
22  
23  
24 44) Prasad V, Kim C, Burotto M, Vandross A. The Strength of Association Between Surrogate  
25 End Points and Survival in Oncology: A Systematic Review of Trial-Level Meta-analyses.  
26 *JAMA Intern Med.* 2015; 175:1389-98. doi: 10.1001/jamainternmed.2015.2829.  
27  
28  
29  
30  
31  
32  
33  
34  
35  
36  
37  
38  
39  
40  
41  
42  
43  
44  
45  
46  
47  
48  
49  
50  
51  
52  
53  
54  
55  
56  
57  
58  
59  
60

1  
2  
3  
4  
5  
6  
7  
8  
9  
10  
11  
12  
13  
14  
15  
16  
17  
18  
19  
20  
21  
22  
23  
24  
25  
26  
27  
28  
29  
30  
31  
32  
33  
34  
35  
36  
37  
38  
39  
40  
41  
42  
43  
44  
45  
46  
47  
48  
49  
50  
51  
52  
53  
54  
55  
56  
57  
58  
59  
60

For peer review only

**Table 1.** Characteristics of the 30 anticancer drugs included in the analysis.

| Medicine Name | Active Substance               | Clinical setting                                                                                               | Treatment group                                                                         | Control group                                                               | PFS TRT (median in weeks) | PFS CRT (median in weeks) | OS TRT (median in weeks) | OS CRT (median in weeks) | ORR TRT (%) | ORR CRT (%) | Year First Auth. | Official negot. price (€) | Disc. price (€) |
|---------------|--------------------------------|----------------------------------------------------------------------------------------------------------------|-----------------------------------------------------------------------------------------|-----------------------------------------------------------------------------|---------------------------|---------------------------|--------------------------|--------------------------|-------------|-------------|------------------|---------------------------|-----------------|
| Teysuno       | tegafur / gimeracil / oteracil | advanced gastric cancer in combination with cisplatin.                                                         | teysuno 25 mg/m + cisplatin 75 mg/m <sup>2</sup>                                        | 5-fluorouracil 1000 mg/m <sup>2</sup> /24 + cisplatin 100 mg/m <sup>2</sup> |                           |                           | 34.4                     | 31.6                     |             |             | 2011             | 4942                      | 3479            |
| Jevtana       | cabazitaxel                    | hormone-refractory metastatic prostate cancer .                                                                | cabazitaxel + prednisone                                                                | mitoxantrone + prednisone                                                   | 11.2                      | 5.6                       | 60.4                     | 50.8                     | 14.4        | 4.4         | 2011             | 52983                     | 38254           |
| Yervoy        | ipilimumab                     | advanced (unresectable or metastatic) melanoma                                                                 | ipilimumab + placebo                                                                    | peptide vaccine glycoprotein 100 (gp100)                                    | 11.04                     | 11.04                     | 39.8                     | 25.8                     | 5.7         | 1.5         | 2011             | 71400                     | 45107           |
| Votubia       | everolimus                     | Renal angiomyolipoma associated with tuberous sclerosis complex (TSC)                                          | everolimus                                                                              | placebo                                                                     |                           | 45.48                     |                          |                          | 41.8        | 0           | 2011             | 66521                     | 41424           |
| Votubia       | everolimus                     | Subependymal giant cell astrocytoma (SEGA) associated with tuberous sclerosis complex (TSC)                    | everolimus                                                                              | placebo                                                                     |                           |                           |                          |                          | 34.6        | 0           |                  | 53216                     | 33139           |
| Halaven       | eribulin                       | locally advanced or metastatic breast cancer                                                                   | eribulin 1.23 mg/m <sup>2</sup> (equivalent to 1.4 mg/m <sup>2</sup> eribulin mesylate) | treatment of physician's choice                                             | 16.14                     | 9.71                      | 57.57                    | 45.86                    | 12.2        | 4.7         | 2011             | 32300                     | 28130           |
| Zytiga        | abiraterone acetate            | metastatic castration-resistant prostate cancer                                                                | abiraterone acetate                                                                     | placebo                                                                     | 22.4                      | 14.4                      | 68.9                     | 48.7                     | 29.1        | 5.5         | 2011             | 46842                     | 33397           |
| Dacogen       | decitabine                     | newly diagnosed de novo or secondary acute myeloid leukaemia (AML)                                             | decitabine                                                                              | patient's choice                                                            | 14.8                      | 8.4                       | 30.8                     | 20                       |             |             | 2012             | 54366                     | 34346           |
| Caprelsa      | vandetanib                     | aggressive and symptomatic medullary thyroid cancer (MTC) unresectable locally advanced or metastatic disease. | vandetanib                                                                              | placebo                                                                     | 122                       | 77.2                      |                          |                          | 45          | 13          | 2012             | 67405                     | 53533           |
| Zelboraf      | vemurafenib                    | BRAF-V600-mutation-positive unresectable or metastatic melanoma.                                               | vemurafenib                                                                             | dacarbazine                                                                 | 21.28                     | 6.44                      | 52.8                     | 39.6                     | 48.4        | 5.5         | 2012             | 119929                    | 108236          |
| Xalkori       | crizotinib                     | anaplastic lymphoma kinase (ALK) positive advanced non-small cell lung cancer (NSCLC).                         | crizotinib                                                                              | pemetrexed or docetaxel                                                     | 30.8                      | 12                        |                          |                          | 65.3        | 19.5        | 2012             | 79538                     | 57427           |

|           |                       |                                                                                                                                                       |                                      |                                                                     |       |      |       |       |      |      |      |        |        |
|-----------|-----------------------|-------------------------------------------------------------------------------------------------------------------------------------------------------|--------------------------------------|---------------------------------------------------------------------|-------|------|-------|-------|------|------|------|--------|--------|
| Xalkori   | crizotinib            | first-line treatment of adults with anaplastic lymphoma kinase (ALK) positive advanced non-small cell lung cancer (NSCLC).                            | crizotinib                           | chemotherapy                                                        | 43.6  | 28   |       |       | 74.4 | 45   |      | 79538  | 57427  |
| Inlyta    | axitinib              | advanced renal-cell carcinoma (RCC)                                                                                                                   | axitinib                             | sorafenib                                                           | 26.8  | 18.8 |       |       | 19.4 | 9.4  | 2012 | 57632  | 39295  |
| Perjeta   | pertuzumab            | HER2-positive metastatic or locally recurrent unresectable breast cancer                                                                              | pertuzumab + trastuzumab + docetaxel | placebo + trastuzumab + docetaxel                                   | 74    | 49.6 |       |       | 80.2 | 69.3 | 2013 | 51643  | 46608  |
| Kadcyla   | trastuzumab emtansine | HER2-positive, unresectable locally advanced or metastatic breast cancer                                                                              | trastuzumab emtansine (tdm1)         | lapatinib + capecitabine (lap+cap)                                  | 38.4  | 25.6 | 123.9 | 100.4 |      |      | 2013 | 87215  | 75877  |
| Giotrif   | afatinib              | locally advanced or metastatic non-small cell lung cancer (NSCLC) with activating EGFR mutation(s);                                                   | afatinib (film-coated tablets)       | pemetrexed (lyophilised powder) + cisplatin (solution for infusion) | 44.56 | 27.6 |       |       | 56.1 | 22.6 | 2013 | 29528  | 21853  |
| Stivarga  | regorafenib           | metastatic colorectal cancer (CRC)                                                                                                                    | regorafenib + best supportive care   | placebo + best supportive care                                      | 8.4   | 7.4  | 28    | 21.6  | 1    | 0.4  | 2013 | 85800  | 77434  |
| Stivarga  | regorafenib           | unresectable or metastatic gastrointestinal stromal tumors (GIST)                                                                                     | regorafenib + best supportive care   | placebo + best supportive care                                      | 21    | 4    |       |       | 1.5  | 4.5  |      | 85800  | 77434  |
| Tafinlar  | dabrafenib            | unresectable or metastatic melanoma with a BRAF V600 mutation.                                                                                        | dabrafenib                           | dacarbazine                                                         | 27.6  | 10.8 | 72.8  | 62.4  | 59   | 24   | 2013 | 107935 | 87670  |
| Zaltrap   | aflibercept           | metastatic colorectal cancer (MCRC)                                                                                                                   | aflibercept+folfiri                  | placebo+folfiri                                                     | 27.6  | 18.7 | 54    | 48.4  | 19.8 | 11.1 | 2013 | 30576  | 27591  |
| Xtandi    | enzalutamide          | metastatic castration resistant prostate cancer                                                                                                       | enzalutamide (mdv3100)               | placebo                                                             | 33.2  | 11.6 | 74.4  | 54.4  |      |      | 2013 | 49184  | 31960  |
| Imnovid   | pomalidomide          | relapsed and refractory multiple myeloma                                                                                                              | pom+ld-dex                           | hd-dex                                                              | 15.7  | 8    |       | 34    |      |      | 2013 | 127985 | 101646 |
| Lynparza* | olaparib              | platinum-sensitive relapsed BRCA-mutated (germline and/or somatic) high grade serous epithelial ovarian, fallopian tube, or primary peritoneal cancer | olaparib                             | placebo                                                             | 33.6  | 19.2 | 119.2 | 111.2 |      |      | 2014 | 70517  | 52142  |
| Cyramza   | ramucirumab           | advanced gastric cancer or gastro-oesophageal junction adenocarcinoma with disease progression                                                        | ramucirumab+ paclitaxel              | placebo+paclitaxel                                                  | 17.6  | 11.6 | 38.4  | 29.6  | 27.9 | 16.1 | 2014 | 87360  | 78842  |
| Mekinist  | trametinib            | unresectable or metastatic melanoma with a BRAF V600 mutation.                                                                                        | trametinib                           | chemotherapy (dtic or paclitaxel)                                   | 19.6  | 6    | 62.4  | 45.2  | 19   | 5    | 2014 | 62398  | 28157  |

|    |           |                          |                                                                                                                                                                |                                            |                                   |       |  |  |  |      |      |      |      |      |      |       |                |
|----|-----------|--------------------------|----------------------------------------------------------------------------------------------------------------------------------------------------------------|--------------------------------------------|-----------------------------------|-------|--|--|--|------|------|------|------|------|------|-------|----------------|
| 1  | Imbruvica | ibrutinib                | chronic lymphocytic leukaemia (CLL)                                                                                                                            | ibrutinib                                  | chlorambucil                      |       |  |  |  | 75.6 |      |      | 82.4 | 35.3 |      | 73805 | 51663          |
| 2  | Zydelig   | idelalisib               | chronic lymphocytic leukaemia (CLL)                                                                                                                            | idelalisib + rituximab                     | placebo + rituximab               |       |  |  |  | 22   |      |      | 74.5 | 14.5 | 2014 | 48667 | 34067          |
| 3  | Sylvant   | siltuximab               | multicentric Castlemans disease                                                                                                                                | siltuximab + best supportive care          | placebo + best supportive care    |       |  |  |  |      |      |      | 37.7 | 3.8  | 2014 | 66104 | 29829          |
| 4  | Keytruda  | pembrolizumab            | advanced(unresectable or metastatic) melanoma                                                                                                                  | ipilimumab                                 | pembrolizumab                     | 22    |  |  |  | 11.2 |      |      | 33.7 | 11.9 | 2015 | 90400 | 81586          |
| 5  | Opdivo    | nivolumab                | advanced (unresectable or metastatic) melanoma                                                                                                                 | nivolumab 3 mg/kg                          | dacarbazine                       | 18.8  |  |  |  | 16.8 |      |      | 31.7 | 10.6 | 2015 | 81310 | 71181          |
| 6  | Opdivo    | nivolumab                | locally advanced or metastatic non-small cell lung cancer (NSCLC)                                                                                              | nivolumab 3 mg/kg                          | docetaxel 75 mg/m2                | 9.32  |  |  |  | 16.8 | 48.8 | 37.4 | 19.2 | 12.4 |      | 81310 | 71181          |
| 7  | Opdivo    | nivolumab                | advanced renal cell carcinoma                                                                                                                                  | nivolumab 3 mg/kg                          | everolimus100mg                   | 18.4  |  |  |  | 17.8 | 100  | 78.2 | 25.1 | 5.4  |      | 81310 | in negotiation |
| 8  | Lenvima   | lenvatinib mesylate      | progressive, locally advanced or metastatic, differentiated (papillary/follicular/Hrthle cell) thyroid carcinoma (DTC), refractory to radioactive iodine (RAI) | lenvatinib                                 | placebo                           | 73.2  |  |  |  | 14.4 |      |      | 64.8 | 1.5  | 2015 | 68433 | 58673          |
| 9  | Cotellic  | cobimetinib hemifumarate | unresectable or metastatic melanoma with a BRAF V600 mutation                                                                                                  | cobimetinib+vemurafenib                    | placebo+vemurafenib               | 45.2  |  |  |  | 24   |      |      | 67.8 | 44.8 | 2015 | 75374 | 54420          |
| 10 | Kyprolis  | carfilzomib              | multiple myeloma who have received at least one prior therapy.                                                                                                 | carfilzomib + lenalidomide + dexamethasone | lenalidomide + dexamethasone (rd) | 105.2 |  |  |  | 70.4 |      |      | 87.1 | 67.7 | 2015 | 75900 | 44525          |

Progression Free Survival (PFS); Overall Survival (OS); Treatment Group (TRT); Control Group (CTR); Objective Response Rate (ORR); Official Negotiated Prices (Official Negot.); Discounted Prices (Disc. Prices).

\*: During the evaluation at the EMA, lymparza was found to be more effective in a subgroup of patients with a specific biomarker with the following outcome results: PFS lymparza: 44,8 w; PFS control: 17,2 w; OS lymparza: 139,6 w; OS control: 127,6.

1  
2  
3  
4  
5  
6  
7  
8  
9  
10  
11  
12  
13  
14  
15  
16  
17  
18  
19  
20  
21  
22  
23  
24  
25  
26  
27  
28  
29  
30  
31  
32  
33  
34  
35  
36  
37  
38  
39  
40  
41  
42  
43  
44  
45  
46

For peer review only

1  
2  
3  
4  
5  
6  
7  
8  
9  
10  
11  
12  
13  
14  
15  
16  
17  
18  
19  
20  
21  
22  
23  
24  
25  
26  
27  
28  
29  
30  
31  
32  
33  
34  
35  
36  
37  
38  
39  
40  
41  
42  
43  
44  
45  
46  
47  
48  
49  
50  
51  
52  
53  
54  
55  
56  
57  
58  
59  
60

## Figure, tables, titles and legends

### Figure 1. Correlation between anticancer drug prices (officially negotiated) and health benefits

*Figure 1a. Official negotiated price (ex-factory) vs difference in median OS (16 drugs are included in the analysis: 15 with a single indication and one with two indications)*

*Figure 1b. Official negotiated price (ex-factory) vs difference in median PFS (25 drugs are included in the analysis: 22 with a single indication, two with two indications and one with three indication)*

*Figure 1c. Official negotiated price (ex-factory) vs proportion of ORR (24 drugs are included in the analysis: 20 with a single indication, three with two indications and one with three indications)*

Legend: Progression Free Survival (PFS); Overall Survival (OS); Objective Response Rate (ORR);

### Figure 2. Correlation between anticancer drug prices (discounted) and health benefits

*Figure 2a. Discounted price with additional compulsory rebates vs difference in median OS (16 drugs related to a single indication are included in the analysis)*

*Figure 2b. Discounted price with additional compulsory rebates vs difference in median PFS (25 drugs are included in the analysis: 22 with a single indication and three with two indications)*

*Figure 2c. Discounted price with additional compulsory rebates vs proportion of ORR (24 drugs are included in the analysis: 20 with a single indication and four with two indications)*

Legend: Progression Free Survival (PFS); Overall Survival (OS); Objective Response Rate (ORR);

### Table 1. Characteristics of the 30 anticancer drugs included in the analysis.

Legend:

Progression Free Survival (PFS); Overall Survival (OS); Treatment Group (TRT); Control Group (CTR); Objective Response Rate (ORR); Official Negotiated Prices (Official Negot.); Discounted Prices (Disc. Prices).

\*: During the evaluation at the EMA, lymparza was found to be more effective in a subgroup of patients with a specific biomarker with the following outcome results: PFS lymparza: 44,8 w; PFS control: 17,2 w; OS lymparza: 139,6 w; OS control: 127,6.

### Supplementary Table 1. Details of the statistical analysis conducted

### Supplementary Figures 1-4. Correlations in the sensitivity analysis conducted

*Supplementary Figure 1a. Official negotiated price (ex-factory) vs percentage improvement in median Overall Survival (OS) (16 drugs are included in the analysis: 15 with a single indication and one with two indications)*

*Supplementary Figure 1b. Official negotiated price (ex-factory) vs percentage improvement in median Progression Free Survival (PFS) (25 drugs are included in the analysis: 22 with a single indication, two with two indications and one with three indication)*



1  
2  
3 *Supplementary Figure 1c. Official negotiated price (ex-factory) vs percentage improvement in*  
4 *proportion of Objective Response Rate (ORR) (24 drugs are included in the analysis: 20 with a*  
5 *single indication, three with two indications and one with three indications)*  
6

7  
8 *Figure 2. Official negotiated price (ex-factory) vs median Progression Free Survival (PFS),*  
9 *excluding negative outcome data (25 drugs are included in the analysis: 22 with a single indication*  
10 *and three with two indications)*  
11

12 *Supplementary Figure 3a. Official negotiated price (ex-factory) vs median Overall Survival (OS),*  
13 *considering only data from placebo-controlled trials. (7 drugs related to a single indication are*  
14 *included in the analysis)*  
15

16 *Supplementary Figure 3b. Official negotiated price (ex-factory) vs median Progression Free*  
17 *Survival (PFS), considering only data from placebo-controlled trials. (11 drugs are included in the*  
18 *analysis: 10 with a single indication and one with 2 indications)*  
19

20  
21 *Supplementary Figure 4a. Official negotiated price (ex-factory) vs median Progression Free*  
22 *Survival (PFS), stratified by type of cancer (at least 2 indications for each cancer type). (24 drugs*  
23 *are included in the analysis: 21 with a single indication, two with two indications and one with three*  
24 *indication)*  
25

26 *Supplementary Figure 4b. Discounted price with additional compulsory rebates vs median*  
27 *Progression Free Survival (PFS), stratified by type of cancer (at least 2 indications for each cancer*  
28 *type). (24 drugs are included in the analysis: 21 with a single indication and three with 2*  
29 *indications)*  
30  
31

32 Legend: Progression Free Survival (PFS); Overall Survival (OS); Objective Response Rate (ORR);  
33  
34  
35  
36  
37  
38  
39  
40  
41  
42  
43  
44  
45  
46  
47  
48  
49  
50  
51  
52  
53  
54  
55  
56  
57  
58  
59  
60

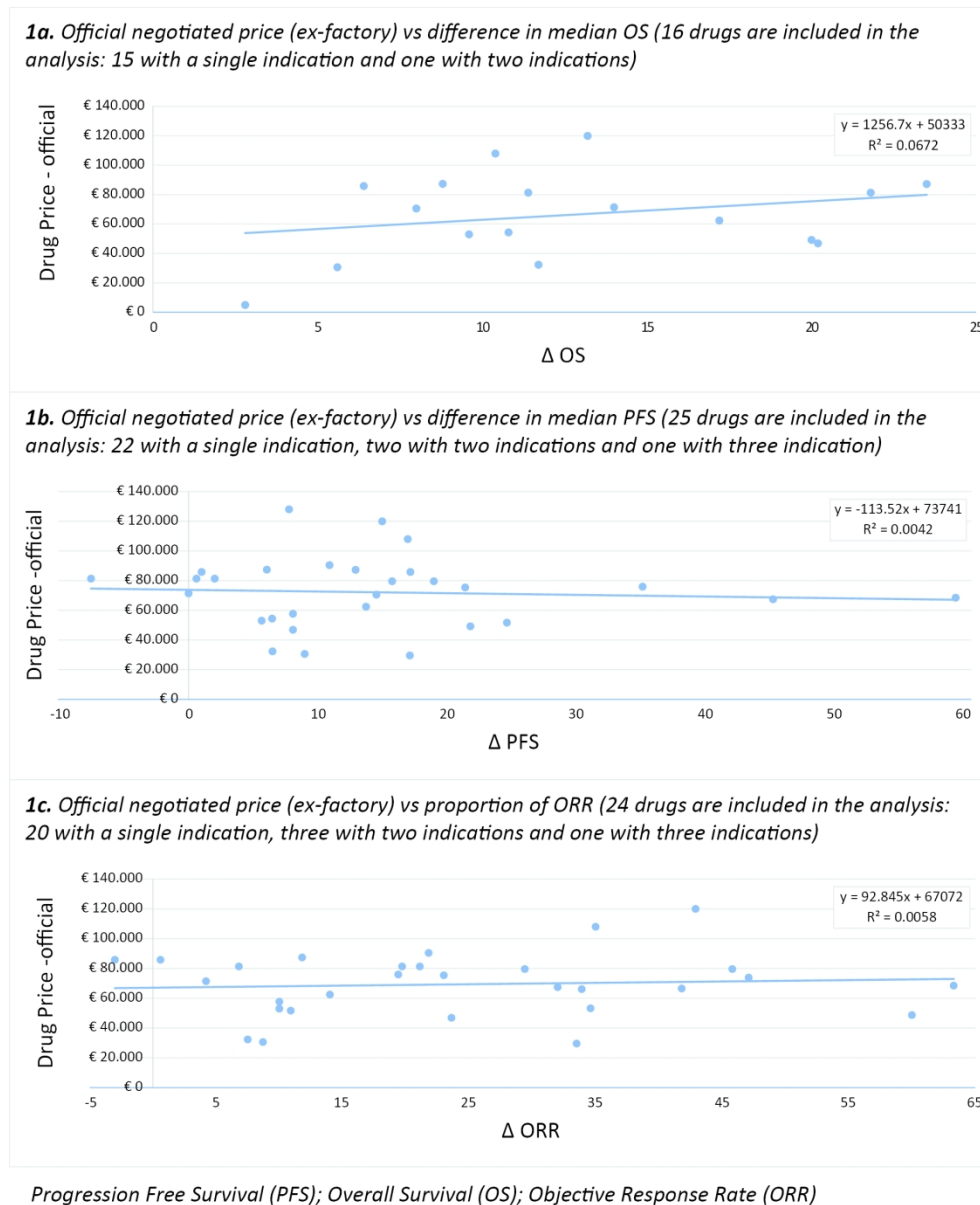

45 Figure 1. Correlation between anticancer drug prices (officially negotiated) and health benefits

46 180x219mm (300 x 300 DPI)

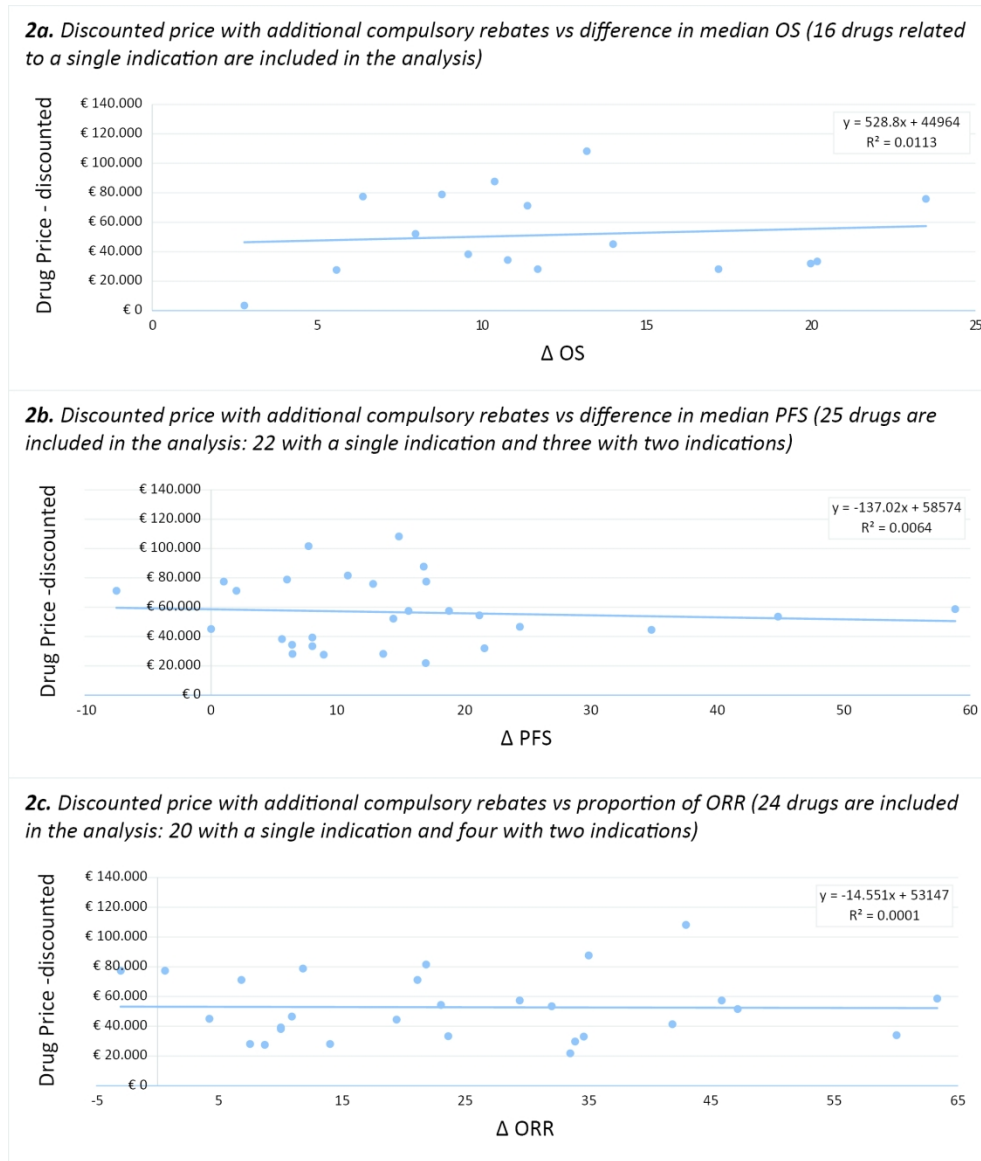

*Progression Free Survival (PFS); Overall Survival (OS); Objective Response Rate (ORR)*

Figure 2. Correlation between anticancer drug prices (discounted) and health benefits

180x219mm (300 x 300 DPI)

**Supplementary Table 1.** Details of the statistical analysis conducted

| Dependent variable        | Independent variable 1 | Independent variable 2 | Number of drugs involved in the analysis | Type of linear regression | Intercept | Coefficient of the Independent variable 1 | p value of the Independent variable 1 | Correlation coefficient: r | Coefficient of Determination: R <sup>2</sup> |
|---------------------------|------------------------|------------------------|------------------------------------------|---------------------------|-----------|-------------------------------------------|---------------------------------------|----------------------------|----------------------------------------------|
| Official negotiated price | Δ OS                   |                        | 17                                       | simple                    | 50332.71  | 1256.724                                  | 0.315                                 | 0.259                      | 0.067                                        |
| Discounted price          | Δ OS                   |                        | 16                                       | simple                    | 44963.88  | 528.800                                   | 0.695                                 | 0.11                       | 0.0113                                       |
| Official negotiated price | Δ OS                   | tumor type             | 17                                       | multiple                  | 57765.99  | 2065.264                                  | 0.433                                 |                            | 0.412                                        |
| Discounted price          | Δ OS                   | tumor type             | 16                                       | multiple                  | 55312.8   | 1391.947                                  | 0.614                                 |                            | 0.257                                        |
| Official negotiated price | % Δ OS                 |                        | 17                                       | simple                    | 56230.04  | 349.505                                   | 0.524                                 | 0.166                      | 0.027                                        |
| Discounted price          | % Δ OS                 |                        | 16                                       | simple                    | 50127.28  | 42.986                                    | 0.937                                 | 0.022                      | 0.0005                                       |
| Official negotiated price | % Δ OS                 | tumor type             | 17                                       | multiple                  | 72407.98  | 292.048                                   | 0.766                                 |                            | 0.362                                        |
| Discounted price          | % Δ OS                 | tumor type             | 16                                       | multiple                  | 68456.17  | 89.3936                                   | 0.930                                 |                            | 0.2286                                       |
| Official negotiated price | Δ PFS                  |                        | 29                                       | simple                    | 73741.11  | -113.515                                  | 0.738                                 | -0.065                     | 0.004                                        |
| Discounted price          | Δ PFS                  |                        | 28                                       | simple                    | 58574.12  | -137.018                                  | 0.687                                 | -0.080                     | 0.006                                        |
| Official negotiated price | Δ PFS                  | tumor type             | 29                                       | multiple                  | 70454.93  | -271.324                                  | 0.635                                 |                            | 0.338                                        |
| Discounted price          | Δ PFS                  | tumor type             | 28                                       | multiple                  | 56293.38  | -393.926                                  | 0.508                                 |                            | 0.283                                        |
| Official negotiated price | % Δ PFS                |                        | 29                                       | simple                    | 68763.32  | 33.7994                                   | 0.427                                 | 0.153                      | 0.024                                        |
| Discounted price          | % Δ PFS                |                        | 28                                       | simple                    | 52823.84  | 36.2925                                   | 0.392                                 | 0.169                      | 0.028                                        |
| Official negotiated price | % Δ PFS                | tumor type             | 29                                       | multiple                  | 66564.96  | 15.935                                    | 0.765                                 |                            | 0.333                                        |
| Discounted price          | % Δ PFS                | tumor type             | 28                                       | multiple                  | 51337.49  | 11.068                                    | 0.842                                 |                            | 0.266                                        |
| Official negotiated price | Δ ORR                  |                        | 29                                       | simple                    | 67072.16  | 92.845                                    | 0.696                                 | 0.076                      | 0.006                                        |
| Discounted price          | Δ ORR                  |                        | 28                                       | simple                    | 53147.09  | -14.550                                   | 0.953                                 | -0.010                     | 0.000                                        |
| Official negotiated price | Δ ORR                  | tumor type             | 29                                       | multiple                  | 62277.57  | 180.118                                   | 0.607                                 |                            | 0.448                                        |
| Discounted price          | Δ ORR                  | tumor type             | 28                                       | multiple                  | 42598.33  | 324.629                                   | 0.383                                 |                            | 0.450                                        |
| Official negotiated price | % Δ ORR                |                        | 27                                       | simple                    | 69838.7   | 0.563                                     | 0.918                                 | 0.020                      | 0.000                                        |
| Discounted price          | % Δ ORR                |                        | 26                                       | simple                    | 53627.54  | 0.965                                     | 0.864                                 | 0.036                      | 0.001                                        |
| Official negotiated price | % Δ ORR                | tumor type             | 27                                       | multiple                  | 67262.18  | 1.719                                     | 0.814                                 |                            | 0.436                                        |
| Discounted price          | % Δ ORR                | tumor type             | 26                                       | multiple                  | 51599.74  | 2.958                                     | 0.704                                 |                            | 0.405                                        |

Progression Free Survival (PFS); Overall Survival (OS); Objective Response Rate (ORR)

**1a. Official negotiated price (ex-factory) vs percentage improvement in median Overall Survival (OS)** (16 drugs are included in the analysis: 15 with a single indication and one with two indications)

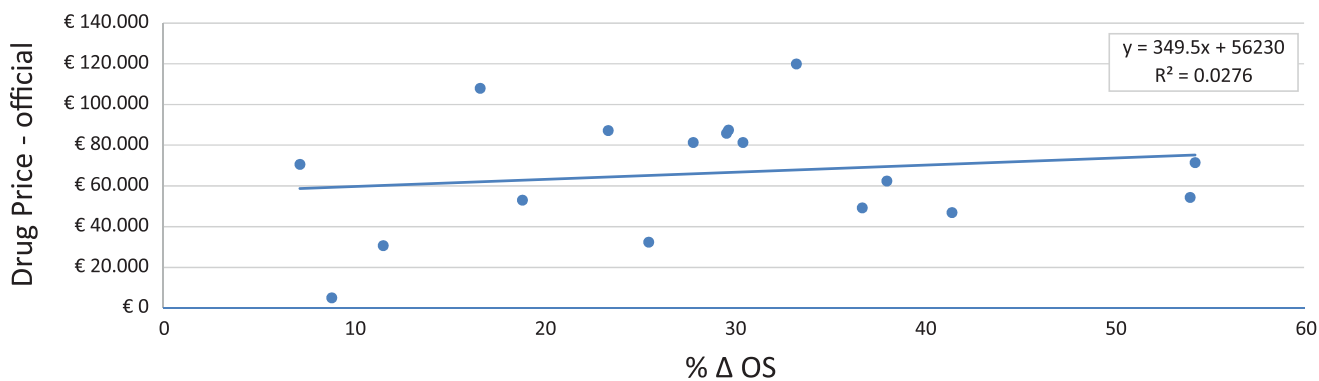

**1b. Official negotiated price (ex-factory) vs percentage improvement in median Progression Free Survival (PFS)** (25 drugs are included in the analysis: 22 with a single indication, two with two indications and one with three indication)

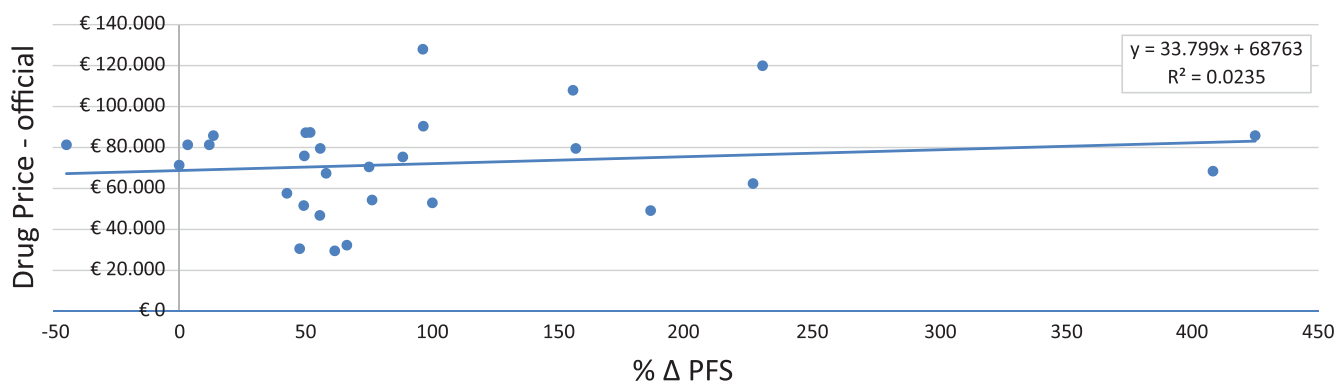

**1c. Official negotiated price (ex-factory) vs percentage improvement in proportion of Objective Response Rate (ORR)** (24 drugs are included in the analysis: 20 with a single indication, three with two indications and one with three indications)

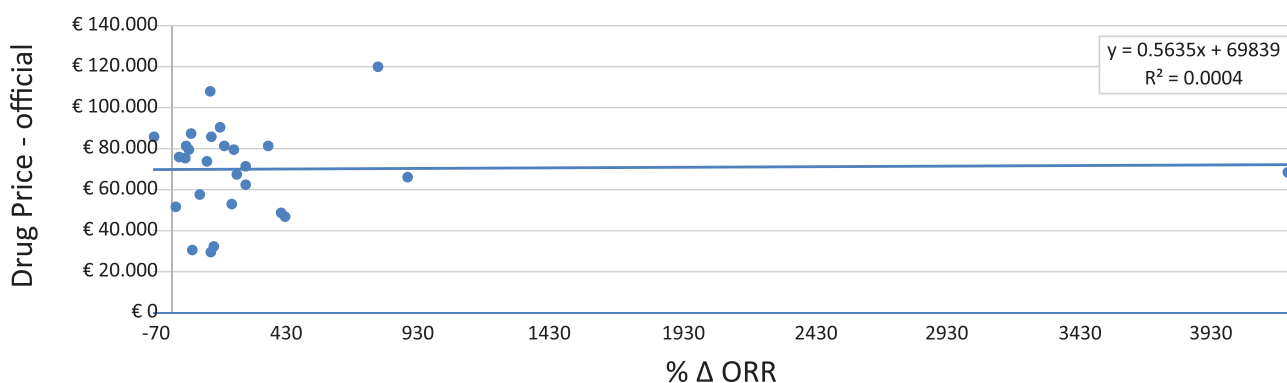

Progression Free Survival (PFS); Overall Survival (OS); Objective Response Rate (ORR)

1  
2  
3  
4  
5  
6  
7  
8  
9  
10  
11  
12  
13  
14  
15  
16  
17  
18  
19  
20  
21  
22  
23  
24  
25  
26  
27  
28  
29  
30  
31  
32  
33  
34  
35  
36  
37  
38  
39  
40  
41  
42  
43  
44  
45  
46  
47  
48  
49  
50  
51  
52  
53  
54  
55  
56  
57  
58  
59  
60

**2. Official negotiated price (ex-factory) vs median Progression Free Survival (PFS), excluding negative outcome data (25 drugs are included in the analysis: 22 with a single indication and three with two indications)**

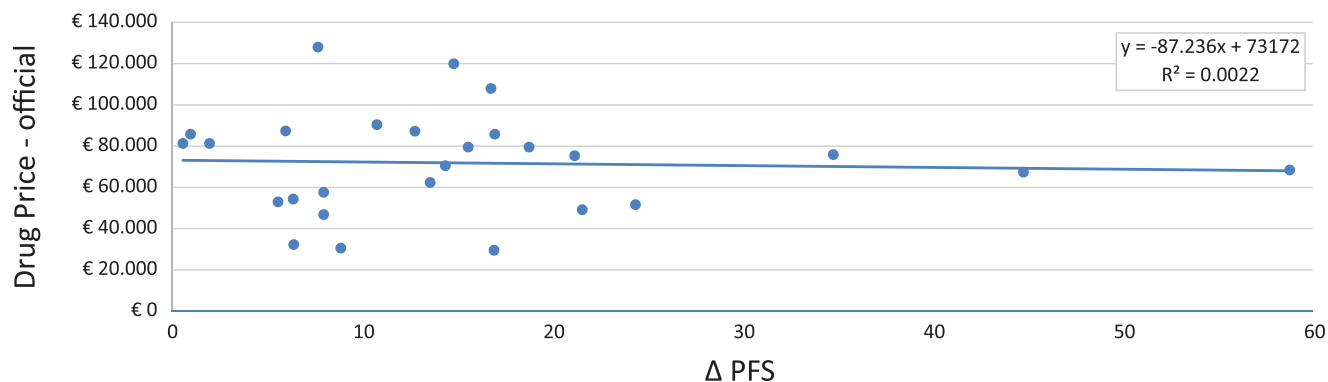

Progression Free Survival (PFS)

For peer review only

**3a. Official negotiated price (ex-factory) vs median Overall Survival (OS), considering only data from placebo-controlled trials. (7 drugs related to a single indication are included in the analysis)**



**3b. Official negotiated price (ex-factory) vs median Progression Free Survival (PFS), considering only data from placebo-controlled trials. (11 drugs are included in the analysis: 10 with a single indication and one with 2 indications)**



Progression Free Survival (PFS); Overall Survival (OS)

**4a.** Official negotiated price (ex-factory) vs median Progression Free Survival (PFS), stratified by type of cancer (at least 2 indications for each cancer type). (24 drugs are included in the analysis: 21 with a single indication, two with two indications and one with three indication)

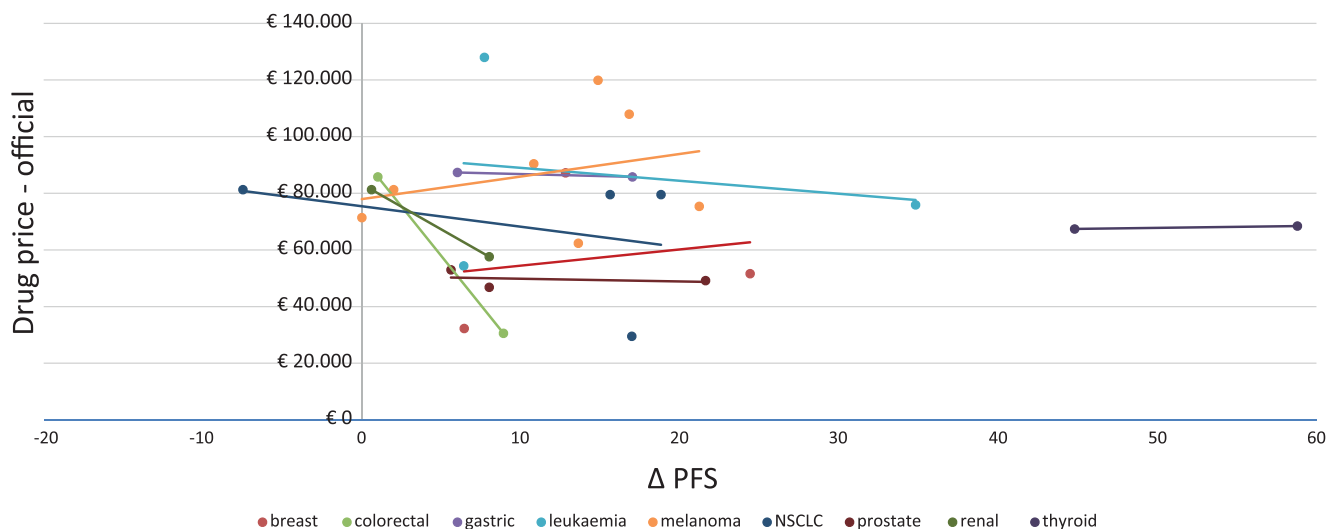

**4b.** Discounted price with additional compulsory rebates vs median Progression Free Survival (PFS), stratified by type of cancer (at least 2 indications for each cancer type). (24 drugs are included in the analysis: 21 with a single indication and three with 2 indications)

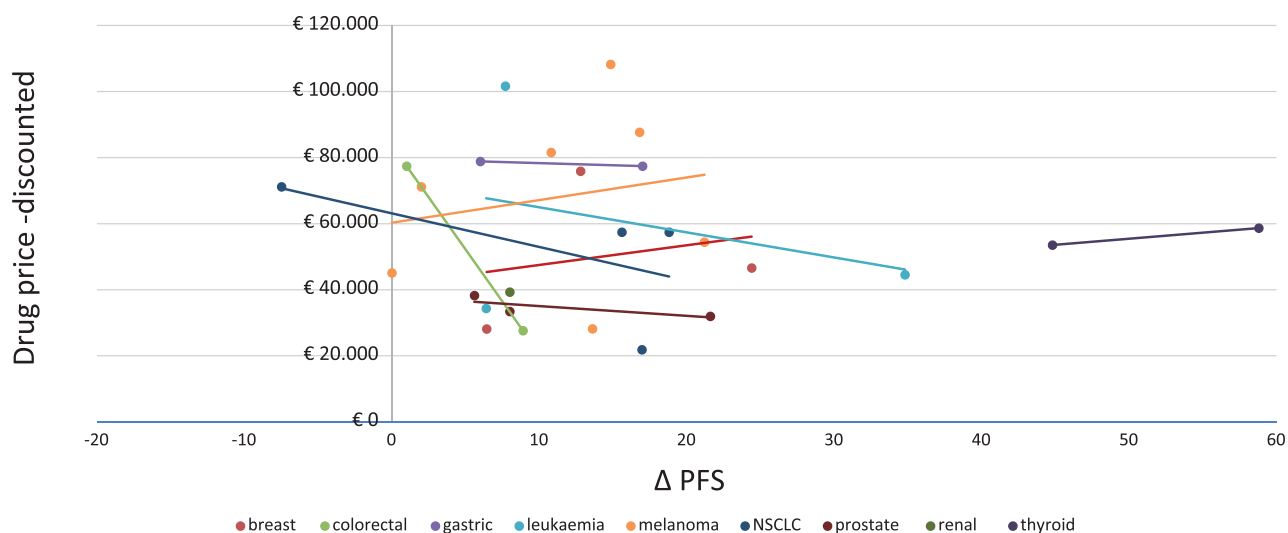

Progression Free Survival (PFS)



# BMJ Open

## Anticancer drug prices and clinical outcomes: a cross-sectional study in Italy

|                                 |                                                                                                                                                                                                                                                                                                                                                                                                                                                                                                                                                                                                                                                                                                                                                                                                                                          |
|---------------------------------|------------------------------------------------------------------------------------------------------------------------------------------------------------------------------------------------------------------------------------------------------------------------------------------------------------------------------------------------------------------------------------------------------------------------------------------------------------------------------------------------------------------------------------------------------------------------------------------------------------------------------------------------------------------------------------------------------------------------------------------------------------------------------------------------------------------------------------------|
| Journal:                        | <i>BMJ Open</i>                                                                                                                                                                                                                                                                                                                                                                                                                                                                                                                                                                                                                                                                                                                                                                                                                          |
| Manuscript ID                   | bmjopen-2019-033728.R3                                                                                                                                                                                                                                                                                                                                                                                                                                                                                                                                                                                                                                                                                                                                                                                                                   |
| Article Type:                   | Original research                                                                                                                                                                                                                                                                                                                                                                                                                                                                                                                                                                                                                                                                                                                                                                                                                        |
| Date Submitted by the Author:   | 10-Nov-2019                                                                                                                                                                                                                                                                                                                                                                                                                                                                                                                                                                                                                                                                                                                                                                                                                              |
| Complete List of Authors:       | Trotta, Francesco; Department of Epidemiology of the Regional Health Service Lazio,<br>Mayer, Flavia; Istituto Superiore di Sanita<br>Barone-Adesi, Francesco; Universita degli Studi del Piemonte Orientale<br>Amedeo Avogadro,<br>Esposito, Immacolata; Research and Health Foundation<br>Punreddy, Ranadhir; Universita degli Studi del Piemonte Orientale<br>Amedeo Avogadro<br>Da Cas, Roberto; Italian National Institute of Health, National Centre for Epidemiology<br>Traversa, Giuseppe; Italian National Institute of Health, National Centre for Epidemiology<br>Perrone, Francesco; Istituto Nazionale Tumori IRCCS Fondazione Pascale<br>Martini, Nello; Research and Health Foundation,<br>Gyawali, Bishal ; Harvard Medical School<br>Addis, Antonio; Department of Epidemiology of the Regional Health Service Lazio, ; |
| <b>Primary Subject Heading</b>: | Oncology                                                                                                                                                                                                                                                                                                                                                                                                                                                                                                                                                                                                                                                                                                                                                                                                                                 |
| Secondary Subject Heading:      | Health economics, Health policy                                                                                                                                                                                                                                                                                                                                                                                                                                                                                                                                                                                                                                                                                                                                                                                                          |
| Keywords:                       | Drug Costs, Antineoplastic Agents/therapeutic use, Treatment Outcome, Antineoplastic Agents                                                                                                                                                                                                                                                                                                                                                                                                                                                                                                                                                                                                                                                                                                                                              |
|                                 |                                                                                                                                                                                                                                                                                                                                                                                                                                                                                                                                                                                                                                                                                                                                                                                                                                          |

SCHOLARONE™  
Manuscripts

1  
2  
3 **Article type:** Original article  
4  
5

6 **Title:** Anticancer drug prices and clinical outcomes: a cross-sectional study in Italy  
7  
8

9 **Authors:** Francesco Trotta<sup>1</sup>, Flavia Mayer<sup>2</sup>, Francesco Barone-Adesi<sup>3</sup>, Immacolata Esposito<sup>4</sup>,  
10 Ranadhir Punreddy<sup>3</sup>, Roberto Da Cas<sup>2</sup>, Giuseppe Traversa<sup>2</sup>, Francesco Perrone<sup>5</sup>, Nello Martini<sup>4</sup>,  
11 Bishal Gyawali<sup>6,7</sup>, Antonio Addis<sup>1</sup>.  
12  
13  
14  
15

16  
17 **Affiliation:**  
18

- 19 1. Department of Epidemiology, Lazio Regional Health Service, Rome, Italy
- 20 2. Italian National Institute of Health, Rome, Italy
- 21 3. University of Eastern Piedmont, Novara, Italy
- 22 4. Research and Health Foundation, Rome, Italy
- 23 5. National Cancer Institute, G. Pascale Foundation - IRCCS, Naples, Italy
- 24 6. Program on Regulation, Therapeutics and Law, Department of Medicine, Brigham and  
25 Women's Hospital and Harvard Medical School, Boston, Massachusetts, USA.
- 26 7. Department of Oncology, and Division of Cancer Care and Epidemiology, Queen's  
27 University, Kingston, Canada  
28  
29

30 **Corresponding Author:**

31 Antonio Addis  
32 Department of Epidemiology  
33 Lazio Regional Health Service, Rome, Italy Via Cristoforo Colombo 112/Pal.A  
34 00143 Roma/ Rome Italy  
35 Tel: +39 06.99722-139  
36 Fax: +39 06.99722111  
37 ORCID [0000-0003-0962-9959](https://orcid.org/0000-0003-0962-9959)  
38 [agmaddis@gmail.com](mailto:agmaddis@gmail.com)  
39  
40  
41

42 *This research received no specific grant from any funding agency in the public, commercial or not-*  
43 *for-profit sectors*  
44

45 **contributorship statement**  
46

47 FT, NM and AA conceptualized the study; FT, AA, NM, FM, FBA, GT, and RDC designed the study;  
48 FBA, RP, IE and NM were in charge of data extraction and quality control; FM, RDC, and FT  
49 performed the data analysis; FT, RDC, FM, GT, BG, FP and AA drafted the manuscript; all the  
50 authors contributed to the discussion and the interpretation of results, and reviewed the final version  
51 of the manuscript. All authors approved the final manuscript as submitted.  
52  
53

54  
55 The authors have no conflicts of interest relevant to this article to disclose and all authors work for  
56 public Universities, Public Institutions or non-profit organizations  
57  
58

1  
2  
3 **Running head.** Anticancer drug prices and clinical outcomes in Italy  
4

5 **Word Count:** 2950  
6  
7

8 **Abstract:**  
9

10  
11 **Objective** To investigate whether the prices of new anticancer drugs correlated with their relative  
12 benefit despite negotiation.  
13  
14

15  
16 **Design** Retrospective cross-sectional study correlating new anticancer drugs prices with clinical  
17 outcomes.  
18  
19

20  
21  
22 **Setting** We did a retrospective cross-sectional study including all new anticancer drugs approved by  
23 the European Medicines Agency (2010-2016) and reimbursed in Italy.  
24  
25

26  
27 **Main Outcome(s) and Measure(s)** Information on clinical outcomes - in terms of median Overall  
28 Survival (OS), median Progression Free Survival (PFS) and Objective Response Rate (ORR) - was  
29 extracted from pivotal trials as reported in the European Public Assessment Reports available on the  
30 EMA website. Cost of a full course treatment was estimated on negotiated official and discounted  
31 prices. Regression coefficients  $\beta$ , their levels of significance  $p$  and the coefficients of determination  
32  $R^2$  were estimated adjusting by tumour type.  
33  
34  
35  
36  
37  
38  
39  
40  
41

42 **Results** Overall, 30 new anticancer drugs (with 35 indications) were available for analysis. Where  
43 data on Overall Survival were available we observed no correlation between the improvement in  
44 median OS (in weeks) and negotiated price ( $R^2= 0.067$ ,  $n = 16$  drugs for 17 indications). When the  
45 clinical outcomes were expressed as improvements in median PFS or ORR, 25 drugs (29 indications)  
46 were available for analysis, and again, there was no correlation with prices ( $R^2= 0.004$  and  $0.006$ ,  
47 respectively).  
48  
49  
50  
51  
52  
53  
54  
55  
56  
57  
58  
59  
60

1  
2  
3 **Conclusions and Relevance:** Our results suggest that the prices of anticancer drugs in Italy do not  
4 reflect their therapeutic benefit. Drug price negotiations, which is mandatory by law in Italy, do not  
5 seem to ensure that prices correlate with clinical benefits provided by cancer drugs. These results call  
6 for further efforts to establish the standard determinants of drug prices available at the time of  
7 negotiation. These findings need to be confirmed in other countries where price negotiations are in  
8 place. Moreover, further investigations may verify whether outcome data obtained after drug  
9 marketing would improve the correlation between prices and therapeutic benefit.  
10  
11  
12  
13  
14  
15  
16  
17  
18  
19

### 20 **Strengths and limitations of this study,**

- 21 • This study is the first attempt to evaluate whether there were better correlations between  
22 cancer drug prices and clinical outcomes in a setting where central price negotiations are  
23 mandatory for every new medicine.  
24
- 25 • This understanding is important for cancer policy decisions.  
26
- 27 • In our analysis, the relationship between the clinical outcome and cost of anticancer drugs  
28 was ascertained by a simple linear regression model.  
29
- 30 • Clinical outcome, which was the dependent variable, was expressed as absolute or percent  
31 differences in outcomes between treatment and control groups.  
32
- 33 • The main limitations of our study concern data completeness on clinical outcome and price.  
34 We used, as an estimate of benefit, data from pivotal trials retrieved from EPARs.  
35  
36  
37  
38  
39  
40  
41  
42  
43  
44  
45  
46  
47  
48  
49  
50  
51  
52  
53  
54  
55  
56  
57  
58  
59  
60

## Background

High costs of cancer drugs and resulting financial toxicity to cancer patients are now a well-recognized problem in cancer policy throughout the world [1-8]. Various solutions are being proposed to address this problem, of which price negotiations with pharmaceutical companies is proposed as an important strategy especially in the USA [9-11]. Because the Medicare is not allowed to negotiate prices with companies, despite being mandated to cover for every U.S. Food and Drug Administration (FDA) approved drug, various experts have argued that this is the reason for high drug prices in the USA. Indeed, cancer drug prices far exceed the costs of their development [12]; such negotiations might help to lower the prices of cancer drugs as evidenced by lower cost of cancer drugs in other developed countries compared with the USA.

However, little is known about if such negotiations would lead to better correlation between cancer drug prices and the benefits they provide. Studies have shown that drug prices do not correlate with clinical benefits for cancer drugs approved by the FDA, even though such studies have not taken central price negotiations into account [13,14]. Countries such as the United Kingdom and Italy negotiate prices and hence, the correlations might be different.

In Italy, drug price negotiation based on cost-effectiveness evaluation has been mandatory since 2001 for all medicines reimbursed by the National Health Service (NHS) [15,16]. We analysed the correlation between the prices of cancer drugs in Italy with their clinical outcomes to test the hypothesis that central price negotiations leads to better alignment of prices and benefits.

## Methods:

### *Identification of the study sample*

All new drugs approved by the EMA via a centralized procedure between January 2010 and June 2016 for the treatment of either solid or haematologic cancers were initially identified. Generics, biosimilars, interferons and granulocyte-colony stimulating factors (G-CSFs) were excluded. Only anticancer drugs with pivotal trials based on overall survival (OS), progression-free survival (PFS) or objective response rate (ORR) and with prices that were officially negotiated in Italy by 31<sup>st</sup> December 2016 were included in the cohort for analyses.

### *Data extraction*

Information on the clinical outcomes (in terms of median OS, median PFS, ORR) was extracted by two co-investigators (FBA and RP) from pivotal trials that compared new treatments with controls as reported in the European Public Assessment Reports - EPARs (summary table of the main study, Section 2.5.2) publicly available on the EMA website ([www.ema.europa.eu](http://www.ema.europa.eu)). Survival times were expressed in weeks, and the reported OS and PFS were transformed when necessary. Information on therapeutic indication and tumour type were also retrieved.

### *Drug prices*

The cost of a full course or 1-year treatment was estimated by two co-investigators (NM and IE) on the basis of the negotiated official ex-factory price (in euros) of drug packages, as published in the Official Gazette of the Italian Republic ([www.gazzettaufficiale.it](http://www.gazzettaufficiale.it)) and taking into account the posology as reported in the Summary of Product Characteristics (SPC). To compare prices of drugs with different schedules, in the text we refer to drug prices as the cost of a full course or a 1-year treatment. A further estimate took into account additional compulsory rebates [17] or extra-discounts

1  
2  
3 that were agreed with pharmaceutical companies; this information is confidential to the public but is  
4 released to procurement stations within the Italian NHS (e.g., regions, hospitals, and local health  
5 units).  
6  
7  
8  
9

### 10 *Statistical analysis*

11  
12  
13  
14 The following variables were extracted and analysed descriptively: year of approval, therapeutic  
15 indication, type of treatment and control groups, outcome data, official and confidential costs per  
16 treatment (1 year or a full course) and regulatory information (conditional/under exceptional  
17 circumstances approval, or orphan drug status).  
18  
19  
20  
21  
22  
23

24 The relationship between the clinical outcomes and cost of anticancer drugs was ascertained by a  
25 simple linear regression model. Clinical outcome, which was the dependent variable, was expressed  
26 as absolute or percent differences in outcomes between treatment and control groups. Regression  
27 coefficients  $\beta$ , their levels of significance  $p$  and the coefficients of determination  $R^2$  were reported  
28 for each model.  
29  
30  
31  
32  
33  
34

35  
36 We also performed several sensitivity analyses to test the robustness of the results. Specifically, we  
37 performed multiple linear regression with tumour type as the independent variable to take into  
38 account potential differences due to tumour characteristics. Moreover, we also repeated the analysis  
39 after excluding negative outcome differences (in two cases, one of the outcomes was inferior in the  
40 group receiving the new drug than in the comparison group) and actively controlled trials (considering  
41 only placebo-controlled trials). Subgroup analysis by tumour type was also attempted as exploratory  
42 analysis when a minimum number of two anticancer drugs within the same tumour type setting were  
43 observed. Outlier cases were not excluded from the analyses, but their impact was evaluated and  
44 reported when relevant as a separate analysis. All statistical analyses were performed using STATA  
45 (Statacorp, version 14.0)  
46  
47  
48  
49  
50  
51  
52  
53  
54  
55  
56  
57  
58  
59  
60

1  
2  
3  
4  
5  
6  
7  
8  
9  
10  
11  
12  
13  
14  
15  
16  
17  
18  
19  
20  
21  
22  
23  
24  
25  
26  
27  
28  
29  
30  
31  
32  
33  
34  
35  
36  
37  
38  
39  
40  
41  
42  
43  
44  
45  
46  
47  
48  
49  
50  
51  
52  
53  
54  
55  
56  
57  
58  
59  
60

*Patient and public involvement*

Patients have not been involved in the development of the research question or the design of this study. However, results of this analysis will be disseminated throughout public conferences, with statements summarizing our results, and with an open access to the published report posted in our institutional websites

For peer review only



## Results

From 2010 to mid-2016, 45 new anticancer drugs for 56 different oncology indications were approved via centralized procedures by the EMA. For 40 new anticancer drugs (47 indications), the basis for the approval was a pivotal trial adopting OS, PFS or ORR as a primary outcome; the price negotiation was completed by December 2016 for only 30 new anticancer drugs (35 indications) which are included in our analysis (Table 1). Seven drugs received orphan drug status by the EMA and two (vandetanib and crizotinib) received conditional approval. Of the 35 oncology indications tested in 35 different pivotal trials which were all controlled clinical trials, the commonest indications were melanoma (7 out of 35), followed by haematological cancer (6 out of 35) and non-small cell lung cancer (4 out of 35). In 15 such trials (43%), placebo was used as the control arm. Of the 35 indications, data on OS, PFS and ORR were available for 17, 29 and 29 indications respectively. Each drug-indication pair contributed to one or more of these analyses, depending on which outcomes were reported in the EPAR.

In the treatment groups, the median improvement in the OS and PFS were 11.4 weeks (IQR 8.8-17.2; min 13.2; max 23.5) and 12.8 weeks (IQR 6.4-17; min -7.48; max 58.8), respectively; median ORR improvement in the treatment group was 21.8% (IQR 10-34.6; min -3; max 63.3). The reported ranges have negative minimum values since in two cases - nivolumab for NSCLC and regorafenib for gastrointestinal stromal tumours - the experimental treatment had a negative effect on one of the outcomes compared to the control group (in terms of PFS for nivolumab and ORR for regorafenib). The median negotiated price for a 1-year treatment was 72,392 euros (IQR 53,819-85,800; min 4,942; max 142,785), which was further discounted by 25% (on average) after applying confidential rebates. For all anticancer drugs but ipilimumab the price was calculated as 1-year treatment since the posology reported in the Summary of Product Characteristics (SPC) reported that the treatment should

1  
2  
3 continue as long as clinical benefit is observed or until unacceptable toxicity occurs. In the case of  
4  
5 ipilimumab the price was calculated as a course of 4 doses as reported in the SPC.  
6  
7

8  
9 The official (ex-factory) price of new anticancer drugs and absolute clinical outcomes showed no  
10  
11 correlation (Figure 1a-c). The relationship between the improvement in median OS (in weeks) and  
12  
13 negotiated price was estimated for 16 drugs (17 indications), and no correlation was observed ( $R^2=$   
14  
15 0.067). When clinical outcomes were expressed as absolute advantage in median PFS or ORR, 25  
16  
17 drugs (29 indications) were available for analysis, and in these cases, no correlation was observed  
18  
19 ( $R^2= 0.004$  and  $0.006$ , respectively).  
20  
21

22  
23 Repeating the analyses and taking into account the additional confidential rebates, which are  
24  
25 compulsory for hospital procurement, no improvement in the benefit/price relationships was  
26  
27 highlighted (Figure 2a-c). These findings also remained unchanged when the analyses were repeated  
28  
29 with adjustments for tumour type (Supplementary Table 1) or when clinical outcome was expressed  
30  
31 as a percentage of improvement instead of as an absolute difference (Supplementary Figure 1a-c).  
32  
33 Sensitivity analyses that excluded negative improvements in outcomes over a control group  
34  
35 (Supplementary Figure 2) and considered only data from placebo controlled trials (Supplementary  
36  
37 Figure 3a,b) confirmed the main analysis. The exploratory subgroup analyses by tumour type did not  
38  
39 identify specific positive correlation patterns depending on tumour setting (Supplementary Figure 4  
40  
41  
42  
43  
44 a,b).  
45  
46  
47  
48  
49  
50  
51  
52  
53  
54  
55  
56  
57  
58  
59  
60

## Discussion

This study is the first attempt to evaluate whether there were better correlations between cancer drug prices and clinical outcomes in a setting where central price negotiations are mandatory for every new medicine. Our study gave unexpected results to the research question, highlighting no relationships between cost of cancer drugs and benefits. Moreover, all pre-specified sensitivity and subgroup analyses confirmed the main findings. This finding will have important policy implications both for countries like USA where price negotiations are absent and for other countries like Italy where price negotiations do exist.

In our study, the correlation between drug costs and clinical outcomes was even lower than the ones previously noted in the US context [13,14], showing that negotiations did not tilt the relationship between drug prices and benefit positively. Thus, higher drug pricing remains despite the Italian legislative environment, where approval based on cost-effectiveness analysis and price negotiations have been mandatory by law since 2001 [15,16]. This finding may cast doubts on the role of the negotiation itself. However, it is important to understand that countries like Italy that negotiate drug prices do such negotiations only for binary decisions of approval or no-approval, not taking into account, during negotiation, a clear correlation between prices and benefits. This understanding is important for cancer policy decisions.

Indeed, there is no legal policy in any country to negotiate prices differently for drugs approved on the basis of surrogate endpoints versus survival outcomes, or drugs that improve survival in days, versus those that improve survival in months or drugs with immature benefit risk profiles [18-22]. Although steps in the right direction, in lack of such policy, the value frameworks proposed by organizations such as ASCO, ESMO or NCCN have become little more than intellectual exercises [23-26].

1  
2  
3  
4  
5  
6 Another reason price negotiations did not achieve better price-value correlations is that because of  
7  
8 the global market of drugs, each single country - although large – only represents a small portion of  
9  
10 the consumer market. Thus, companies “wield the stick”, setting the maximum price that the market  
11  
12 will bear [27]. In addition, in Italy, no threshold for incremental cost-effectiveness ratio (ICER) has  
13  
14 been determined; thus, no limit is in place to be used as a decision rule in resource allocation at the  
15  
16 time of negotiation/reimbursement decisions. The lack of such kind of cut-off might have contributed  
17  
18 to the negative results in our study. However, we recognize that even when a threshold for ICER is  
19  
20 well established, such as in the UK [28], continuous exceptions have been allowed in the case of  
21  
22 anticancer drugs. For example, an ad hoc fund established in 2010 (i.e., the Cancer Drug Fund) was  
23  
24 recently dismissed by the Parliament because it did not deliver meaningful value to patients or society  
25  
26 [29].  
27  
28  
29  
30  
31

32 In the EU context (where newer anticancer drugs are approved by EMA without considering the  
33  
34 added-value or cost-effectiveness), the complexity further increases because once a marketing  
35  
36 authorization is granted, it may become difficult to manage the reimbursement issue at a national  
37  
38 level [30]. Moreover, it is also difficult for payers (NHS/insurance) to defend the thesis against the  
39  
40 public opinion that an anticancer drug cannot be reimbursed because it is too expensive [30, 31].  
41  
42 Indeed, as our study shows, the confidential discounts following negotiations between a member state  
43  
44 and a company do not ameliorate the correlation between treatment costs and benefits even though  
45  
46 they reduce absolute drug prices.  
47  
48  
49  
50

51 Another factor that negatively influences the contractual power of negotiation is non-transparent  
52  
53 information on drug prices across countries. Difficulties in retrieving full information on prices have  
54  
55 been already recognized in a recent survey comparing prices of anticancer drugs in 16 EU countries,  
56  
57  
58  
59  
60

1  
2  
3 Australia and New Zealand [32]. Vogler et al. found that price information is scarce and not disclosed  
4  
5 due to confidential discounts or MEAs, calling for higher transparency. The authors state that it is in  
6  
7 the interest of policy makers to remove clauses limiting disclosure on price information because they  
8  
9 risk overpaying when setting prices through external price referencing. This concern might be  
10  
11 relevant in the Italian context since the negotiation procedure for reimbursement takes into account  
12  
13 the price in other EU countries as well as the price of similar products within the same  
14  
15 pharmacotherapeutic group [33].  
16  
17

18  
19  
20 We believe that two partly independent approaches could be adopted by policy makers to achieve a  
21  
22 better balance between cancer drug prices and benefits. First, price negotiations should be more  
23  
24 strictly based on the level of evidence as well as the magnitudes of benefit. An ICER measure (such  
25  
26 as QALY) should represent a threshold for reimbursement, thus setting a starting point for price  
27  
28 negotiation and adjusting the ICER threshold based on the magnitude of the relative benefit reached.  
29  
30 If the information on the relative value is not available at the time of approval, comparisons can be  
31  
32 performed using indirect techniques, whereas after entering the market, payers should play a major  
33  
34 role in supporting the evidence generating process.  
35  
36  
37

38  
39 The second approach that could attain lower prices would require an increased transparency on the  
40  
41 costs of drug development process, including the relative contributions from academia and public  
42  
43 sector to the development of a drug [34-38]. For instance, research conducted to evaluate efforts of  
44  
45 drug development processes highlighted that about half of the most transformative drugs approved  
46  
47 by the FDA had substantial contributions to their development by academic researchers supported by  
48  
49 government funding [34,35]; in addition, it has been estimated that the cost of late clinical  
50  
51 development takes a limited part of the whole process [36]. It is probably the right time to  
52  
53 appropriately acknowledge the contributions of publicly funded research during drug price  
54  
55 negotiation with companies. Often, comparative effectiveness research is funded by public  
56  
57  
58  
59  
60

1  
2  
3 institutions to test different treatments in real practice on robust outcomes with longer follow up or  
4  
5 special populations [37,38]. The findings of these studies should be linked to a continuous price re-  
6  
7 negotiation over the life cycle of a product.  
8  
9

10 Other approaches identified as possible solutions to keep the health system sustainable address the  
11  
12 general governance of the system, i.e., when the price is already set. In fact, a price-volume approach  
13  
14 [39] or indication-based pricing [40,41] have been modelled, each presenting pros and cons.  
15  
16 Moreover, given that different oncology settings appear to be oligopolistic, thus refraining from price  
17  
18 competition, another possible solution comes from national/regional tenders among therapeutic  
19  
20 categories when more alternatives are available [42].  
21  
22  
23  
24

25 The main limitations of our study concern data completeness on clinical outcome and price. We used,  
26  
27 as an estimate of benefit, data from pivotal trials retrieved from EPARs. Moreover, we are not aware  
28  
29 if further (more robust) data became available at a later stage when the price was negotiated at the  
30  
31 national level. Thus, we cannot exclude that the correlation between drug prices and therapeutic  
32  
33 benefit might improve taking into account data acquired after the marketing of anticancer drugs.  
34  
35  
36

37 Another important limitation is that we have not considered quality of life outcomes as another metric  
38  
39 of clinical benefit. Furthermore, a recent study has shown that quality of life outcomes are not  
40  
41 routinely collected or published, and that the tools used to measure quality of life are varied to have  
42  
43 a uniform metric for comparison [43]. Although we have included surrogate measures such as PFS  
44  
45 or ORR as clinical outcomes in our analysis because they were considered as the basis for approval  
46  
47 by the regulatory agency, these surrogate measures do not always correlate with true clinical benefits  
48  
49 in terms of improved survival or improved quality of life [43,44]. Regarding the price estimate, we  
50  
51 estimated the treatment costs for 1-year treatment or for the total course in the case of ipilimumab  
52  
53  
54  
55  
56  
57  
58  
59  
60

1  
2  
3 where the treatment course lasts less than 1 year. However, the exclusion of ipilimumab would not  
4  
5 alter the main findings.  
6  
7

8  
9 Another factor that might have impacted the price estimation is the rebate obtained at the  
10  
11 regional/local level following drug tenders. This information was not available for the analyses and  
12  
13 would have been not generalizable at the national level. Moreover, additional savings were expected  
14  
15 “a posteriori” from the Managed Entry Agreements in place in Italy (whose information is not  
16  
17 publicly available) and were not considered in the analyses.  
18  
19

20  
21 Our study is a retrospective cross-sectional correlation study that aimed at evaluating whether central  
22  
23 price negotiation (mandatory by law in Italy) leads to better alignment of prices and the benefits  
24  
25 known at the time of drug approval. This means that our analysis is not aimed at comparing costs and  
26  
27 outcomes within drug classes, as a typical cost effective study, and we never intended to assess the  
28  
29 added values of the approved drugs in the context of all other drugs sharing the same indication. The  
30  
31 “population”/cohort approach that we adopted has the intrinsic limitation of including drugs approved  
32  
33 for different indications or different cancer types (with various incidence/prevalence) based on  
34  
35 different clinical data packages. The consequent heterogeneity stemming from this approach was  
36  
37 resolved adjusting the correlation analyses by tumour type or conducting several sub-analyses.  
38  
39 Following this approach, we found results consistent with primary findings thus confirming the  
40  
41 robustness of methods and results.  
42  
43  
44  
45

## 46 47 **Conclusion**

48  
49  
50 Our results suggest that price negotiations for approval decisions alone may not bring balance  
51  
52 between prices and benefits of anticancer drugs. Based on the limited outcome data available at the  
53  
54 time of reimbursement decisions (OS; PFS; ORR), prices of anticancer drugs do not reflect their  
55  
56 therapeutic benefit. Other strategies, such as value based price negotiations, price negotiations strictly  
57  
58  
59

1  
2  
3 based on strength of evidence and price transparencies may be necessary to better achieve the drug  
4 prices and benefits balance. These results need to be confirmed in other countries where a national  
5 price negotiation exists.  
6  
7  
8  
9  
10  
11  
12  
13  
14  
15  
16  
17  
18  
19  
20  
21  
22  
23  
24  
25  
26  
27  
28  
29  
30  
31  
32  
33  
34  
35  
36  
37  
38  
39  
40  
41  
42  
43  
44  
45  
46  
47  
48  
49  
50  
51  
52  
53  
54  
55  
56  
57  
58  
59  
60

For peer review only



## Contributorship statement

FT, NM and AA conceptualized the study; FT, AA, NM, FM, FBA, GT, and RDC designed the study; FBA, RP, IE and NM were in charge of data extraction and quality control; FM, RDC, and FT performed the data analysis; FT, RDC, FM, GT, BG, FP and AA drafted the manuscript; all the authors contributed to the discussion and the interpretation of results, and reviewed the final version of the manuscript. All authors approved the final manuscript as submitted.

## Competing interests

The authors have no competing of interest relevant to this article to disclose and all authors works for public Universities, Public Institutions or not for profit Organizations.

## Funding

None.

## Data Availability

All data presented in the analysis have been extracted by public documents (EPARs for each drug outcomes and clinical data; regional and national administrative official documents (i.e. Gazzetta Ufficiale for prices). Data are available upon reasonable request

1  
2  
3  
4  
5  
6  
7  
8  
9  
10  
11  
12  
13  
14  
15  
16  
17  
18  
19  
20  
21  
22  
23  
24  
25  
26  
27  
28  
29  
30  
31  
32  
33  
34  
35  
36  
37  
38  
39  
40  
41  
42  
43  
44  
45  
46  
47  
48  
49  
50  
51  
52  
53  
54  
55  
56  
57  
58  
59  
60

## References:

- 1) Quintiles IMS Institute. Outlook for Global Medicines through 2021. December 2016. 1-54.  
[http://www.imshealth.com/en/thought-leadership/quintilesims-institute/reports/outlook\\_for\\_global\\_medicines\\_through\\_2021](http://www.imshealth.com/en/thought-leadership/quintilesims-institute/reports/outlook_for_global_medicines_through_2021)
- 2) Ghinea N, Lipworth W, Kerridge I. Propaganda or the cost of innovation? Challenging the high price of new drugs. *BMJ*. 2016; 352: i1284, doi: 10.1136/bmj.i1284.
- 3) European Commission - Press release. Antitrust: Commission opens formal investigation into Aspen Pharma's pricing practices for cancer medicines. Brussels, 15 May 2017.  
[http://europa.eu/rapid/press-release\\_IP-17-1323\\_en.htm](http://europa.eu/rapid/press-release_IP-17-1323_en.htm)
- 4) Gordon N, Stemmer SM, Greenberg D, et al. Trajectories of Injectable Cancer Drug Costs After Launch in the United States. *J Clin Oncol*. 2018; 36: 319-325.
- 5) Narang AK, Nicholas LH. Out-of-Pocket Spending and Financial Burden Among Medicare Beneficiaries With Cancer. *JAMA Oncol*. 2017; 3:757-765.
- 6) Shankaran V, Ramsey S. Addressing the Financial Burden of Cancer Treatment: From Copay to Can't Pay. *JAMA Oncol*. 2015; 1:273-4.
- 7) Liz Szabo. Cancer patients skipping medicines or delaying treatment due to high drug prices. *STAT* 15 March, 2017. <https://www.statnews.com/2017/03/15/cancer-patients-drug-prices/>
- 8) de Souza JA, Conti RM. Mitigating Financial Toxicity Among US Patients With Cancer. *JAMA Oncol*. 2017; 3: 765-766.
- 9) Kesselheim AS, Avorn J, Sarpatwari A. The High Cost of Prescription Drugs in the United States: Origins and Prospects for Reform. *JAMA*. 2016; 316: 858-71.
- 10) Hwang TJ, Kesselheim AS, Sarpatwari A. Value-Based Pricing and State Reform of Prescription Drug Costs. *JAMA*. 2017; 318: 609-610,

- 1  
2  
3 11) Fralick M, Avorn J, Kesselheim AS. The Price of Crossing the Border for Medications. N  
4  
5 Engl J Med. 2017; 377: 311-313.  
6  
7  
8 12) Tay-Teo K1, Ilbawi A, Hill SR. Comparison of Sales Income and Research and  
9  
10 Development Costs for FDA-Approved Cancer Drugs Sold by Originator Drug Companies.  
11  
12 JAMA Netw Open. 2(1):e186875, 2019. doi: 10.1001/jamanetworkopen.2018.6875.  
13  
14  
15 13) Mailankody S, Prasad V. Five Years of Cancer Drug Approvals: Innovation, Efficacy, and  
16  
17 Costs. JAMA Oncol. 2015; 1: 539-40, Erratum in: JAMA Oncol. 2015; 1: 544.  
18  
19  
20 14) Vivot A, Jacot J, Zeitoun JD, et al. Clinical benefit, price and approval characteristics of  
21  
22 FDA-approved new drugs for treating advanced solid cancer, 2000-2015. Ann Oncol. 2017;  
23  
24 28:1111-1116.  
25  
26  
27 15) Comitato Interministeriale per la Programmazione Economica. Individuazione dei criteri per  
28  
29 la contrattazione del prezzo dei farmaci (Deliberazione n.3/2001). Official Gazette of the  
30  
31 Italian Republic. N. 73 del 28-03-2001.  
32  
33 <http://www.gazzettaufficiale.it/eli/id/2001/03/28/001A3188/sg>  
34  
35  
36 16) Italian Parliament. Legge 24 novembre 2003, n. 326. Conversione in legge, con  
37  
38 modificazioni, del decreto-legge 30 settembre 2003, n. 269, recante disposizioni urgenti per  
39  
40 favorire lo sviluppo e per la correzione dell'andamento dei conti pubblici. Official Gazette of  
41  
42 the Italian Republic. N. 274; 25 November 2003.  
43  
44 <http://www.parlamento.it/parlam/leggi/03326l.htm>  
45  
46  
47 17) Italian Parliament . Legge 27 December 2006, n. 296. Art. 1 comma 796, lettera g).  
48  
49 Disposizioni per la formazione del bilancio annuale e pluriennale dello Stato (finanziaria  
50  
51 2007). Official Gazette of the Italian Republic. N. 299; 27 December 2006, Suppl ord. n.  
52  
53 244.  
54  
55  
56  
57  
58  
59  
60

- 1  
2  
3 18) Apolone G, Joppi R, Bertelè V, et al. Ten years of marketing approvals of anticancer drugs  
4  
5 in Europe: regulatory policy and guidance documents need to find a balance between  
6  
7 different pressures. *Br J Cancer*. 2005; 93: 504-9.  
8  
9  
10 19) Bertele' V, Banzi R, Capasso F, et al. Haematological anticancer drugs in Europe: any added  
11  
12 value at the time of approval? *Eur J Clin Pharmacol*. 2007; 63: 713-9.  
13  
14 20) Trotta F, Apolone G, Garattini S, et al. Stopping a trial early in oncology: for patients or for  
15  
16 industry? *Ann Oncol*. 2008; 19: 1347-53. doi: 10.1093/annonc/mdn042. Epub 2008 Feb 27  
17  
18  
19 21) Kim C, Prasad V. Cancer Drugs Approved on the Basis of a Surrogate End Point and  
20  
21 Subsequent Overall Survival: An Analysis of 5 Years of US Food and Drug Administration  
22  
23 Approvals. *JAMA Intern Med*. 2015; 175: 1992-4.  
24  
25  
26 22) Banzi R, Gerardi C, Bertele' V, et al. Approvals of drugs with uncertain benefit-risk profiles  
27  
28 in Europe. *Eur J Intern Med*. 2015; 26: 572-84.  
29  
30  
31 23) Salas-Vega S, Iliopoulos O, Mossialos E. Assessment of Overall Survival, Quality of Life,  
32  
33 and Safety Benefits Associated with New Cancer Medicines. *JAMA Oncol*. 2017; 3:382-  
34  
35 390.  
36  
37  
38 24) Wise PH. Cancer drugs, survival, and ethics. *BMJ* 2016; 355: i5792  
39  
40 <https://doi.org/10.1136/bmj.i5792> (Published 09 November 2016)  
41  
42  
43 25) Del Paggio JC, Sullivan R, Schrag D, et al. Delivery of meaningful cancer care: a  
44  
45 retrospective cohort study assessing cost and benefit with the ASCO and ESMO  
46  
47 frameworks. *Lancet Oncol*. 2017; 18: 887-894.  
48  
49  
50 26) Sobrero A1, Bruzzi P. Incremental advance or seismic shift? The need to raise the bar of  
51  
52 efficacy for drug approval. *J Clin Oncol*. 2009; 27:5868-73.  
53  
54  
55 27) Ramsey SD, Lyman GH, Bangs R. Addressing Skyrocketing Cancer Drug Prices Comes  
56  
57 with Trade-offs: Pick Your Poison. *JAMA Oncol*. 2016; 2: 425-6.  
58  
59  
60

- 1  
2  
3 28) Dillon A. Carrying NICE over the threshold. NICE. 19 February 2015.  
4  
5 <https://www.nice.org.uk/news/blog/carrying-nice-over-the-threshold>  
6  
7  
8 29) Aggarwal A, Fojo T, Chamberlain C, et al. Do patient access schemes for high-cost cancer  
9  
10 drugs deliver value to society? -lessons from the NHS Cancer Drugs Fund. *Ann Oncol*.  
11  
12 2017; 28: 1738–1750. doi: 10.1093/annonc/mdx110  
13  
14 30) Cohen D. Cancer drugs: high price, uncertain value. *BMJ*. 2017; 359: j4543.  
15  
16 31) Prasad V. Do cancer drugs improve survival or quality of life? *BMJ*. 2017; 359: j4528  
17  
18 32) Vogler S, Vitry A, Babar ZU. Cancer drugs in 16 European countries, Australia, and New  
19  
20 Zealand: a cross-country price comparison study. *Lancet Oncol*. 2016; 17: 39-47,  
21  
22  
23 33) Folino-Gallo P, Montilla S, Bruzzone M, et al. Pricing and reimbursement of  
24  
25 pharmaceuticals in Italy. *Eur J Health Econ*. 2008; 9:305-10.  
26  
27 34) Stevens AJ, Jensen JJ, Wyller K, et al. The role of public-sector research in the discovery of  
28  
29 drugs and vaccines. *N Engl J Med*. 2011; 364: 535-41.  
30  
31 35) Kesselheim AS, Tan YT, Avorn J. The roles of academia, rare diseases, and repurposing in  
32  
33 the development of the most transformative drugs. *Health Aff (Millwood)*. 2015; 34: 286-  
34  
35 93.  
36  
37 36) Martin L, Hutchens M, Hawkins C, et al. How much do clinical trials cost? *Nat Rev Drug*  
38  
39 *Discov*. 2017; 16: 381-382.  
40  
41 37) Italian Medicines Agency (AIFA) Research & Development Working Group. Feasibility  
42  
43 and challenges of independent research on drugs: the Italian medicines agency (AIFA)  
44  
45 experience. *Eur J Clin Invest*. 2010; 40: 69-86.  
46  
47 38) Traversa G, Masiero L, Sagliocca L, et al. Italian program for independent research on  
48  
49 drugs: 10-year follow-up of funded studies in the area of rare diseases. *Orphanet J Rare Dis*.  
50  
51 2016; 11: 36.  
52  
53  
54  
55  
56  
57  
58  
59  
60

- 1  
2  
3 39) Messori A. Application of the Price-Volume Approach in Cases of Innovative Drugs Where  
4 Value-Based Pricing is Inadequate: Description of Real Experiences in Italy. *Clin Drug*  
5 *Investig.* 2016; 36: 599-603.  
6  
7  
8  
9  
10 40) Bach PB. Indication-specific pricing for cancer drugs. *JAMA.* 2014; 312:1629-30.  
11  
12 41) Chandra A, Garthwaite C. The Economics of Indication-Based Drug Pricing. *N Engl J Med.*  
13 2017; 377:103-106..  
14  
15  
16 42) Kantarjian H, Rajkumar SV. Why are cancer drugs so expensive in the United States, and  
17 what are the solutions? *Mayo Clin Proc.* 2015; 90:500-4..  
18  
19  
20 43) Hwang TJ, Gyawali B. Association between progression-free survival and patients' quality  
21 of life in cancer clinical trials. *Int J Cancer.* 2019; 144:1746-1751. doi: 10.1002/ijc.31957.  
22  
23  
24 44) Prasad V, Kim C, Burotto M, Vandross A. The Strength of Association Between Surrogate  
25 End Points and Survival in Oncology: A Systematic Review of Trial-Level Meta-analyses.  
26 *JAMA Intern Med.* 2015; 175:1389-98. doi: 10.1001/jamainternmed.2015.2829.  
27  
28  
29  
30  
31  
32  
33  
34  
35  
36  
37  
38  
39  
40  
41  
42  
43  
44  
45  
46  
47  
48  
49  
50  
51  
52  
53  
54  
55  
56  
57  
58  
59  
60

1  
2  
3  
4  
5  
6  
7  
8  
9  
10  
11  
12  
13  
14  
15  
16  
17  
18  
19  
20  
21  
22  
23  
24  
25  
26  
27  
28  
29  
30  
31  
32  
33  
34  
35  
36  
37  
38  
39  
40  
41  
42  
43  
44  
45  
46  
47  
48  
49  
50  
51  
52  
53  
54  
55  
56  
57  
58  
59  
60

For peer review only

**Table 1.** Characteristics of the 30 anticancer drugs included in the analysis.

| Medicine Name | Active Substance               | Clinical setting                                                                                               | Treatment group                                                                         | Control group                                                               | PFS TRT (median in weeks) | PFS CRT (median in weeks) | OS TRT (median in weeks) | OS CRT (median in weeks) | ORR TRT (%) | ORR CRT (%) | Year First Auth. | Official negot. price (€) | Disc. price (€) |
|---------------|--------------------------------|----------------------------------------------------------------------------------------------------------------|-----------------------------------------------------------------------------------------|-----------------------------------------------------------------------------|---------------------------|---------------------------|--------------------------|--------------------------|-------------|-------------|------------------|---------------------------|-----------------|
| Teysuno       | tegafur / gimeracil / oteracil | advanced gastric cancer in combination with cisplatin.                                                         | teysuno 25 mg/m + cisplatin 75 mg/m <sup>2</sup>                                        | 5-fluorouracil 1000 mg/m <sup>2</sup> /24 + cisplatin 100 mg/m <sup>2</sup> |                           |                           | 34.4                     | 31.6                     |             |             | 2011             | 4942                      | 3479            |
| Jevtana       | cabazitaxel                    | hormone-refractory metastatic prostate cancer .                                                                | cabazitaxel + prednisone                                                                | mitoxantrone + prednisone                                                   | 11.2                      | 5.6                       | 60.4                     | 50.8                     | 14.4        | 4.4         | 2011             | 52983                     | 38254           |
| Yervoy        | ipilimumab                     | advanced (unresectable or metastatic) melanoma                                                                 | ipilimumab + placebo                                                                    | peptide vaccine glycoprotein 100 (gp100)                                    | 11.04                     | 11.04                     | 39.8                     | 25.8                     | 5.7         | 1.5         | 2011             | 71400                     | 45107           |
| Votubia       | everolimus                     | Renal angiomyolipoma associated with tuberous sclerosis complex (TSC)                                          | everolimus                                                                              | placebo                                                                     |                           | 45.48                     |                          |                          | 41.8        | 0           | 2011             | 66521                     | 41424           |
| Votubia       | everolimus                     | Subependymal giant cell astrocytoma (SEGA) associated with tuberous sclerosis complex (TSC)                    | everolimus                                                                              | placebo                                                                     |                           |                           |                          |                          | 34.6        | 0           |                  | 53216                     | 33139           |
| Halaven       | eribulin                       | locally advanced or metastatic breast cancer                                                                   | eribulin 1.23 mg/m <sup>2</sup> (equivalent to 1.4 mg/m <sup>2</sup> eribulin mesylate) | treatment of physician's choice                                             | 16.14                     | 9.71                      | 57.57                    | 45.86                    | 12.2        | 4.7         | 2011             | 32300                     | 28130           |
| Zytiga        | abiraterone acetate            | metastatic castration-resistant prostate cancer                                                                | abiraterone acetate                                                                     | placebo                                                                     | 22.4                      | 14.4                      | 68.9                     | 48.7                     | 29.1        | 5.5         | 2011             | 46842                     | 33397           |
| Dacogen       | decitabine                     | newly diagnosed de novo or secondary acute myeloid leukaemia (AML)                                             | decitabine                                                                              | patient's choice                                                            | 14.8                      | 8.4                       | 30.8                     | 20                       |             |             | 2012             | 54366                     | 34346           |
| Caprelsa      | vandetanib                     | aggressive and symptomatic medullary thyroid cancer (MTC) unresectable locally advanced or metastatic disease. | vandetanib                                                                              | placebo                                                                     | 122                       | 77.2                      |                          |                          | 45          | 13          | 2012             | 67405                     | 53533           |
| Zelboraf      | vemurafenib                    | BRAF-V600-mutation-positive unresectable or metastatic melanoma.                                               | vemurafenib                                                                             | dacarbazine                                                                 | 21.28                     | 6.44                      | 52.8                     | 39.6                     | 48.4        | 5.5         | 2012             | 119929                    | 108236          |
| Xalkori       | crizotinib                     | anaplastic lymphoma kinase (ALK) positive advanced non-small cell lung cancer (NSCLC).                         | crizotinib                                                                              | pemetrexed or docetaxel                                                     | 30.8                      | 12                        |                          |                          | 65.3        | 19.5        | 2012             | 79538                     | 57427           |



|           |                       |                                                                                                                                                       |                                      |                                                                     |       |      |       |       |      |      |      |        |        |
|-----------|-----------------------|-------------------------------------------------------------------------------------------------------------------------------------------------------|--------------------------------------|---------------------------------------------------------------------|-------|------|-------|-------|------|------|------|--------|--------|
| Xalkori   | crizotinib            | first-line treatment of adults with anaplastic lymphoma kinase (ALK) positive advanced non-small cell lung cancer (NSCLC).                            | crizotinib                           | chemotherapy                                                        | 43.6  | 28   |       |       | 74.4 | 45   |      | 79538  | 57427  |
| Inlyta    | axitinib              | advanced renal-cell carcinoma (RCC)                                                                                                                   | axitinib                             | sorafenib                                                           | 26.8  | 18.8 |       |       | 19.4 | 9.4  | 2012 | 57632  | 39295  |
| Perjeta   | pertuzumab            | HER2-positive metastatic or locally recurrent unresectable breast cancer                                                                              | pertuzumab + trastuzumab + docetaxel | placebo + trastuzumab + docetaxel                                   | 74    | 49.6 |       |       | 80.2 | 69.3 | 2013 | 51643  | 46608  |
| Kadcyla   | trastuzumab emtansine | HER2-positive, unresectable locally advanced or metastatic breast cancer                                                                              | trastuzumab emtansine (tdm1)         | lapatinib + capecitabine (lap+cap)                                  | 38.4  | 25.6 | 123.9 | 100.4 |      |      | 2013 | 87215  | 75877  |
| Giotrif   | afatinib              | locally advanced or metastatic non-small cell lung cancer (NSCLC) with activating EGFR mutation(s);                                                   | afatinib (film-coated tablets)       | pemetrexed (lyophilised powder) + cisplatin (solution for infusion) | 44.56 | 27.6 |       |       | 56.1 | 22.6 | 2013 | 29528  | 21853  |
| Stivarga  | regorafenib           | metastatic colorectal cancer (CRC)                                                                                                                    | regorafenib + best supportive care   | placebo + best supportive care                                      | 8.4   | 7.4  | 28    | 21.6  | 1    | 0.4  | 2013 | 85800  | 77434  |
| Stivarga  | regorafenib           | unresectable or metastatic gastrointestinal stromal tumors (GIST)                                                                                     | regorafenib + best supportive care   | placebo + best supportive care                                      | 21    | 4    |       |       | 1.5  | 4.5  |      | 85800  | 77434  |
| Tafinlar  | dabrafenib            | unresectable or metastatic melanoma with a BRAF V600 mutation.                                                                                        | dabrafenib                           | dacarbazine                                                         | 27.6  | 10.8 | 72.8  | 62.4  | 59   | 24   | 2013 | 107935 | 87670  |
| Zaltrap   | aflibercept           | metastatic colorectal cancer (MCRC)                                                                                                                   | aflibercept+folfiri                  | placebo+folfiri                                                     | 27.6  | 18.7 | 54    | 48.4  | 19.8 | 11.1 | 2013 | 30576  | 27591  |
| Xtandi    | enzalutamide          | metastatic castration resistant prostate cancer                                                                                                       | enzalutamide (mdv3100)               | placebo                                                             | 33.2  | 11.6 | 74.4  | 54.4  |      |      | 2013 | 49184  | 31960  |
| Imnovid   | pomalidomide          | relapsed and refractory multiple myeloma                                                                                                              | pom+ld-dex                           | hd-dex                                                              | 15.7  | 8    |       | 34    |      |      | 2013 | 127985 | 101646 |
| Lynparza* | olaparib              | platinum-sensitive relapsed BRCA-mutated (germline and/or somatic) high grade serous epithelial ovarian, fallopian tube, or primary peritoneal cancer | olaparib                             | placebo                                                             | 33.6  | 19.2 | 119.2 | 111.2 |      |      | 2014 | 70517  | 52142  |
| Cyramza   | ramucirumab           | advanced gastric cancer or gastro-oesophageal junction adenocarcinoma with disease progression                                                        | ramucirumab+ paclitaxel              | placebo+paclitaxel                                                  | 17.6  | 11.6 | 38.4  | 29.6  | 27.9 | 16.1 | 2014 | 87360  | 78842  |
| Mekinist  | trametinib            | unresectable or metastatic melanoma with a BRAF V600 mutation.                                                                                        | trametinib                           | chemotherapy (dtic or paclitaxel)                                   | 19.6  | 6    | 62.4  | 45.2  | 19   | 5    | 2014 | 62398  | 28157  |

|    |           |                          |                                                                                                                                                                |                                            |                                   |       |  |  |      |      |      |      |      |      |       |                |
|----|-----------|--------------------------|----------------------------------------------------------------------------------------------------------------------------------------------------------------|--------------------------------------------|-----------------------------------|-------|--|--|------|------|------|------|------|------|-------|----------------|
| 1  | Imbruvica | ibrutinib                | chronic lymphocytic leukaemia (CLL)                                                                                                                            | ibrutinib                                  | chlorambucil                      |       |  |  | 75.6 |      |      | 82.4 | 35.3 |      | 73805 | 51663          |
| 2  | Zydelig   | idelalisib               | chronic lymphocytic leukaemia (CLL)                                                                                                                            | idelalisib + rituximab                     | placebo + rituximab               |       |  |  | 22   |      |      | 74.5 | 14.5 | 2014 | 48667 | 34067          |
| 3  | Sylvant   | siltuximab               | multicentric Castlemans disease                                                                                                                                | siltuximab + best supportive care          | placebo + best supportive care    |       |  |  |      |      |      | 37.7 | 3.8  | 2014 | 66104 | 29829          |
| 4  | Keytruda  | pembrolizumab            | advanced(unresectable or metastatic) melanoma                                                                                                                  | ipilimumab                                 | pembrolizumab                     | 22    |  |  | 11.2 |      |      | 33.7 | 11.9 | 2015 | 90400 | 81586          |
| 5  | Opdivo    | nivolumab                | advanced (unresectable or metastatic) melanoma                                                                                                                 | nivolumab 3 mg/kg                          | dacarbazine                       | 18.8  |  |  | 16.8 |      |      | 31.7 | 10.6 | 2015 | 81310 | 71181          |
| 6  | Opdivo    | nivolumab                | locally advanced or metastatic non-small cell lung cancer (NSCLC)                                                                                              | nivolumab 3 mg/kg                          | docetaxel 75 mg/m2                | 9.32  |  |  | 16.8 | 48.8 | 37.4 | 19.2 | 12.4 |      | 81310 | 71181          |
| 7  | Opdivo    | nivolumab                | advanced renal cell carcinoma                                                                                                                                  | nivolumab 3 mg/kg                          | everolimus100mg                   | 18.4  |  |  | 17.8 | 100  | 78.2 | 25.1 | 5.4  |      | 81310 | in negotiation |
| 8  | Lenvima   | lenvatinib mesylate      | progressive, locally advanced or metastatic, differentiated (papillary/follicular/Hrthle cell) thyroid carcinoma (DTC), refractory to radioactive iodine (RAI) | lenvatinib                                 | placebo                           | 73.2  |  |  | 14.4 |      |      | 64.8 | 1.5  | 2015 | 68433 | 58673          |
| 9  | Cotellic  | cobimetinib hemifumarate | unresectable or metastatic melanoma with a BRAF V600 mutation                                                                                                  | cobimetinib+vemurafenib                    | placebo+vemurafenib               | 45.2  |  |  | 24   |      |      | 67.8 | 44.8 | 2015 | 75374 | 54420          |
| 10 | Kyprolis  | carfilzomib              | multiple myeloma who have received at least one prior therapy.                                                                                                 | carfilzomib + lenalidomide + dexamethasone | lenalidomide + dexamethasone (rd) | 105.2 |  |  | 70.4 |      |      | 87.1 | 67.7 | 2015 | 75900 | 44525          |

Progression Free Survival (PFS); Overall Survival (OS); Treatment Group (TRT); Control Group (CTR); Objective Response Rate (ORR); Official Negotiated Prices (Official Negot.); Discounted Prices (Disc. Prices).

\*: During the evaluation at the EMA, lymparza was found to be more effective in a subgroup of patients with a specific biomarker with the following outcome results: PFS lymparza: 44,8 w; PFS control: 17,2 w; OS lymparza: 139,6 w; OS control: 127,6.

1  
2  
3  
4  
5  
6  
7  
8  
9  
10  
11  
12  
13  
14  
15  
16  
17  
18  
19  
20  
21  
22  
23  
24  
25  
26  
27  
28  
29  
30  
31  
32  
33  
34  
35  
36  
37  
38  
39  
40  
41  
42  
43  
44  
45  
46

For peer review only

1  
2  
3  
4  
5  
6  
7  
8  
9  
10  
11  
12  
13  
14  
15  
16  
17  
18  
19  
20  
21  
22  
23  
24  
25  
26  
27  
28  
29  
30  
31  
32  
33  
34  
35  
36  
37  
38  
39  
40  
41  
42  
43  
44  
45  
46  
47  
48  
49  
50  
51  
52  
53  
54  
55  
56  
57  
58  
59  
60

## Figure, tables, titles and legends

### Figure 1. Correlation between anticancer drug prices (officially negotiated) and health benefits

*Figure 1a. Official negotiated price (ex-factory) vs difference in median OS (16 drugs are included in the analysis: 15 with a single indication and one with two indications)*

*Figure 1b. Official negotiated price (ex-factory) vs difference in median PFS (25 drugs are included in the analysis: 22 with a single indication, two with two indications and one with three indication)*

*Figure 1c. Official negotiated price (ex-factory) vs proportion of ORR (24 drugs are included in the analysis: 20 with a single indication, three with two indications and one with three indications)*

Legend: Progression Free Survival (PFS); Overall Survival (OS); Objective Response Rate (ORR);

### Figure 2. Correlation between anticancer drug prices (discounted) and health benefits

*Figure 2a. Discounted price with additional compulsory rebates vs difference in median OS (16 drugs related to a single indication are included in the analysis)*

*Figure 2b. Discounted price with additional compulsory rebates vs difference in median PFS (25 drugs are included in the analysis: 22 with a single indication and three with two indications)*

*Figure 2c. Discounted price with additional compulsory rebates vs proportion of ORR (24 drugs are included in the analysis: 20 with a single indication and four with two indications)*

Legend: Progression Free Survival (PFS); Overall Survival (OS); Objective Response Rate (ORR);

### Table 1. Characteristics of the 30 anticancer drugs included in the analysis.

Legend:

Progression Free Survival (PFS); Overall Survival (OS); Treatment Group (TRT); Control Group (CTR); Objective Response Rate (ORR); Official Negotiated Prices (Official Negot.); Discounted Prices (Disc. Prices).

\*: During the evaluation at the EMA, lymparza was found to be more effective in a subgroup of patients with a specific biomarker with the following outcome results: PFS lymparza: 44,8 w; PFS control: 17,2 w; OS lymparza: 139,6 w; OS control: 127,6.

### Supplementary Table 1. Details of the statistical analysis conducted

### Supplementary Figures 1-4. Correlations in the sensitivity analysis conducted

*Supplementary Figure 1a. Official negotiated price (ex-factory) vs percentage improvement in median Overall Survival (OS) (16 drugs are included in the analysis: 15 with a single indication and one with two indications)*

*Supplementary Figure 1b. Official negotiated price (ex-factory) vs percentage improvement in median Progression Free Survival (PFS) (25 drugs are included in the analysis: 22 with a single indication, two with two indications and one with three indication)*

1  
2  
3 *Supplementary Figure 1c. Official negotiated price (ex-factory) vs percentage improvement in*  
4 *proportion of Objective Response Rate (ORR) (24 drugs are included in the analysis: 20 with a*  
5 *single indication, three with two indications and one with three indications)*  
6

7  
8 *Figure 2. Official negotiated price (ex-factory) vs median Progression Free Survival (PFS),*  
9 *excluding negative outcome data (25 drugs are included in the analysis: 22 with a single indication*  
10 *and three with two indications)*  
11

12 *Supplementary Figure 3a. Official negotiated price (ex-factory) vs median Overall Survival (OS),*  
13 *considering only data from placebo-controlled trials. (7 drugs related to a single indication are*  
14 *included in the analysis)*  
15

16 *Supplementary Figure 3b. Official negotiated price (ex-factory) vs median Progression Free*  
17 *Survival (PFS), considering only data from placebo-controlled trials. (11 drugs are included in the*  
18 *analysis: 10 with a single indication and one with 2 indications)*  
19

20  
21 *Supplementary Figure 4a. Official negotiated price (ex-factory) vs median Progression Free*  
22 *Survival (PFS), stratified by type of cancer (at least 2 indications for each cancer type). (24 drugs*  
23 *are included in the analysis: 21 with a single indication, two with two indications and one with three*  
24 *indication)*  
25

26 *Supplementary Figure 4b. Discounted price with additional compulsory rebates vs median*  
27 *Progression Free Survival (PFS), stratified by type of cancer (at least 2 indications for each cancer*  
28 *type). (24 drugs are included in the analysis: 21 with a single indication and three with 2*  
29 *indications)*  
30  
31

32 Legend: Progression Free Survival (PFS); Overall Survival (OS); Objective Response Rate (ORR);  
33  
34  
35  
36  
37  
38  
39  
40  
41  
42  
43  
44  
45  
46  
47  
48  
49  
50  
51  
52  
53  
54  
55  
56  
57  
58  
59  
60



45 Figure 1. Correlation between anticancer drug prices (officially negotiated) and health benefits

46 180x219mm (300 x 300 DPI)

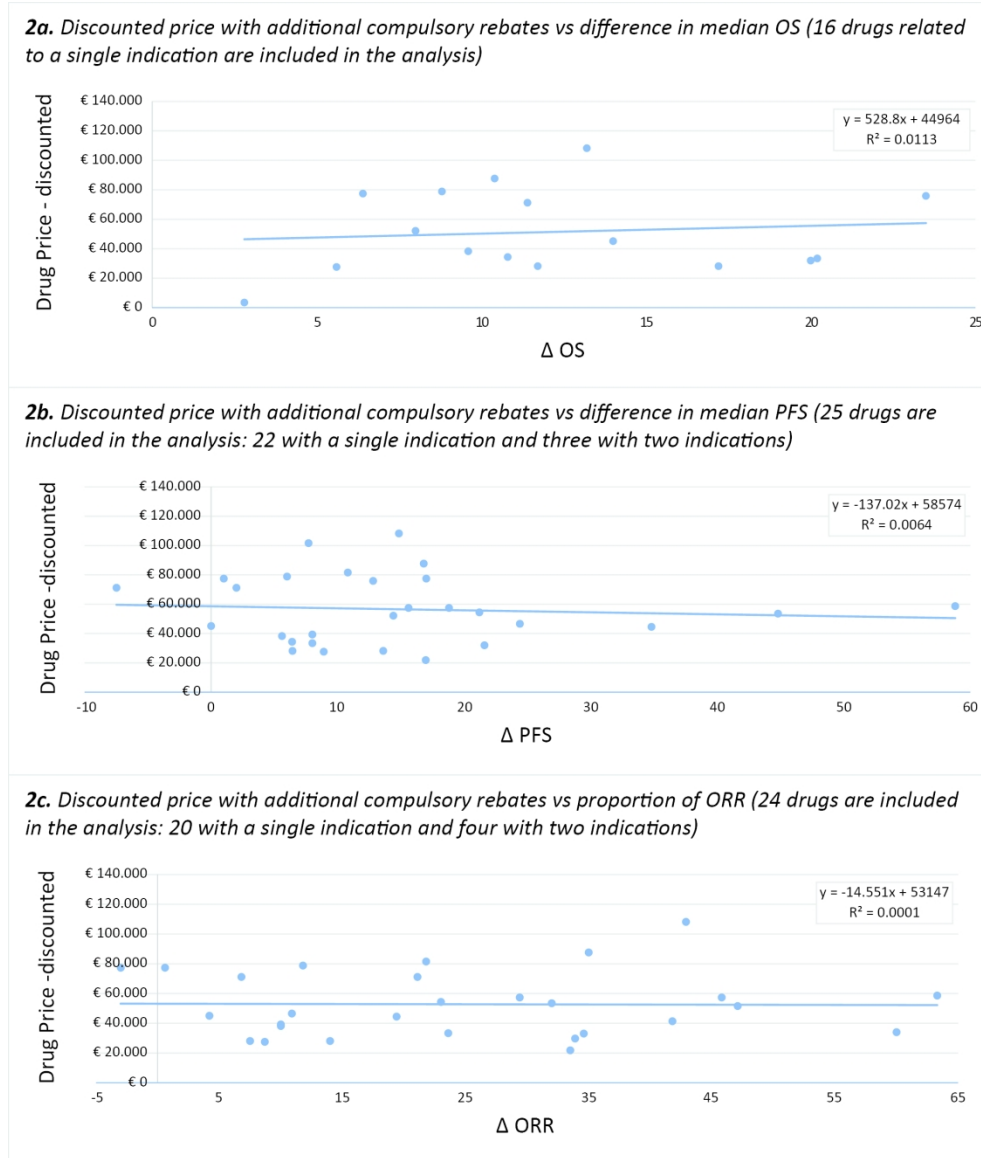

Progression Free Survival (PFS); Overall Survival (OS); Objective Response Rate (ORR)

Figure 2. Correlation between anticancer drug prices (discounted) and health benefits

180x219mm (300 x 300 DPI)

**Supplementary Table 1.** Details of the statistical analysis conducted

| Dependent variable        | Independent variable 1 | Independent variable 2 | Number of drugs involved in the analysis | Type of linear regression | Intercept | Coefficient of the Independent variable 1 | p value of the Independent variable 1 | Correlation coefficient: r | Coefficient of Determination: R <sup>2</sup> |
|---------------------------|------------------------|------------------------|------------------------------------------|---------------------------|-----------|-------------------------------------------|---------------------------------------|----------------------------|----------------------------------------------|
| Official negotiated price | Δ OS                   |                        | 17                                       | simple                    | 50332.71  | 1256.724                                  | 0.315                                 | 0.259                      | 0.067                                        |
| Discounted price          | Δ OS                   |                        | 16                                       | simple                    | 44963.88  | 528.800                                   | 0.695                                 | 0.11                       | 0.0113                                       |
| Official negotiated price | Δ OS                   | tumor type             | 17                                       | multiple                  | 57765.99  | 2065.264                                  | 0.433                                 |                            | 0.412                                        |
| Discounted price          | Δ OS                   | tumor type             | 16                                       | multiple                  | 55312.8   | 1391.947                                  | 0.614                                 |                            | 0.257                                        |
| Official negotiated price | % Δ OS                 |                        | 17                                       | simple                    | 56230.04  | 349.505                                   | 0.524                                 | 0.166                      | 0.027                                        |
| Discounted price          | % Δ OS                 |                        | 16                                       | simple                    | 50127.28  | 42.986                                    | 0.937                                 | 0.022                      | 0.0005                                       |
| Official negotiated price | % Δ OS                 | tumor type             | 17                                       | multiple                  | 72407.98  | 292.048                                   | 0.766                                 |                            | 0.362                                        |
| Discounted price          | % Δ OS                 | tumor type             | 16                                       | multiple                  | 68456.17  | 89.3936                                   | 0.930                                 |                            | 0.2286                                       |
| Official negotiated price | Δ PFS                  |                        | 29                                       | simple                    | 73741.11  | -113.515                                  | 0.738                                 | -0.065                     | 0.004                                        |
| Discounted price          | Δ PFS                  |                        | 28                                       | simple                    | 58574.12  | -137.018                                  | 0.687                                 | -0.080                     | 0.006                                        |
| Official negotiated price | Δ PFS                  | tumor type             | 29                                       | multiple                  | 70454.93  | -271.324                                  | 0.635                                 |                            | 0.338                                        |
| Discounted price          | Δ PFS                  | tumor type             | 28                                       | multiple                  | 56293.38  | -393.926                                  | 0.508                                 |                            | 0.283                                        |
| Official negotiated price | % Δ PFS                |                        | 29                                       | simple                    | 68763.32  | 33.7994                                   | 0.427                                 | 0.153                      | 0.024                                        |
| Discounted price          | % Δ PFS                |                        | 28                                       | simple                    | 52823.84  | 36.2925                                   | 0.392                                 | 0.169                      | 0.028                                        |
| Official negotiated price | % Δ PFS                | tumor type             | 29                                       | multiple                  | 66564.96  | 15.935                                    | 0.765                                 |                            | 0.333                                        |
| Discounted price          | % Δ PFS                | tumor type             | 28                                       | multiple                  | 51337.49  | 11.068                                    | 0.842                                 |                            | 0.266                                        |
| Official negotiated price | Δ ORR                  |                        | 29                                       | simple                    | 67072.16  | 92.845                                    | 0.696                                 | 0.076                      | 0.006                                        |
| Discounted price          | Δ ORR                  |                        | 28                                       | simple                    | 53147.09  | -14.550                                   | 0.953                                 | -0.010                     | 0.000                                        |
| Official negotiated price | Δ ORR                  | tumor type             | 29                                       | multiple                  | 62277.57  | 180.118                                   | 0.607                                 |                            | 0.448                                        |
| Discounted price          | Δ ORR                  | tumor type             | 28                                       | multiple                  | 42598.33  | 324.629                                   | 0.383                                 |                            | 0.450                                        |
| Official negotiated price | % Δ ORR                |                        | 27                                       | simple                    | 69838.7   | 0.563                                     | 0.918                                 | 0.020                      | 0.000                                        |
| Discounted price          | % Δ ORR                |                        | 26                                       | simple                    | 53627.54  | 0.965                                     | 0.864                                 | 0.036                      | 0.001                                        |
| Official negotiated price | % Δ ORR                | tumor type             | 27                                       | multiple                  | 67262.18  | 1.719                                     | 0.814                                 |                            | 0.436                                        |
| Discounted price          | % Δ ORR                | tumor type             | 26                                       | multiple                  | 51599.74  | 2.958                                     | 0.704                                 |                            | 0.405                                        |

Progression Free Survival (PFS); Overall Survival (OS); Objective Response Rate (ORR)



**1a. Official negotiated price (ex-factory) vs percentage improvement in median Overall Survival (OS)** (16 drugs are included in the analysis: 15 with a single indication and one with two indications)

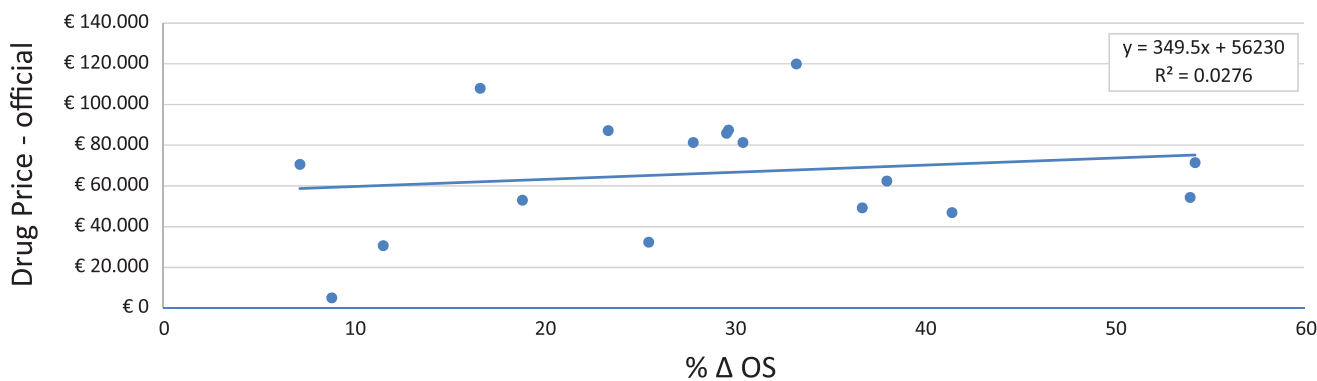

**1b. Official negotiated price (ex-factory) vs percentage improvement in median Progression Free Survival (PFS)** (25 drugs are included in the analysis: 22 with a single indication, two with two indications and one with three indication)

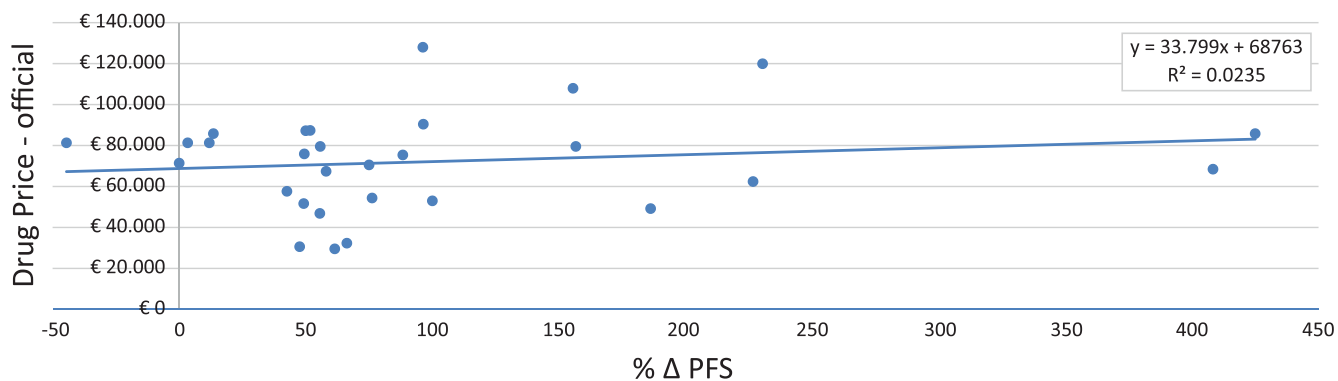

**1c. Official negotiated price (ex-factory) vs percentage improvement in proportion of Objective Response Rate (ORR)** (24 drugs are included in the analysis: 20 with a single indication, three with two indications and one with three indications)

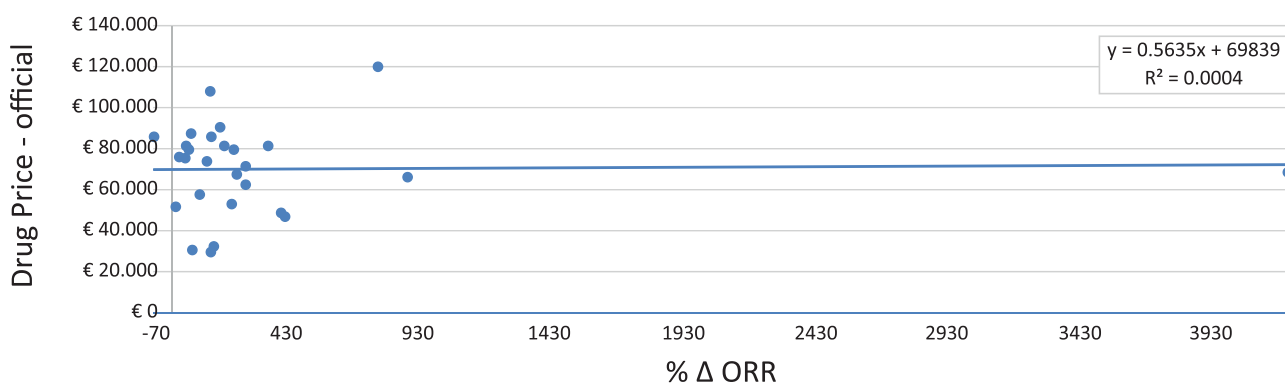

Progression Free Survival (PFS); Overall Survival (OS); Objective Response Rate (ORR)

**2. Official negotiated price (ex-factory) vs median Progression Free Survival (PFS), excluding negative outcome data (25 drugs are included in the analysis: 22 with a single indication and three with two indications)**



Progression Free Survival (PFS)

For peer review only

**3a. Official negotiated price (ex-factory) vs median Overall Survival (OS), considering only data from placebo-controlled trials. (7 drugs related to a single indication are included in the analysis)**



**3b. Official negotiated price (ex-factory) vs median Progression Free Survival (PFS), considering only data from placebo-controlled trials. (11 drugs are included in the analysis: 10 with a single indication and one with 2 indications)**



Progression Free Survival (PFS); Overall Survival (OS)

**4a.** Official negotiated price (ex-factory) vs median Progression Free Survival (PFS), stratified by type of cancer (at least 2 indications for each cancer type). (24 drugs are included in the analysis: 21 with a single indication, two with two indications and one with three indication)



**4b.** Discounted price with additional compulsory rebates vs median Progression Free Survival (PFS), stratified by type of cancer (at least 2 indications for each cancer type). (24 drugs are included in the analysis: 21 with a single indication and three with 2 indications)



Progression Free Survival (PFS)

## STROBE (Strengthening The Reporting of OBservational Studies in Epidemiology) Checklist

A checklist of items that should be included in reports of observational studies. You must report the page number in your manuscript where you consider each of the items listed in this checklist. If you have not included this information, either revise your manuscript accordingly before submitting or note N/A.

**Note:** An Explanation and Elaboration article discusses each checklist item and gives methodological background and published examples of transparent reporting. The STROBE checklist is best used in conjunction with this article (freely available on the Web sites of PLoS Medicine at <http://www.plosmedicine.org/>, Annals of Internal Medicine at <http://www.annals.org/>, and Epidemiology at <http://www.epidem.com/>). Information on the STROBE Initiative is available at [www.strobe-statement.org](http://www.strobe-statement.org).

| Section and Item     | Item No. | Recommendation                                                                                                                                                                                                                                                                                                                                                                                                                                                                 | Reported on Page No. |
|----------------------|----------|--------------------------------------------------------------------------------------------------------------------------------------------------------------------------------------------------------------------------------------------------------------------------------------------------------------------------------------------------------------------------------------------------------------------------------------------------------------------------------|----------------------|
| Title and Abstract   | 1        | (a) Indicate the study's design with a commonly used term in the title or the abstract                                                                                                                                                                                                                                                                                                                                                                                         |                      |
|                      |          | (b) Provide in the abstract an informative and balanced summary of what was done and what was found                                                                                                                                                                                                                                                                                                                                                                            |                      |
| <b>Introduction</b>  |          |                                                                                                                                                                                                                                                                                                                                                                                                                                                                                |                      |
| Background/Rationale | 2        | Explain the scientific background and rationale for the investigation being reported                                                                                                                                                                                                                                                                                                                                                                                           |                      |
| Objectives           | 3        | State specific objectives, including any prespecified hypotheses                                                                                                                                                                                                                                                                                                                                                                                                               |                      |
| <b>Methods</b>       |          |                                                                                                                                                                                                                                                                                                                                                                                                                                                                                |                      |
| Study Design         | 4        | Present key elements of study design early in the paper                                                                                                                                                                                                                                                                                                                                                                                                                        |                      |
| Setting              | 5        | Describe the setting, locations, and relevant dates, including periods of recruitment, exposure, follow-up, and data collection                                                                                                                                                                                                                                                                                                                                                |                      |
| Participants         | 6        | (a) <i>Cohort study</i> —Give the eligibility criteria, and the sources and methods of selection of participants. Describe methods of follow-up<br><br><i>Case-control study</i> —Give the eligibility criteria, and the sources and methods of case ascertainment and control selection. Give the rationale for the choice of cases and controls<br><br><i>Cross-sectional study</i> —Give the eligibility criteria, and the sources and methods of selection of participants |                      |
|                      |          | (b) <i>Cohort study</i> —For matched studies, give matching criteria and number of exposed and unexposed<br><br><i>Case-control study</i> —For matched studies, give matching criteria and the number of controls per case                                                                                                                                                                                                                                                     |                      |
| Variables            | 7        | Clearly define all outcomes, exposures, predictors, potential confounders, and effect modifiers. Give diagnostic criteria, if applicable                                                                                                                                                                                                                                                                                                                                       |                      |

| Section and Item             | Item No. | Recommendation                                                                                                                                                                                                                                                                                                    | Reported on Page No. |
|------------------------------|----------|-------------------------------------------------------------------------------------------------------------------------------------------------------------------------------------------------------------------------------------------------------------------------------------------------------------------|----------------------|
| Data Sources/<br>Measurement | 8*       | For each variable of interest, give sources of data and details of methods of assessment (measurement). Describe comparability of assessment methods if there is more than one group                                                                                                                              |                      |
| Bias                         | 9        | Describe any efforts to address potential sources of bias                                                                                                                                                                                                                                                         |                      |
| Study Size                   | 10       | Explain how the study size was arrived at                                                                                                                                                                                                                                                                         |                      |
| Quantitative Variables       | 11       | Explain how quantitative variables were handled in the analyses. If applicable, describe which groupings were chosen and why                                                                                                                                                                                      |                      |
| Statistical Methods          | 12       | (a) Describe all statistical methods, including those used to control for confounding                                                                                                                                                                                                                             |                      |
|                              |          | (b) Describe any methods used to examine subgroups and interactions                                                                                                                                                                                                                                               |                      |
|                              |          | (c) Explain how missing data were addressed                                                                                                                                                                                                                                                                       |                      |
|                              |          | (d) <i>Cohort study</i> —If applicable, explain how loss to follow-up was addressed<br><br><i>Case-control study</i> —If applicable, explain how matching of cases and controls was addressed<br><br><i>Cross-sectional study</i> —If applicable, describe analytical methods taking account of sampling strategy |                      |
|                              |          | (e) Describe any sensitivity analyses                                                                                                                                                                                                                                                                             |                      |
| <b>Results</b>               |          |                                                                                                                                                                                                                                                                                                                   |                      |
| Participants                 | 13*      | (a) Report numbers of individuals at each stage of study—eg numbers potentially eligible, examined for eligibility, confirmed eligible, included in the study, completing follow-up, and analysed                                                                                                                 |                      |
|                              |          | (b) Give reasons for non-participation at each stage                                                                                                                                                                                                                                                              |                      |
|                              |          | (c) Consider use of a flow diagram                                                                                                                                                                                                                                                                                |                      |
| Descriptive Data             | 14*      | (a) Give characteristics of study participants (eg demographic, clinical, social) and information on exposures and potential confounders                                                                                                                                                                          |                      |
|                              |          | (b) Indicate number of participants with missing data for each variable of interest                                                                                                                                                                                                                               |                      |
|                              |          | (c) <i>Cohort study</i> —Summarise follow-up time (eg, average and total amount)                                                                                                                                                                                                                                  |                      |
| Outcome Data                 | 15*      | <i>Cohort study</i> —Report numbers of outcome events or summary measures over time                                                                                                                                                                                                                               |                      |
|                              |          | <i>Case-control study</i> —Report numbers in each exposure category, or summary measures of exposure                                                                                                                                                                                                              |                      |
|                              |          | <i>Cross-sectional study</i> —Report numbers of outcome events or summary measures                                                                                                                                                                                                                                |                      |

| Section and Item         | Item No. | Recommendation                                                                                                                                                                                               | Reported on Page No. |
|--------------------------|----------|--------------------------------------------------------------------------------------------------------------------------------------------------------------------------------------------------------------|----------------------|
| Main Results             | 16       | (a) Give unadjusted estimates and, if applicable, confounder-adjusted estimates and their precision (eg, 95% confidence interval). Make clear which confounders were adjusted for and why they were included |                      |
|                          |          | (b) Report category boundaries when continuous variables were categorized                                                                                                                                    |                      |
|                          |          | (c) If relevant, consider translating estimates of relative risk into absolute risk for a meaningful time period                                                                                             |                      |
| Other Analyses           | 17       | Report other analyses done—eg analyses of subgroups and interactions, and sensitivity analyses                                                                                                               |                      |
| <b>Discussion</b>        |          |                                                                                                                                                                                                              |                      |
| Key Results              | 18       | Summarise key results with reference to study objectives                                                                                                                                                     |                      |
| Limitations              | 19       | Discuss limitations of the study, taking into account sources of potential bias or imprecision. Discuss both direction and magnitude of any potential bias                                                   |                      |
| Interpretation           | 20       | Give a cautious overall interpretation of results considering objectives, limitations, multiplicity of analyses, results from similar studies, and other relevant evidence                                   |                      |
| Generalisability         | 21       | Discuss the generalisability (external validity) of the study results                                                                                                                                        |                      |
| <b>Other Information</b> |          |                                                                                                                                                                                                              |                      |
| Funding                  | 22       | Give the source of funding and the role of the funders for the present study and, if applicable, for the original study on which the present article is based                                                |                      |

\*Give information separately for cases and controls in case-control studies and, if applicable, for exposed and unexposed groups in cohort and cross-sectional studies.

**Once you have completed this checklist, please save a copy and upload it as part of your submission. DO NOT include this checklist as part of the main manuscript document. It must be uploaded as a separate file.**
