# Supplementary material for: Anticancer drug prices and clinical outcomes: a cross-sectional study in Italy
Source: PubMed Central journal article supplement — BMJ Open. 2019 Dec 10;9(12):e033728. doi: 10.1136/bmjopen-2019-033728 (PMC6924817; doi:10.1136/bmjopen-2019-033728), 2019-12-10
Supplement: bmjopen-2019-033728supp001.pdf [file bmjopen-2019-033728supp001.pdf]

**1a. Official negotiated price (ex-factory) vs percentage improvement in median Overall Survival (OS)**  
(16 drugs are included in the analysis: 15 with a single indication and one with two indications)

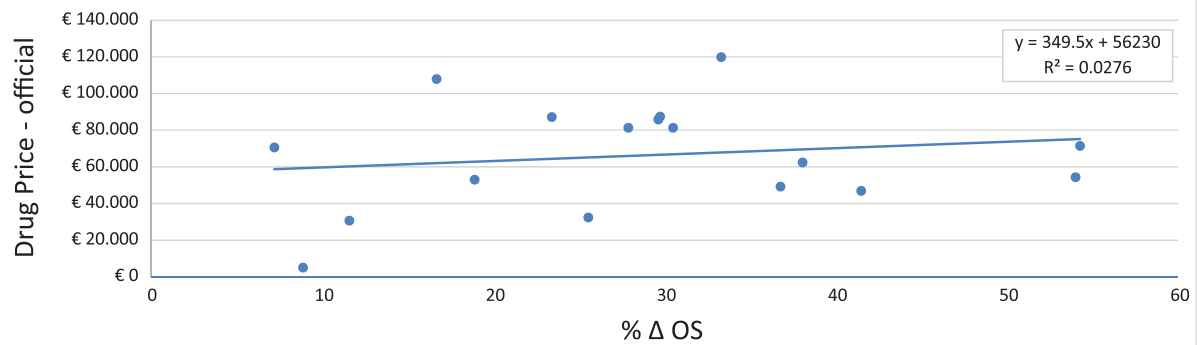

**1b. Official negotiated price (ex-factory) vs percentage improvement in median Progression Free Survival (PFS)**  
(25 drugs are included in the analysis: 22 with a single indication, two with two indications and one with three indication)

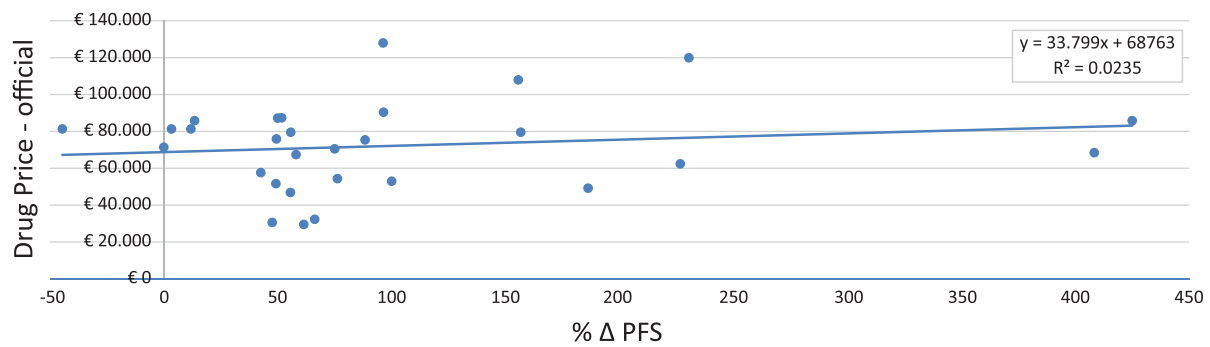

**1c. Official negotiated price (ex-factory) vs percentage improvement in proportion of Objective Response Rate (ORR)**  
(24 drugs are included in the analysis: 20 with a single indication, three with two indications and one with three indications)

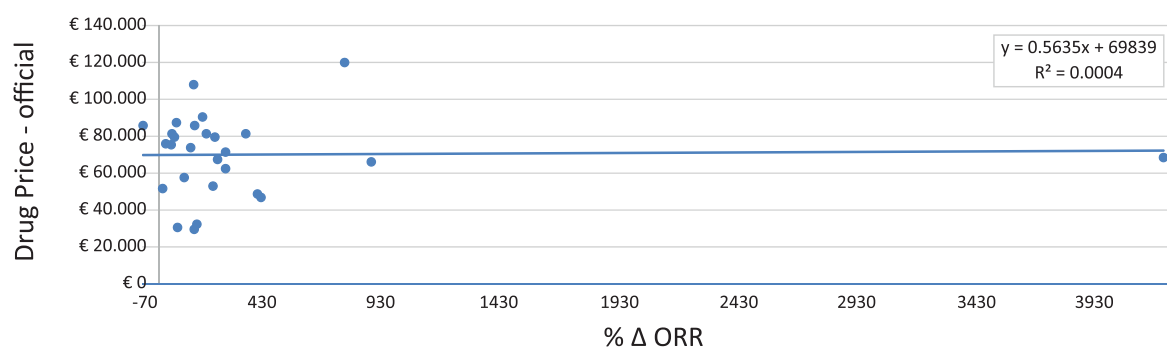

Progression Free Survival (PFS); Overall Survival (OS); Objective Response Rate (ORR)
