# Supplementary material for: Anticancer drug prices and clinical outcomes: a cross-sectional study in Italy
Source: PubMed Central journal article supplement — BMJ Open. 2019 Dec 10;9(12):e033728. doi: 10.1136/bmjopen-2019-033728 (PMC6924817; doi:10.1136/bmjopen-2019-033728), 2019-12-10
Supplement: bmjopen-2019-033728supp002.pdf [file bmjopen-2019-033728supp002.pdf]

**2. Official negotiated price (ex-factory) vs median Progression Free Survival (PFS), excluding negative outcome data (25 drugs are included in the analysis: 22 with a single indication and three with two indications)**

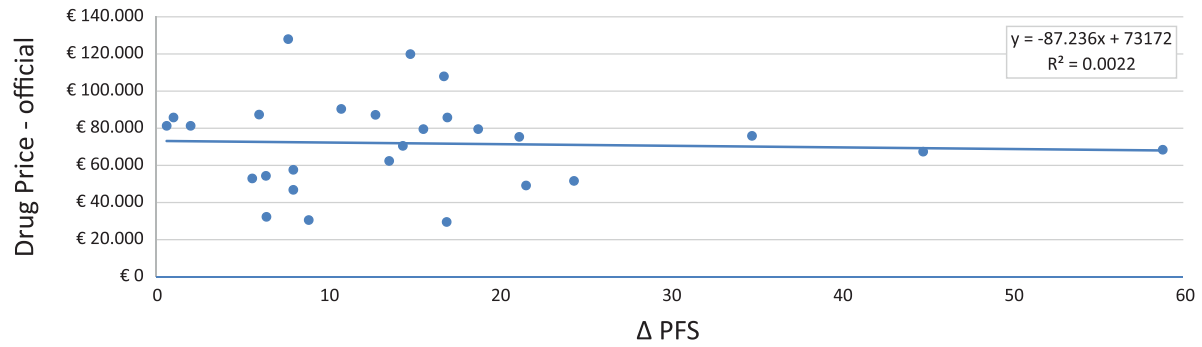

*Progression Free Survival (PFS)*
