# Supplementary material for: Anticancer drug prices and clinical outcomes: a cross-sectional study in Italy
Source: PubMed Central journal article supplement — BMJ Open. 2019 Dec 10;9(12):e033728. doi: 10.1136/bmjopen-2019-033728 (PMC6924817; doi:10.1136/bmjopen-2019-033728), 2019-12-10
Supplement: bmjopen-2019-033728supp003.pdf [file bmjopen-2019-033728supp003.pdf]

**3a.** Official negotiated price (ex-factory) vs median Overall Survival (OS), considering only data from placebo-controlled trials. (7 drugs related to a single indication are included in the analysis)

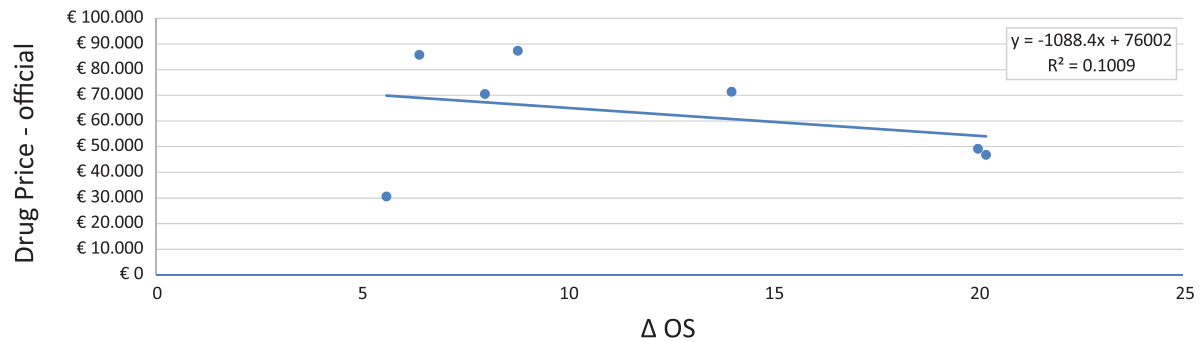

**3b.** Official negotiated price (ex-factory) vs median Progression Free Survival (PFS), considering only data from placebo-controlled trials. (11 drugs are included in the analysis: 10 with a single indication and one with 2 indications)

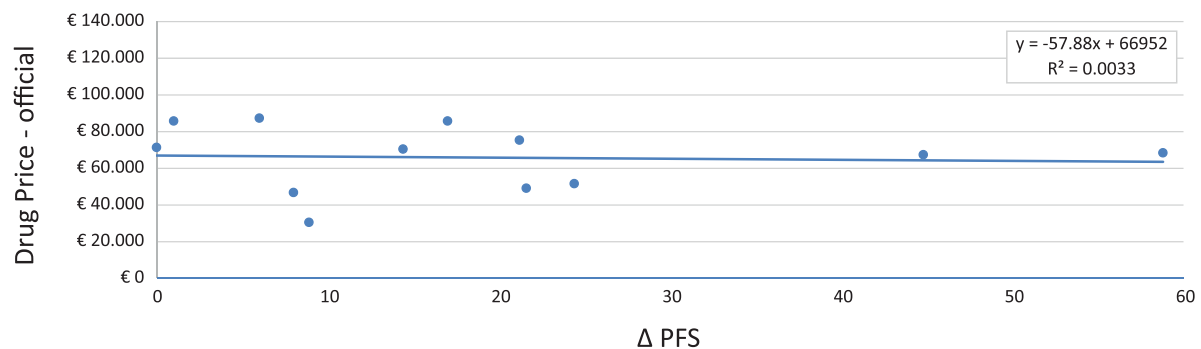

Progression Free Survival (PFS); Overall Survival (OS)
