# Supplementary material for: Anticancer drug prices and clinical outcomes: a cross-sectional study in Italy
Source: PubMed Central journal article supplement — BMJ Open. 2019 Dec 10;9(12):e033728. doi: 10.1136/bmjopen-2019-033728 (PMC6924817; doi:10.1136/bmjopen-2019-033728), 2019-12-10
Supplement: bmjopen-2019-033728supp004.pdf [file bmjopen-2019-033728supp004.pdf]

**4a.** Official negotiated price (ex-factory) vs median Progression Free Survival (PFS), stratified by type of cancer (at least 2 indications for each cancer type). (24 drugs are included in the analysis: 21 with a single indication, two with two indications and one with three indication)

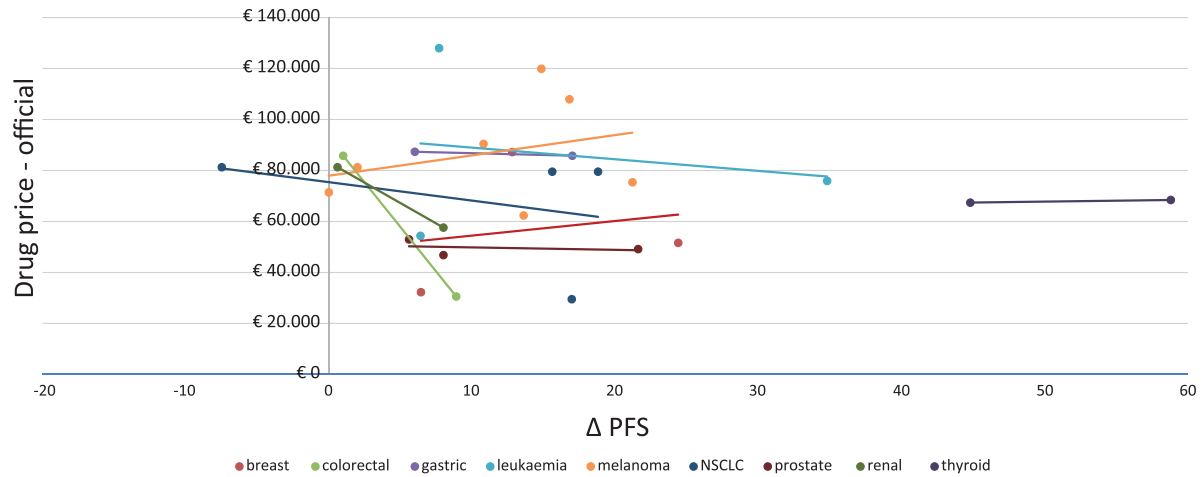

**4b.** Discounted price with additional compulsory rebates vs median Progression Free Survival (PFS), stratified by type of cancer (at least 2 indications for each cancer type). (24 drugs are included in the analysis: 21 with a single indication and three with 2 indications)

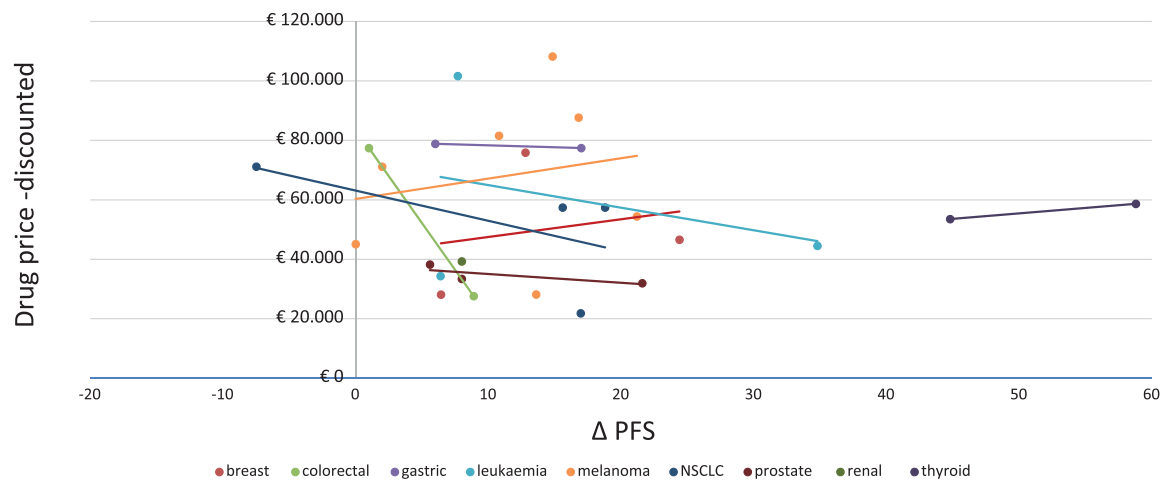

Progression Free Survival (PFS)
