# Supplementary material for: Anticancer drug prices and clinical outcomes: a cross-sectional study in Italy
Source: PubMed Central journal article supplement — BMJ Open. 2019 Dec 10;9(12):e033728. doi: 10.1136/bmjopen-2019-033728 (PMC6924817; doi:10.1136/bmjopen-2019-033728), 2019-12-10
Supplement: bmjopen-2019-033728supp005.pdf [file bmjopen-2019-033728supp005.pdf]

**Supplementary Table 1.** Details of the statistical analysis conducted

| Dependent variable        | Independent variable 1 | Independent variable 2 | Number of drugs involved in the analysis | Type of linear regression | Intercept | Coefficient of the Independent variable 1 | p value of the Independent variable 1 | Correlation coefficient: r | Coefficient of Determination: R <sup>2</sup> |
|---------------------------|------------------------|------------------------|------------------------------------------|---------------------------|-----------|-------------------------------------------|---------------------------------------|----------------------------|----------------------------------------------|
| Official negotiated price | Δ OS                   |                        | 17                                       | simple                    | 50332.71  | 1256.724                                  | 0.315                                 | 0.259                      | 0.067                                        |
| Discounted price          | Δ OS                   |                        | 16                                       | simple                    | 44963.88  | 528.800                                   | 0.695                                 | 0.11                       | 0.0113                                       |
| Official negotiated price | Δ OS                   | tumor type             | 17                                       | multiple                  | 57765.99  | 2065.264                                  | 0.433                                 |                            | 0.412                                        |
| Discounted price          | Δ OS                   | tumor type             | 16                                       | multiple                  | 55312.8   | 1391.947                                  | 0.614                                 |                            | 0.257                                        |
| Official negotiated price | % Δ OS                 |                        | 17                                       | simple                    | 56230.04  | 349.505                                   | 0.524                                 | 0.166                      | 0.027                                        |
| Discounted price          | % Δ OS                 |                        | 16                                       | simple                    | 50127.28  | 42.986                                    | 0.937                                 | 0.022                      | 0.0005                                       |
| Official negotiated price | % Δ OS                 | tumor type             | 17                                       | multiple                  | 72407.98  | 292.048                                   | 0.766                                 |                            | 0.362                                        |
| Discounted price          | % Δ OS                 | tumor type             | 16                                       | multiple                  | 68456.17  | 89.3936                                   | 0.930                                 |                            | 0.2286                                       |
| Official negotiated price | Δ PFS                  |                        | 29                                       | simple                    | 73741.11  | -113.515                                  | 0.738                                 | -0.065                     | 0.004                                        |
| Discounted price          | Δ PFS                  |                        | 28                                       | simple                    | 58574.12  | -137.018                                  | 0.687                                 | -0.080                     | 0.006                                        |
| Official negotiated price | Δ PFS                  | tumor type             | 29                                       | multiple                  | 70454.93  | -271.324                                  | 0.635                                 |                            | 0.338                                        |
| Discounted price          | Δ PFS                  | tumor type             | 28                                       | multiple                  | 56293.38  | -393.926                                  | 0.508                                 |                            | 0.283                                        |
| Official negotiated price | % Δ PFS                |                        | 29                                       | simple                    | 68763.32  | 33.7994                                   | 0.427                                 | 0.153                      | 0.024                                        |
| Discounted price          | % Δ PFS                |                        | 28                                       | simple                    | 52823.84  | 36.2925                                   | 0.392                                 | 0.169                      | 0.028                                        |
| Official negotiated price | % Δ PFS                | tumor type             | 29                                       | multiple                  | 66564.96  | 15.935                                    | 0.765                                 |                            | 0.333                                        |
| Discounted price          | % Δ PFS                | tumor type             | 28                                       | multiple                  | 51337.49  | 11.068                                    | 0.842                                 |                            | 0.266                                        |
| Official negotiated price | Δ ORR                  |                        | 29                                       | simple                    | 67072.16  | 92.845                                    | 0.696                                 | 0.076                      | 0.006                                        |
| Discounted price          | Δ ORR                  |                        | 28                                       | simple                    | 53147.09  | -14.550                                   | 0.953                                 | -0.010                     | 0.000                                        |
| Official negotiated price | Δ ORR                  | tumor type             | 29                                       | multiple                  | 62277.57  | 180.118                                   | 0.607                                 |                            | 0.448                                        |
| Discounted price          | Δ ORR                  | tumor type             | 28                                       | multiple                  | 42598.33  | 324.629                                   | 0.383                                 |                            | 0.450                                        |
| Official negotiated price | % Δ ORR                |                        | 27                                       | simple                    | 69838.7   | 0.563                                     | 0.918                                 | 0.020                      | 0.000                                        |
| Discounted price          | % Δ ORR                |                        | 26                                       | simple                    | 53627.54  | 0.965                                     | 0.864                                 | 0.036                      | 0.001                                        |
| Official negotiated price | % Δ ORR                | tumor type             | 27                                       | multiple                  | 67262.18  | 1.719                                     | 0.814                                 |                            | 0.436                                        |
| Discounted price          | % Δ ORR                | tumor type             | 26                                       | multiple                  | 51599.74  | 2.958                                     | 0.704                                 |                            | 0.405                                        |

Progression Free Survival (PFS); Overall Survival (OS); Objective Response Rate (ORR)
